# Supplementary material for: Genome-Wide Association Study and Identification of Candidate Genes for Intramuscular Fat Fatty Acid Composition in Ningxiang Pigs
Source: MDPI journal article supplement (doi:10.3390/ani13203192), 2023-10-13
Supplement: s1 [file s1]

**Table S1.** Detailed information on 25 fatty acids present in IMF of the *longissimus dorsi* of Ningxiang pigs.

| Substance Name                    | N   | Relative Content ( $\pm$ SE) (%) |
|-----------------------------------|-----|----------------------------------|
| IMF                               | 691 | 3.65 ( $\pm$ 0.04)               |
| (Intramuscular fat)               |     |                                  |
| SFA                               | 691 | 39.35 ( $\pm$ 0.38)              |
| (Saturated fat acid)              |     |                                  |
| C10:0 <sup>#</sup>                | 279 | 0.24 ( $\pm$ 0.005)              |
| (Capric)                          |     |                                  |
| C12:0 <sup>#</sup>                | 428 | 0.12 ( $\pm$ 0.002)              |
| (Lauric acid)                     |     |                                  |
| C14:0                             | 649 | 1.42 ( $\pm$ 0.01)               |
| (Myristic acid)                   |     |                                  |
| C15:0 <sup>#</sup>                | 132 | 0.04 ( $\pm$ 0.002)              |
| (Myristic oleic acid)             |     |                                  |
| C16:0                             | 651 | 26.38 ( $\pm$ 0.06)              |
| (Palmitic acid)                   |     |                                  |
| C17:0                             | 645 | 0.15 ( $\pm$ 0.001)              |
| (Margaric acid)                   |     |                                  |
| C18:0                             | 651 | 13.42 ( $\pm$ 0.06)              |
| (Stearic acid)                    |     |                                  |
| C20:0                             | 649 | 0.21 ( $\pm$ 0.002)              |
| (Arachidic acid)                  |     |                                  |
| C22:0 <sup>#</sup>                | 161 | 0.10 ( $\pm$ 0.004)              |
| (Behenic acid)                    |     |                                  |
| C23:0 <sup>#</sup>                | 201 | 0.17 ( $\pm$ 0.01)               |
| (Tricosanoic acid)                |     |                                  |
| C24:0 <sup>#</sup>                | 191 | 0.20 ( $\pm$ 0.01)               |
| (Lignoceric acid)                 |     |                                  |
| MUFA                              | 691 | 41.88 ( $\pm$ 0.42)              |
| (Monounsaturated fat acid)        |     |                                  |
| C14:1 <sup>#</sup>                | 80  | 0.04 ( $\pm$ 0.12)               |
| (Myristoleic acid)                |     |                                  |
| C16:1                             | 650 | 3.28 ( $\pm$ 1.03)               |
| (Palmitoleic acid)                |     |                                  |
| C17:1 <sup>#</sup>                | 66  | 0.10 ( $\pm$ 0.004)              |
| (Margaroleic acid)                |     |                                  |
| C18:1n-9(t)                       | 627 | 0.11 ( $\pm$ 0.001)              |
| (Elaidic acid)                    |     |                                  |
| C18:1n-9(c)                       | 651 | 40.28 ( $\pm$ 0.12)              |
| (Oleic acid)                      |     |                                  |
| C20:1                             | 650 | 0.80 ( $\pm$ 0.01)               |
| (Eicosenoic acid)                 |     |                                  |
| PUFA                              | 691 | 12.78 ( $\pm$ 0.18)              |
| (Polyunsaturated fatty acid)      |     |                                  |
| C18:2n-6(c)                       | 651 | 10.12 ( $\pm$ 0.10)              |
| (Linoleic acid)                   |     |                                  |
| C18:3n-3                          | 572 | 0.36 ( $\pm$ 0.01)               |
| ( $\alpha$ -Linolenic acid---ALA) |     |                                  |
| C18:3n-6 <sup>#</sup>             | 220 | 0.07 ( $\pm$ 0.02)               |

|                                    |     |                    |
|------------------------------------|-----|--------------------|
| ( $\gamma$ -Linolenic acid---GLA)  |     |                    |
| C20:2                              | 649 | 0.33 ( $\pm$ 0.03) |
| (Eicosa-11,14-dienoic acid)        |     |                    |
| C20:3n-3 <sup>#</sup>              | 151 | 0.09 ( $\pm$ 0.02) |
| (Dihomo- $\alpha$ -linolenic acid) |     |                    |
| C20:3n-6                           | 647 | 0.38 ( $\pm$ 0.01) |
| (Dihomo- $\gamma$ -linolenic acid) |     |                    |
| C20:4n-6                           | 649 | 2.42 ( $\pm$ 0.04) |
| (Arachidonic acid)                 |     |                    |
| C22:6n-3 <sup>#</sup>              | 64  | 0.09 ( $\pm$ 0.01) |
| (Docosaheptaenoic acid---DHA)      |     |                    |

N represents the number of individuals with this fatty acid detected in the population; relative content represents the mean value of the content, and SE represents the standard error; the “#” indicates the FA was removed due to a lower individual (N < 533).

**Table S2.** Genome-wide significant SNPs loci for SFAs, MUFAs and PUFAs in Ningxiang pigs.

| Fatty acid  | SNP                  | CHR | POS (bp)    | MAF <sup>1</sup> | <i>p</i> -value        | PVE (%)<br><sub>2</sub> | Nearest gene <sup>3</sup> | Location        |
|-------------|----------------------|-----|-------------|------------------|------------------------|-------------------------|---------------------------|-----------------|
| C14:0       | WU_10.2_3_116903421  | 3   | 116,903,421 | 0.10             | $2.15 \times 10^{-7}$  | 2.98                    | <i>ALK</i>                | Intronic        |
|             | H3GA0053711          | 10  | 19,975,279  | 0.39             | $1.10 \times 10^{-7}$  | 4.21                    | <i>HNRNPU</i>             | Intergenic      |
|             | ASGA0074106          | 16  | 75,024,639  | 0.20             | $1.43 \times 10^{-6}$  | 6.30                    | <i>MFAP3</i>              | Intronic        |
| C16:0       | ALGA0020228          | 3   | 102,155,060 | 0.27             | $3.04 \times 10^{-8}$  | 0.96                    | <i>CAMKMT</i>             | Intergenic      |
|             | WU_10.2_4_119395133  | 4   | 119,395,133 | 0.20             | $7.24 \times 10^{-7}$  | 0.71                    | <i>CEPT1</i>              | Intronic        |
|             | ASGA0027821          | 6   | 20,665,813  | 0.08             | $1.66 \times 10^{-6}$  | 1.87                    | ---                       | Intergenic      |
|             | MARC0001638          | 9   | 20,050,249  | 0.38             | $3.49 \times 10^{-9}$  | 1.54                    | ---                       | Intergenic      |
|             | M1GA0024654          | 12  | 23,711,351  | 0.25             | $2.83 \times 10^{-8}$  | 1.49                    | <i>NPEPPS</i>             | Intronic        |
|             | ASGA0053936          | 12  | 28,196,313  | 0.10             | $9.35 \times 10^{-7}$  | 2.46                    | <i>CA10</i>               | Intergenic      |
|             | ALGA0071522          | 13  | 101,058,816 | 0.48             | $1.60 \times 10^{-7}$  | 0.92                    | <i>P2RY1 / RAP2B</i>      | Intergenic      |
|             | WU_10.2_3_142168876  | 3   | 142,168,876 | 0.22             | $3.47 \times 10^{-7}$  | 1.63                    | <i>ENSSSCG00000008655</i> | Intronic        |
| C17:0       | WU_10.2_4_89693248   | 4   | 89,693,248  | 0.13             | $1.09 \times 10^{-6}$  | 0.98                    | <i>ATP1B1 / DPT</i>       | Intergenic      |
|             | ALGA0040777          | 7   | 41,624,144  | 0.44             | $2.75 \times 10^{-8}$  | 1.06                    | <i>ENSSSCG00000027922</i> | Intergenic      |
|             | WU_10.2_12_7644839   | 12  | 7,644,839   | 0.02             | $1.40 \times 10^{-7}$  | 5.94                    | <i>SDK2</i>               | Intergenic      |
|             | ASGA0059505          | 13  | 191,280,771 | 0.01             | $4.53 \times 10^{-8}$  | 11.39                   | <i>ENSSSCG00000012009</i> | Intergenic      |
|             | ASGA0097154          | 16  | 38,383,883  | 0.35             | $1.23 \times 10^{-6}$  | 0.74                    | <i>MIER3 / GPBP1</i>      | Intergenic      |
|             | ALGA0010606          | 1   | 302,716,687 | 0.02             | $1.05 \times 10^{-8}$  | 5.30                    | <i>SWI5</i>               | 3 prime UTR     |
|             | WU_10.2_11_3591593   | 11  | 3,591,593   | 0.45             | $1.78 \times 10^{-7}$  | 0.96                    | <i>CDK8</i>               | Intronic        |
|             | DRGA0011206          | 11  | 45,910,375  | 0.02             | $5.51 \times 10^{-8}$  | 6.85                    | <i>KLHL1</i>              | Intergenic      |
| C18:0       | WU_10.2_14_106229446 | 14  | 106,229,446 | 0.09             | $5.06 \times 10^{-12}$ | 6.06                    | <i>DKK1 / PRKG1</i>       | Intergenic      |
|             | ALGA0080940          | 14  | 118,552,421 | 0.30             | $3.94 \times 10^{-9}$  | 1.79                    | <i>AVPI1</i>              | Intronic        |
|             | WU_10.2_2_19459316   | 2   | 19,459,316  | 0.01             | $3.53 \times 10^{-10}$ | 0.50                    | <i>U5 / EXT2</i>          | Intergenic      |
|             | MARC0046666          | 2   | 99,366,616  | 0.10             | $1.11 \times 10^{-6}$  | 0.04                    | <i>MEF2C</i>              | Intergenic      |
|             | WU_10.2_3_13474115   | 3   | 13,474,115  | 0.17             | $9.65 \times 10^{-7}$  | 0.03                    | <i>SNORA79</i>            | Intergenic      |
|             | ALGA0025658          | 4   | 75,387,791  | 0.03             | $1.21 \times 10^{-8}$  | 2.18                    | <i>ARMC1</i>              | Intergenic      |
|             | DRGA0005776          | 5   | 46,748,561  | 0.01             | $9.76 \times 10^{-18}$ | 0                       | <i>IPO8</i>               | Intergenic      |
|             | H3GA0016783          | 5   | 71,996,403  | 0.36             | $9.65 \times 10^{-16}$ | 0.12                    | <i>IL17RA / CECR2</i>     | Upstream gene   |
| C20:0       | WU_10.2_5_102656712  | 5   | 102,656,712 | 0.01             | $1.17 \times 10^{-6}$  | 0.19                    | ---                       | ---             |
|             | WU_10.2_7_6641603    | 7   | 6,641,603   | 0.06             | $1.79 \times 10^{-6}$  | 0.04                    | <i>OFCC1</i>              | Intergenic      |
|             | MARC0077077          | 7   | 90,165,851  | 0.03             | $1.22 \times 10^{-8}$  | 0.02                    | <i>U4</i>                 | ---             |
|             | ALGA0047587          | 8   | 36,220,598  | 0.01             | $1.33 \times 10^{-17}$ | 89.85                   | ---                       | ---             |
|             | ALGA0049475          | 8   | 58,905,523  | 0.02             | $1.57 \times 10^{-9}$  | 0.38                    | <i>TMEM165 / REST</i>     | ---             |
|             | WU_10.2_13_7954310   | 13  | 7,954,310   | 0.02             | $1.07 \times 10^{-6}$  | 0.13                    | <i>EFHB / PP2D1</i>       | Intergenic      |
|             | H3GA0041501          | 14  | 98,921,568  | 0.37             | $4.07 \times 10^{-7}$  | 0.02                    | <i>ALOX5</i>              | Intronic        |
|             | MARC0054269          | 16  | 33,826,642  | 0.45             | $5.43 \times 10^{-9}$  | 0.04                    | <i>ITGA1</i>              | Intronic        |
|             | WU_10.2_16_59778879  | 16  | 59,778,879  | 0.12             | $3.17 \times 10^{-14}$ | 0.48                    | <i>SLIT3</i>              | Intronic        |
|             | ASGA0073724          | 16  | 65,860,356  | 0.38             | $1.45 \times 10^{-10}$ | 0.06                    | ---                       | ---             |
|             | ALGA0004246          | 1   | 80,989,471  | 0.19             | $1.47 \times 10^{-6}$  | 8.55                    | <i>PREP</i>               | Intergenic      |
|             | MARC0099145          | 11  | 7,302,533   | 0.26             | $3.19 \times 10^{-7}$  | 2.20                    | <i>ALOX5AP / MEDAG</i>    | Intergenic      |
|             | ALGA0081341          | 14  | 127,218,925 | 0.42             | $5.58 \times 10^{-7}$  | 2.81                    | <i>U6</i>                 | Intergenic      |
|             | ALGA0015731          | 2   | 132,199,278 | 0.37             | $6.33 \times 10^{-7}$  | 0.67                    | <i>PRDM6</i>              | Intronic        |
| C18:1n-9(c) | WU_10.2_7_113985448  | 7   | 113,985,448 | 0.337            | $1.41 \times 10^{-6}$  | 1.67                    | <i>FLRT2</i>              | Intergenic      |
|             | ASGA0064960          | 14  | 77,566,009  | 0.34             | $9.97 \times 10^{-7}$  | 0.41                    | <i>RUFY2</i>              | Intronic        |
|             | H3GA0012422          | 4   | 31,763,547  | 0.02             | $4.00 \times 10^{-8}$  | 0.73                    | <i>RSPO2</i>              | Intergenic      |
| C18:1n-9(t) | DIAS0004691          | 7   | 29,798,220  | 0.02             | $5.20 \times 10^{-8}$  | 1.37                    | <i>RXR8 / COL11A2</i>     | Downstream gene |
|             | ASGA0033619          | 7   | 52,577,418  | 0.02             | $9.68 \times 10^{-7}$  | 0.52                    | <i>MCM3 / PAQR8</i>       | ---             |

|             |                      |    |             |      |                        |       |                        |               |
|-------------|----------------------|----|-------------|------|------------------------|-------|------------------------|---------------|
|             | H3GA0025990          | 9  | 2,779,787   | 0.01 | $4.13 \times 10^{-10}$ | 2.69  | SYT9                   | Intronic      |
|             | ALGA0079386          | 14 | 91,261,955  | 0.29 | $6.50 \times 10^{-7}$  | 0.26  | NRG3 / SNORA31         | Intergenic    |
|             | H3GA0046208          | 16 | 22,351,887  | 0.01 | $1.46 \times 10^{-11}$ | 45.24 | CAPSL                  | Intronic      |
|             | DRGA0016063          | 16 | 32,872,449  | 0.04 | $1.06 \times 10^{-13}$ | 31.52 | ISL1                   | Intergenic    |
|             | ASGA0004095          | 1  | 113,473,890 | 0.24 | $4.76 \times 10^{-7}$  | 0.79  | ENSSSCG0000000452<br>7 | Intergenic    |
|             | ASGA0085560          | 3  | 26,316,304  | 0.36 | $2.27 \times 10^{-8}$  | 1.43  | GP2 / GPR139           | Intergenic    |
| C20:1       | WU_10.2_5_13180559   | 5  | 13,180,559  | 0.38 | $2.03 \times 10^{-9}$  | 0.85  | CRY1                   | Intronic      |
|             | ASGA0031521          | 7  | 17,152,543  | 0.02 | $7.91 \times 10^{-9}$  | 6.73  | CDKAL1                 | ---           |
|             | 7_134762912          | 7  | 134,762,912 | 0.26 | $6.37 \times 10^{-11}$ | 1.67  | SCARNA6                | Intergenic    |
|             | ALGA0111031          | 8  | 41,395,488  | 0.25 | $1.91 \times 10^{-6}$  | 2.27  | USP46                  | Intergenic    |
|             | ASGA0059943          | 13 | 210,282,758 | 0.10 | $4.97 \times 10^{-7}$  | 0.82  | CLDN14 / SIM2          | Intergenic    |
|             | H3GA0047778          | 17 | 7,610,059   | 0.03 | $1.62 \times 10^{-7}$  | 3.49  | ---                    | ---           |
| C18:2n-6(c) | ALGA0015731          | 2  | 132,199,278 | 0.37 | $1.99 \times 10^{-7}$  | 2.10  | CEP120                 | Intronic      |
|             | WU_10.2_5_24153921   | 5  | 24,153,921  | 0.02 | $1.45 \times 10^{-11}$ | 18.22 | RDH16 / NDUFA4L2       | Intergenic    |
|             | ASGA0085192          | 16 | 76,899,854  | 0.05 | $5.47 \times 10^{-7}$  | 6.33  | ENSSSCG0000001707<br>7 | Intergenic    |
|             | MARC0014875          | 5  | 26,784,432  | 0.01 | $1.52 \times 10^{-9}$  | 21.92 | SLC16A7                | Intergenic    |
| C18:3n-3    | ALGA0111381          | 9  | 14,991,770  | 0.02 | $6.15 \times 10^{-8}$  | 5.51  | ssc-mir-708            | Intergenic    |
|             | DRGA0009320          | 9  | 37,972,729  | 0.08 | $3.28 \times 10^{-9}$  | 16.44 | ENSSSCG0000001499<br>3 | Intronic      |
|             | ASGA0060681          | 14 | 5,504,363   | 0.42 | $8.41 \times 10^{-7}$  | 1.53  | SNORA25                | Intergenic    |
| C20:2       | ALGA0004743          | 1  | 96,303,394  | 0.08 | $4.70 \times 10^{-7}$  | 10.78 | ENSSSCG0000002237<br>9 | Intergenic    |
|             | WU_10.2_2_7173969    | 2  | 7,173,969   | 0.23 | $6.35 \times 10^{-10}$ | 2.14  | FLRT1                  | Intronic      |
|             | WU_10.2_2_9630034    | 2  | 9,630,034   | 0.19 | $6.76 \times 10^{-7}$  | 2.15  | SDHAF2                 | Missense      |
| C20:3n-6    | ALGA0106081          | 2  | 12,459,648  | 0.18 | $7.40 \times 10^{-8}$  | 1.62  | ENSSSCG0000002294<br>3 | Upstream gene |
|             | ASGA0039809          | 8  | 130,628,617 | 0.18 | $1.18 \times 10^{-9}$  | 1.84  | EIF4E                  | Intronic      |
|             | ALGA0115480          | 13 | 187,857,350 | 0.11 | $1.14 \times 10^{-7}$  | 1.57  | ROBO2                  | Intergenic    |
|             | ALGA0031262          | 5  | 23,686,043  | 0.01 | $2.71 \times 10^{-16}$ | 31.76 | PTGES3                 | Intronic      |
| C20:4n-6    | WU_10.2_9_42529952   | 9  | 42,529,952  | 0.02 | $2.28 \times 10^{-10}$ | 7.56  | C11orf87 / U1          | Intergenic    |
|             | WU_10.2_13_194176619 | 13 | 194,176,619 | 0.22 | $1.73 \times 10^{-6}$  | 1.20  | U6                     | Intergenic    |

<sup>1</sup>MAF: minor allelic frequency;

<sup>2</sup>PVE: explained phenotype variance;

<sup>3</sup> The nearest genes are the closest genes within 500kb upstream and downstream of the significant SNP.
