# Supplementary material for: Genome-Wide Association Study and Identification of Candidate Genes for Intramuscular Fat Fatty Acid Composition in Ningxiang Pigs
Source: MDPI journal article supplement (doi:10.3390/ani13203192), 2023-10-13
Supplement: s1 [file s1]

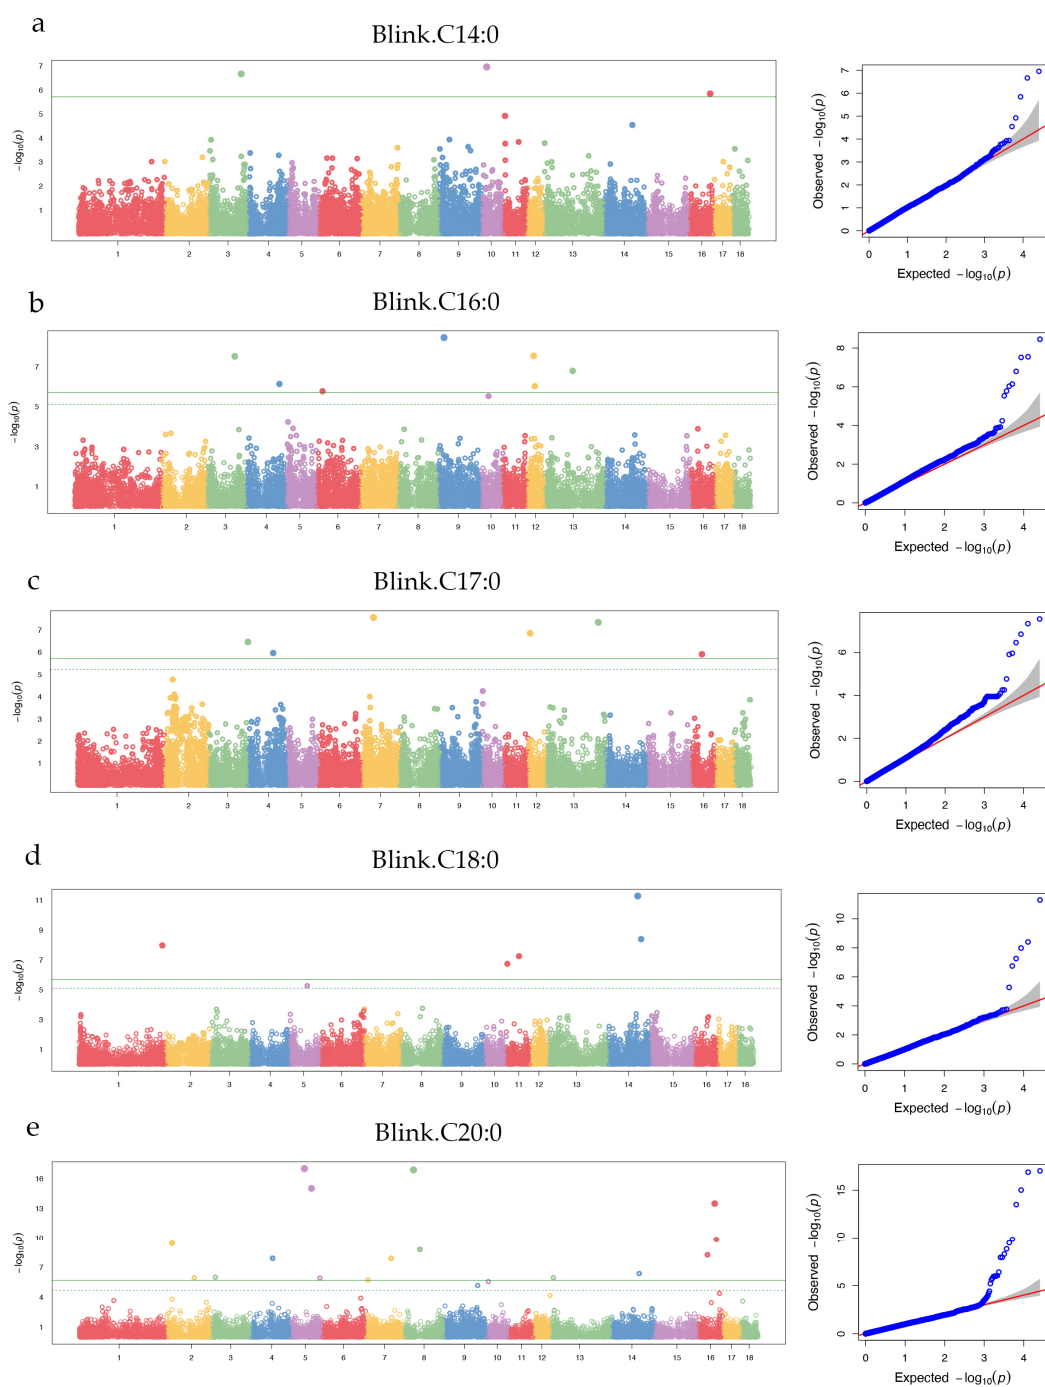

**Figure S1.** Manhattan plot for five SFAs (C14:0, C16:0, C17:0, C18:0, and C20:0). The x-axis represents the chromosomes, and y-axis represents the  $-\log_{10}(p\_value)$ . The green line is genome-wide level threshold, the green dashed line is chromosome-level threshold.

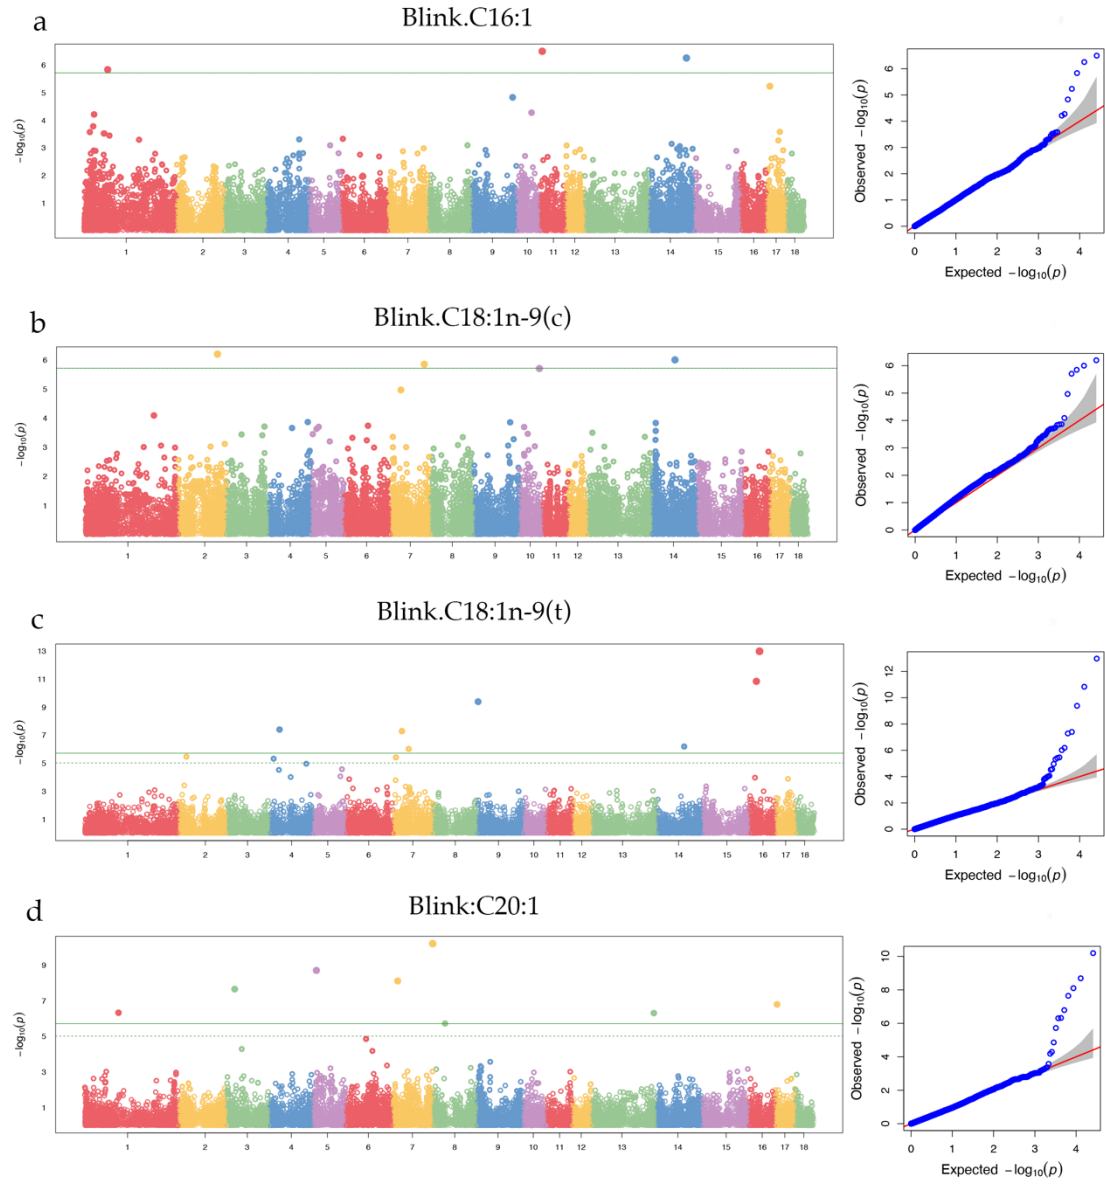

**Figure S2.** Manhattan plot for four MUFAs (C16:1, C18:1n-9(c), C18:1n-9(t), and C20:1). The x-axis represents the chromosomes, and y-axis represents the  $-\log_{10}(p\_value)$ . The green line is genome-wide level threshold, the green dashed line is chromosome-level threshold.

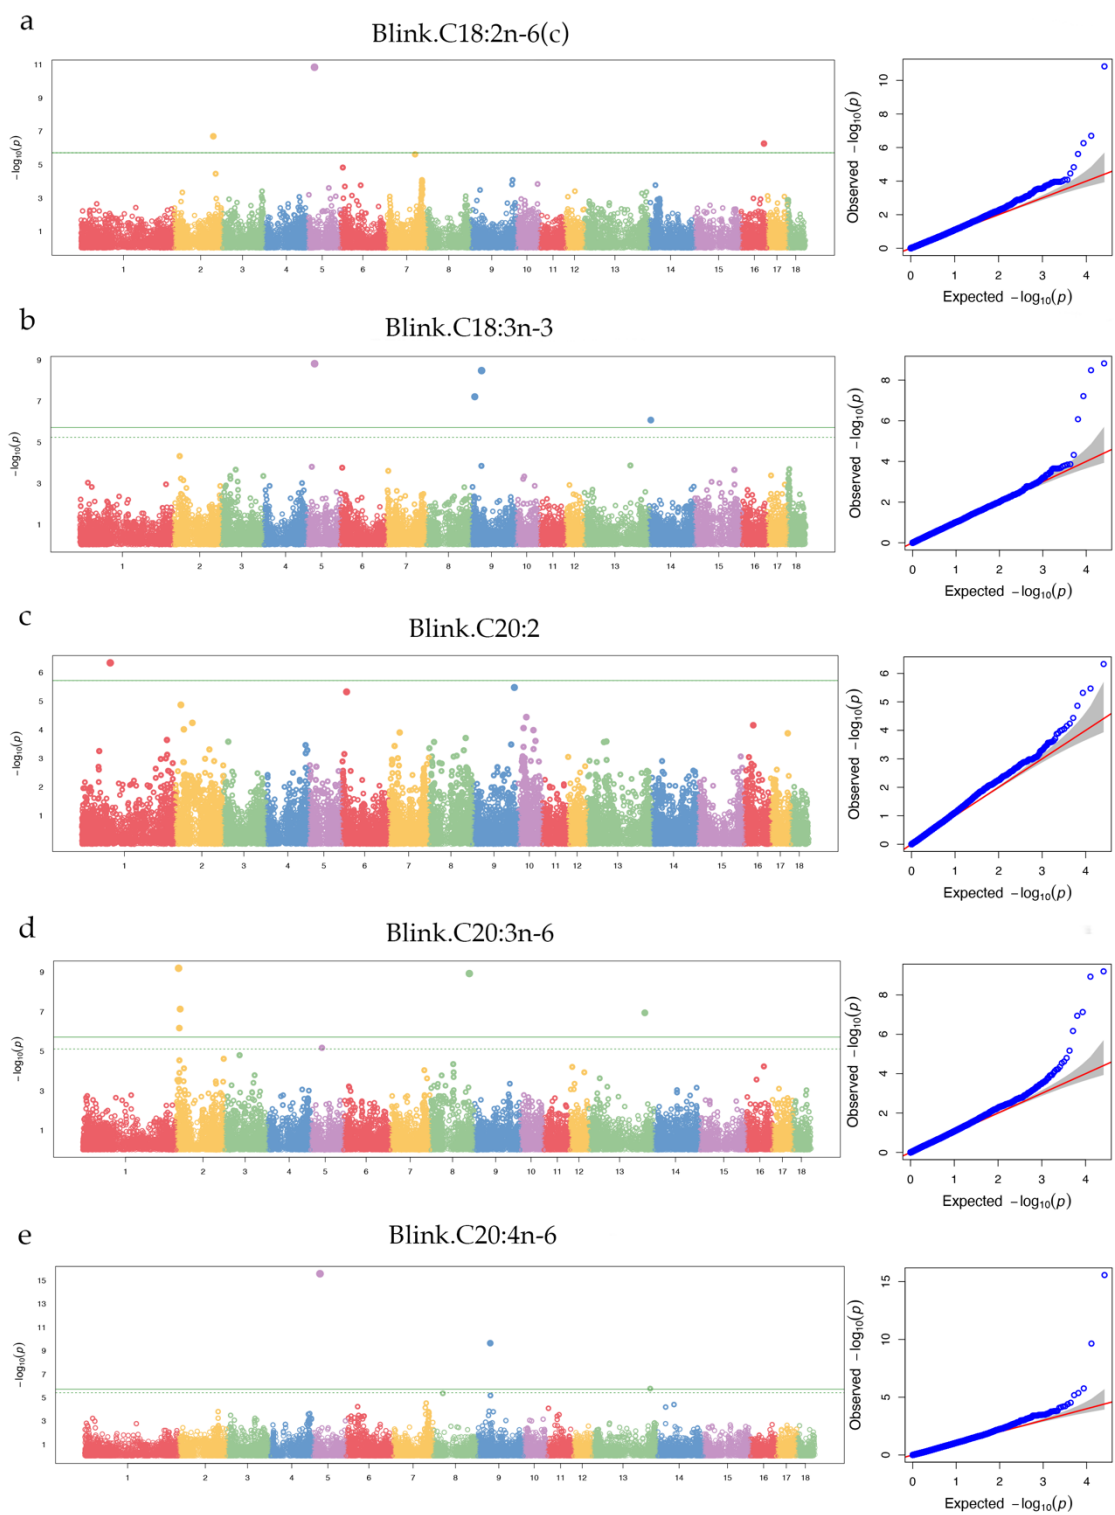

**Figure S3.** Manhattan plot for five PUFAs (C18:2n-6(c), C18:3n-3, C20:2, C20:3n-6, and C20:4n-6). The x-axis represents the chromosomes, and y-axis represents the  $-\log_{10}(p_{\text{value}})$ . The green line is genome-wide level threshold, the green dashed line is chromosome-level threshold.
