# Supplementary material for: Genome-Wide Association Study and Identification of Candidate Genes for Intramuscular Fat Fatty Acid Composition in Ningxiang Pigs
Source: Animals (Basel). 2023 Oct 13;13(20):3192. doi: 10.3390/ani13203192 (PMC10603709; doi:10.3390/ani13203192)
Supplement: Supplementary file 1 [file animals-13-03192-s001.zip › File S1.xlsx]

## Sheet: Sheet1
source	term_name	term_id	adjusted_p_value	negative_log10_of_adjusted_p_value	term_size	query_size	intersection_size	effective_domain_size	intersections
GO:MF	molecular_function	GO:0003674	1.36899e-37	36.8636	17833	374	310	35670	CLIP4,TRMT61B,PPP1CB,SPDYA,PLB1,HNRNPU,EFCAB2,HAND1,SAP30L,GALNT10,CAMKMT,PREPL,PPM1B,LRPPRC,RAP1A,ADORA3,WDR77,OVGP1,PGB,CEPT1,CHIA,CHI3L2,LRIF1,CD53,KCNA3,CDK12,MED1,FBXL20,STAC2,RPL19,NPEPPS,KPNB1,TBX21,OSBPL7,MRPL10,LRRC46,SCRN2,SP6,PNPO,NFE2L1,CDK5RAP3,SP2,SKAP1,SNX11,CA10,MBNL1,P2RY1,RAP2B,LIN28B,POPDC3,PREP,KATNAL1,HMGB1,USPL1,ALOX5AP,HSPH1,ACP1,CCDC181,BLZF1,NME7,ATP1B1,XCL1,TSPO2,TREML1,…
GO:MF	binding	GO:0005488	1.49229e-25	24.8261	13288	377	246	35670	CLIP4,PPP1CB,SPDYA,HNRNPU,EFCAB2,HAND1,SAP30L,GALNT10,CAMKMT,PPM1B,LRPPRC,RAP1A,WDR77,OVGP1,CHIA,CHI3L2,LRIF1,CD53,KCNA3,CDK12,MED1,FBXL20,STAC2,RPL19,NPEPPS,KPNB1,TBX21,OSBPL7,LRRC46,SP6,PNPO,NFE2L1,CDK5RAP3,SP2,SKAP1,SNX11,CA10,MBNL1,P2RY1,RAP2B,LIN28B,POPDC3,KATNAL1,HMGB1,USPL1,ALOX5AP,HSPH1,CCDC181,BLZF1,NME7,ATP1B1,XCL1,TSPO2,TREM2,TREM-1,FOXP4,SSTR2,USP25,MAP3K1,SETD9,GPBP1,FPGS,ENG,AK1,PIP…
GO:MF	protein binding	GO:0005515	2.58298e-18	17.5879	7415	322	142	35670	CLIP4,PPP1CB,SPDYA,HNRNPU,HAND1,SAP30L,CAMKMT,LRPPRC,RAP1A,WDR77,CHIA,LRIF1,CD53,KCNA3,CDK12,MED1,FBXL20,STAC2,KPNB1,LRRC46,PNPO,NFE2L1,CDK5RAP3,SP2,SKAP1,P2RY1,RAP2B,KATNAL1,USPL1,HSPH1,CCDC181,BLZF1,ATP1B1,XCL1,TREM2,TREM-1,SSTR2,USP25,MAP3K1,SETD9,ENG,LCN2,CIZ1,DNM1,CERCAM,GLE1,SPTAN1,WDR34,SET,PKN3,TBC1D13,ENDOG,RNF6,WASF3,KLHL1,DKK1,SLIT1,MMS19,UBTD1,ANKRD2,HOGA1,ZFYVE27,SFRP5,PRDM6,FLRT2,SI…
GO:MF	catalytic activity	GO:0003824	5.36262e-15	14.2706	5390	362	120	35670	TRMT61B,PPP1CB,PLB1,GALNT10,CAMKMT,PREPL,PPM1B,RAP1A,PGB,CEPT1,CHIA,CDK12,NPEPPS,SCRN2,PNPO,SKAP1,CA10,RAP2B,PREP,KATNAL1,USPL1,ACP1,NME7,USP25,MAP3K1,FPGS,AK1,ST6GALNAC6,ST6GALNAC2,PIP5KL1,PTGES2,DNM1,PKN3,ZDHHC12,ENDOG,ATP8A2,RNF6,CDK8,USP12,PRKG1,HOGA1,LOXL4,PRDM6,CSNK1G3,SIRT1,HERC4,PBLD,DDX50,DDX21,PSMB8,PSMB9,BRD2,RING1,HSD17B8,HMGCLL1,MCM3,HYKK,IREB2,OVCH2,SKP2,NADK2,PTGES3,HSD17B6,PRIM1,S…
GO:MF	ion binding	GO:0043167	9.79979e-10	9.00878	4712	376	101	35670	PPP1CB,HNRNPU,EFCAB2,SAP30L,PPM1B,RAP1A,CDK12,NPEPPS,PNPO,CA10,MBNL1,P2RY1,RAP2B,LIN28B,POPDC3,KATNAL1,ALOX5AP,HSPH1,NME7,FOXP4,MAP3K1,FPGS,AK1,PIP5KL1,SLC25A25,LCN2,CIZ1,DNM1,GLE1,SPTAN1,PKN3,ENDOG,ATP8A2,RNF6,CDK8,PRKG1,SLIT1,ZFYVE27,LOXL4,CSNK1G3,SIRT1,RUFY2,DDX50,DDX21,TAP2,TAP1,RING1,HSD17B8,RXRB,HMGCLL1,MCM3,IREB2,SYT9,CAPSL,NADK2,ISL1,PRIM1,NMUR2,GLRA1,MMP13,ACCS,PDE7A,ARMC1,MICAL3,POLR2B,…
GO:MF	carbohydrate derivative binding	GO:0097367	5.96145e-07	6.22465	1951	160	31	35670	HNRNPU,RAP1A,OVGP1,CHIA,CHI3L2,CDK12,PNPO,P2RY1,RAP2B,POPDC3,KATNAL1,HSPH1,NME7,TREM2,MAP3K1,FPGS,ENG,AK1,PIP5KL1,DNM1,PKN3,ATP8A2,CDK8,PRKG1,SLIT1,CSNK1G3,DDX50,DDX21,RSPO2,TAP2,TAP1
GO:MF	metal ion binding	GO:0046872	6.31071e-07	6.19992	2950	376	68	35670	PPP1CB,EFCAB2,SAP30L,PPM1B,NPEPPS,CA10,MBNL1,LIN28B,NME7,FOXP4,MAP3K1,FPGS,SLC25A25,LCN2,CIZ1,SPTAN1,ENDOG,ATP8A2,RNF6,SLIT1,ZFYVE27,LOXL4,RUFY2,RING1,RXRB,HMGCLL1,IREB2,SYT9,CAPSL,ISL1,PRIM1,GLRA1,MMP13,PDE7A,ARMC1,MICAL3,POLR2B,EFHB,ZFAND4,ALOX5,ITGA1,PELO,ITGA2,SLIT3,TENM2,ERI2,UMOD,CDKAL1,GCM1,MORC3,ESRRA,PLCB3,NUDT22,MARK2,FEN1,SYT7,CYB561A3,VWCE,LPXN,YPEL4,ADH7,ADH4,ADH5,METAP1,PAN2,MYL6,BA…
GO:MF	small molecule binding	GO:0036094	9.58189e-07	6.01855	2221	258	44	35670	HNRNPU,RAP1A,WDR77,CDK12,OSBPL7,PNPO,P2RY1,RAP2B,POPDC3,KATNAL1,ALOX5AP,HSPH1,NME7,TSPO2,MAP3K1,FPGS,ENG,AK1,PIP5KL1,LCN2,DNM1,GLE1,PKN3,ATP8A2,CDK8,PRKG1,CSNK1G3,SIRT1,DDX50,DDX21,TAP2,TAP1,HSD17B8,MCM3,NADK2,PRIM1,NMUR2,GLRA1,ACCS,MICAL3,POLR2B,MOCS2,PANK3,MBD2
GO:MF	cation binding	GO:0043169	1.97798e-06	5.70378	3033	376	68	35670	PPP1CB,EFCAB2,SAP30L,PPM1B,NPEPPS,CA10,MBNL1,LIN28B,NME7,FOXP4,MAP3K1,FPGS,SLC25A25,LCN2,CIZ1,SPTAN1,ENDOG,ATP8A2,RNF6,SLIT1,ZFYVE27,LOXL4,RUFY2,RING1,RXRB,HMGCLL1,IREB2,SYT9,CAPSL,ISL1,PRIM1,GLRA1,MMP13,PDE7A,ARMC1,MICAL3,POLR2B,EFHB,ZFAND4,ALOX5,ITGA1,PELO,ITGA2,SLIT3,TENM2,ERI2,UMOD,CDKAL1,GCM1,MORC3,ESRRA,PLCB3,NUDT22,MARK2,FEN1,SYT7,CYB561A3,VWCE,LPXN,YPEL4,ADH7,ADH4,ADH5,METAP1,PAN2,MYL6,BA…
GO:MF	transferase activity	GO:0016740	9.48323e-06	5.02304	2177	323	48	35670	TRMT61B,GALNT10,CAMKMT,CEPT1,CDK12,SKAP1,NME7,MAP3K1,AK1,ST6GALNAC6,ST6GALNAC2,PIP5KL1,PKN3,ZDHHC12,RNF6,CDK8,PRKG1,PRDM6,CSNK1G3,SIRT1,HERC4,BRD2,RING1,HYKK,SKP2,NADK2,PTGES3,PRIM1,EXT2,ACCS,CLOCK,POLR2B,KAT2B,MOCS2,PANK3,FBLL1,ACSM3,ACSM4,ACSM5,CDKAL1,GSTA4,PIGP,TTC3,TTK,TRMT112,TRPT1,NAA40,MARK2
GO:MF	chitin binding	GO:0008061	1.64001e-05	4.78515	8	26	3	35670	OVGP1,CHIA,CHI3L2
GO:MF	catalytic activity, acting on a protein	GO:0140096	5.54576e-05	4.25604	2167	165	30	35670	PPP1CB,GALNT10,CAMKMT,PREPL,PPM1B,PGB,CDK12,NPEPPS,SCRN2,PREP,KATNAL1,USPL1,ACP1,USP25,MAP3K1,PKN3,ZDHHC12,RNF6,CDK8,USP12,PRKG1,LOXL4,PRDM6,CSNK1G3,SIRT1,HERC4,PSMB8,PSMB9,BRD2,RING1
GO:MF	anion binding	GO:0043168	7.75961e-05	4.11016	2119	219	35	35670	HNRNPU,RAP1A,CDK12,PNPO,P2RY1,RAP2B,POPDC3,KATNAL1,ALOX5AP,HSPH1,NME7,MAP3K1,FPGS,AK1,PIP5KL1,LCN2,DNM1,GLE1,PKN3,ATP8A2,CDK8,PRKG1,CSNK1G3,SIRT1,DDX50,DDX21,TAP2,TAP1,HSD17B8,MCM3,SYT9,NADK2,NMUR2,GLRA1,ACCS
GO:MF	enzyme binding	GO:0019899	0.000238098	3.62324	1627	322	37	35670	PPP1CB,SPDYA,HNRNPU,HAND1,LRPPRC,RAP1A,CHIA,CDK12,KPNB1,CDK5RAP3,SP2,SKAP1,BLZF1,ATP1B1,USP25,MAP3K1,DNM1,PKN3,TBC1D13,MMS19,SIRT1,GFRAL,PTGES3,STAT6,DCUN1D5,IPO8,BID,MICAL3,KAT2B,ITGA1,DCUN1D3,CRY1,GCM1,DCUN1D4,BAD,OTUB1,RCOR2
GO:MF	nucleotide binding	GO:0000166	0.000265613	3.57575	1924	177	28	35670	HNRNPU,RAP1A,WDR77,CDK12,PNPO,P2RY1,RAP2B,POPDC3,KATNAL1,HSPH1,NME7,MAP3K1,FPGS,AK1,PIP5KL1,DNM1,PKN3,ATP8A2,CDK8,PRKG1,CSNK1G3,SIRT1,DDX50,DDX21,TAP2,TAP1,HSD17B8,MCM3
GO:MF	nucleoside phosphate binding	GO:1901265	0.000265613	3.57575	1924	177	28	35670	HNRNPU,RAP1A,WDR77,CDK12,PNPO,P2RY1,RAP2B,POPDC3,KATNAL1,HSPH1,NME7,MAP3K1,FPGS,AK1,PIP5KL1,DNM1,PKN3,ATP8A2,CDK8,PRKG1,CSNK1G3,SIRT1,DDX50,DDX21,TAP2,TAP1,HSD17B8,MCM3
GO:MF	organic cyclic compound binding	GO:0097159	0.000427927	3.36863	6134	304	87	35670	HNRNPU,HAND1,SAP30L,LRPPRC,RAP1A,WDR77,CDK12,MED1,RPL19,TBX21,OSBPL7,SP6,PNPO,NFE2L1,SP2,MBNL1,P2RY1,RAP2B,LIN28B,POPDC3,KATNAL1,HMGB1,HSPH1,NME7,TSPO2,FOXP4,MAP3K1,GPBP1,FPGS,AK1,PIP5KL1,PTGES2,LCN2,CIZ1,DNM1,PKN3,ENDOG,ATP8A2,CDK8,PRKG1,EXOSC1,CSNK1G3,SIRT1,ATOH7,HNRNPH3,CCAR1,STOX1,DDX50,DDX21,EIF3E,TAP2,TAP1,HSD17B8,RXRB,MCM3,IREB2,NADK2,ISL1,PRIM1,STAT6,ZBTB39,STAC3,NMUR2,ACCS,MEF2C,MICAL3,C…
GO:MF	ribonucleotide binding	GO:0032553	0.000561982	3.25028	1702	160	24	35670	HNRNPU,RAP1A,CDK12,PNPO,P2RY1,RAP2B,POPDC3,KATNAL1,HSPH1,NME7,MAP3K1,FPGS,AK1,PIP5KL1,DNM1,PKN3,ATP8A2,CDK8,PRKG1,CSNK1G3,DDX50,DDX21,TAP2,TAP1
GO:MF	purine nucleotide binding	GO:0017076	0.000751621	3.124	1788	177	26	35670	HNRNPU,RAP1A,CDK12,P2RY1,RAP2B,POPDC3,KATNAL1,HSPH1,NME7,MAP3K1,FPGS,AK1,PIP5KL1,DNM1,PKN3,ATP8A2,CDK8,PRKG1,CSNK1G3,SIRT1,DDX50,DDX21,TAP2,TAP1,HSD17B8,MCM3
GO:MF	adenyl nucleotide binding	GO:0030554	0.000782765	3.10637	1448	177	23	35670	HNRNPU,CDK12,P2RY1,POPDC3,KATNAL1,HSPH1,NME7,MAP3K1,FPGS,AK1,PIP5KL1,PKN3,ATP8A2,CDK8,PRKG1,CSNK1G3,SIRT1,DDX50,DDX21,TAP2,TAP1,HSD17B8,MCM3
GO:MF	heterocyclic compound binding	GO:1901363	0.00108292	2.9654	6074	304	85	35670	HNRNPU,HAND1,SAP30L,LRPPRC,RAP1A,WDR77,CDK12,MED1,RPL19,TBX21,SP6,PNPO,NFE2L1,SP2,MBNL1,P2RY1,RAP2B,LIN28B,POPDC3,KATNAL1,HMGB1,HSPH1,NME7,FOXP4,MAP3K1,GPBP1,FPGS,AK1,PIP5KL1,PTGES2,LCN2,CIZ1,DNM1,PKN3,ENDOG,ATP8A2,CDK8,PRKG1,EXOSC1,CSNK1G3,SIRT1,ATOH7,HNRNPH3,CCAR1,STOX1,DDX50,DDX21,EIF3E,TAP2,TAP1,HSD17B8,RXRB,MCM3,IREB2,NADK2,ISL1,PRIM1,STAT6,ZBTB39,STAC3,NMUR2,ACCS,MEF2C,MICAL3,CLOCK,POLR2B,K…
GO:MF	fatty-acyl-CoA synthase activity	GO:0004321	0.00137737	2.86095	4	265	3	35670	ACSM3,ACSM4,ACSM5
GO:MF	purine ribonucleotide binding	GO:0032555	0.00174154	2.75907	1687	160	23	35670	HNRNPU,RAP1A,CDK12,P2RY1,RAP2B,POPDC3,KATNAL1,HSPH1,NME7,MAP3K1,FPGS,AK1,PIP5KL1,DNM1,PKN3,ATP8A2,CDK8,PRKG1,CSNK1G3,DDX50,DDX21,TAP2,TAP1
GO:MF	DNA binding	GO:0003677	0.00249593	2.60277	1995	374	44	35670	HNRNPU,HAND1,SAP30L,LRPPRC,WDR77,MED1,TBX21,SP6,NFE2L1,SP2,LIN28B,HMGB1,FOXP4,GPBP1,PTGES2,SIRT1,ATOH7,CCAR1,STOX1,RXRB,MCM3,ISL1,STAT6,ZBTB39,MEF2C,CLOCK,POLR2B,KAT2B,ZNF22,MBD2,CRY1,MTERF2,RFX4,E2F3,GCM1,SIM2,PRDX5,ESRRA,FEN1,MYRF,DDB1,STAT2,TIMELESS,BAZ2A
GO:MF	adenyl ribonucleotide binding	GO:0032559	0.00270075	2.56852	1356	160	20	35670	HNRNPU,CDK12,P2RY1,POPDC3,KATNAL1,HSPH1,NME7,MAP3K1,FPGS,AK1,PIP5KL1,PKN3,ATP8A2,CDK8,PRKG1,CSNK1G3,DDX50,DDX21,TAP2,TAP1
GO:MF	purine ribonucleoside triphosphate binding	GO:0035639	0.00377591	2.42298	1638	160	22	35670	HNRNPU,RAP1A,CDK12,P2RY1,RAP2B,KATNAL1,HSPH1,NME7,MAP3K1,FPGS,AK1,PIP5KL1,DNM1,PKN3,ATP8A2,CDK8,PRKG1,CSNK1G3,DDX50,DDX21,TAP2,TAP1
GO:MF	double-stranded DNA binding	GO:0003690	0.00549819	2.25978	1286	304	28	35670	HNRNPU,HAND1,TBX21,SP6,NFE2L1,SP2,LIN28B,HMGB1,FOXP4,SIRT1,ATOH7,CCAR1,STOX1,RXRB,ISL1,STAT6,ZBTB39,MEF2C,CLOCK,KAT2B,CRY1,MTERF2,RFX4,E2F3,GCM1,SIM2,PRDX5,ESRRA
GO:MF	ATP binding	GO:0005524	0.00656485	2.18278	1316	160	19	35670	HNRNPU,CDK12,P2RY1,KATNAL1,HSPH1,NME7,MAP3K1,FPGS,AK1,PIP5KL1,PKN3,ATP8A2,CDK8,PRKG1,CSNK1G3,DDX50,DDX21,TAP2,TAP1
GO:MF	MHC class II protein complex binding	GO:0023026	0.00658591	2.18138	9	163	3	35670	SLA-DOB,SLA-DMB,SLA-DMA
GO:MF	non-sequence-specific DNA binding, bending	GO:0044378	0.00736185	2.13301	3	61	2	35670	SAP30L,HMGB1
GO:MF	transferase activity, transferring phosphorus-containing groups	GO:0016772	0.0102619	1.98877	887	200	17	35670	CEPT1,CDK12,SKAP1,NME7,MAP3K1,AK1,PIP5KL1,PKN3,CDK8,PRKG1,CSNK1G3,BRD2,HYKK,SKP2,NADK2,PTGES3,PRIM1
GO:MF	RNA polymerase II-specific DNA-binding transcription factor binding	GO:0061629	0.0115499	1.93742	288	220	10	35670	HAND1,LRIF1,MED1,CDK5RAP3,RNF6,MMS19,ANKRD2,SIRT1,ISL1,MEF2C
GO:MF	identical protein binding	GO:0042802	0.0120359	1.91952	1571	219	25	35670	HNRNPU,HAND1,CD53,PNPO,NFE2L1,KATNAL1,ENG,LCN2,DNM1,CERCAM,GLE1,ENDOG,HOGA1,ZFYVE27,PRDM6,SIRT1,PBLD,DDX21,IL17A,SYT9,SKP2,NADK2,STAT6,SLC16A7,ACCS
GO:MF	sequence-specific DNA binding	GO:0043565	0.013502	1.8696	1351	304	28	35670	HNRNPU,HAND1,WDR77,TBX21,SP6,NFE2L1,SP2,LIN28B,FOXP4,SIRT1,ATOH7,CCAR1,STOX1,RXRB,ISL1,STAT6,ZBTB39,MEF2C,CLOCK,KAT2B,MBD2,CRY1,RFX4,E2F3,GCM1,SIM2,PRDX5,ESRRA
GO:MF	NAD-retinol dehydrogenase activity	GO:0004745	0.0144088	1.84137	16	360	4	35670	HSD17B6,SDR9C7,ADH7,ADH4
GO:MF	hydrolase activity	GO:0016787	0.0144625	1.83976	2198	376	45	35670	PPP1CB,PLB1,PREPL,PPM1B,RAP1A,PGB,CHIA,NPEPPS,SCRN2,RAP2B,PREP,KATNAL1,USPL1,ACP1,USP25,DNM1,ENDOG,ATP8A2,USP12,SIRT1,DDX50,DDX21,PSMB8,PSMB9,MCM3,OVCH2,MMP13,PDE7A,PP2D1,PARG,PELO,USP46,RASL11B,MORC3,PLCB3,NUDT22,MACROD1,OTUB1,FEN1,DAGLA,PGA,PPAG3,METAP1,PAN2,ZC3H12C
GO:MF	transcription cis-regulatory region binding	GO:0000976	0.0153168	1.81483	1139	304	25	35670	HNRNPU,HAND1,TBX21,SP6,NFE2L1,SP2,FOXP4,SIRT1,ATOH7,CCAR1,STOX1,RXRB,ISL1,STAT6,ZBTB39,MEF2C,CLOCK,KAT2B,CRY1,RFX4,E2F3,GCM1,SIM2,PRDX5,ESRRA
GO:MF	transcription regulatory region nucleic acid binding	GO:0001067	0.015541	1.80852	1140	304	25	35670	HNRNPU,HAND1,TBX21,SP6,NFE2L1,SP2,FOXP4,SIRT1,ATOH7,CCAR1,STOX1,RXRB,ISL1,STAT6,ZBTB39,MEF2C,CLOCK,KAT2B,CRY1,RFX4,E2F3,GCM1,SIM2,PRDX5,ESRRA
GO:MF	sequence-specific double-stranded DNA binding	GO:1990837	0.0159988	1.79591	1215	304	26	35670	HNRNPU,HAND1,TBX21,SP6,NFE2L1,SP2,LIN28B,FOXP4,SIRT1,ATOH7,CCAR1,STOX1,RXRB,ISL1,STAT6,ZBTB39,MEF2C,CLOCK,KAT2B,CRY1,RFX4,E2F3,GCM1,SIM2,PRDX5,ESRRA
GO:MF	MHC protein complex binding	GO:0023023	0.0170755	1.76763	12	163	3	35670	SLA-DOB,SLA-DMB,SLA-DMA
GO:MF	alcohol dehydrogenase [NAD(P)+] activity	GO:0018455	0.0298154	1.52556	7	361	3	35670	ADH7,ADH4,ADH5
GO:MF	alcohol dehydrogenase (NAD+) activity	GO:0004022	0.0298154	1.52556	7	361	3	35670	ADH7,ADH4,ADH5
GO:MF	RNA polymerase II transcription regulatory region sequence-specific DNA binding	GO:0000977	0.0334286	1.47588	1048	304	23	35670	HNRNPU,HAND1,TBX21,SP6,NFE2L1,SP2,FOXP4,SIRT1,ATOH7,CCAR1,STOX1,RXRB,STAT6,ZBTB39,MEF2C,CLOCK,KAT2B,CRY1,RFX4,E2F3,GCM1,SIM2,ESRRA
GO:MF	DNA-binding transcription factor binding	GO:0140297	0.0401193	1.39665	386	272	12	35670	HAND1,LRIF1,MED1,CDK5RAP3,RNF6,MMS19,ANKRD2,SIRT1,ISL1,MEF2C,KAT2B,CRY1
GO:MF	transcription regulator activity	GO:0140110	0.0410128	1.38708	1517	304	29	35670	HNRNPU,HAND1,SAP30L,WDR77,MED1,TBX21,SP6,NFE2L1,SP2,FOXP4,GPBP1,MMS19,SIRT1,ATOH7,CCAR1,STOX1,RXRB,ISL1,STAT6,ZBTB39,MEF2C,CLOCK,KAT2B,NCOA4,RFX4,E2F3,GCM1,SIM2,ESRRA
GO:BP	biological_process	GO:0008150	3.05808e-44	43.5146	19136	365	324	35670	CLIP4,TRMT61B,PPP1CB,SPDYA,PLB1,HNRNPU,HAND1,SAP30L,GALNT10,CAMKMT,PREPL,PPM1B,SNORA25,LRPPRC,RAP1A,ADORA3,WDR77,OVGP1,PGB,CEPT1,CHIA,CHI3L2,DRAM2,LRIF1,CD53,KCNA3,CDK12,MED1,FBXL20,STAC2,RPL19,PLXDC1,NPEPPS,KPNB1,TBX21,OSBPL7,MRPL10,SCRN2,SP6,PNPO,NFE2L1,CDK5RAP3,SP2,SKAP1,SNX11,MBNL1,P2RY1,RAP2B,LIN28B,POPDC3,PREP,KATNAL1,HMGB1,USPL1,ALOX5AP,MEDAG,HSPH1,ACP1,BLZF1,NME7,ATP1B1,DPT,XCL1,TSPO2,TRE…
GO:BP	cellular process	GO:0009987	3.52438e-29	28.4529	17430	355	282	35670	CLIP4,TRMT61B,PPP1CB,SPDYA,HNRNPU,HAND1,SAP30L,CAMKMT,PREPL,PPM1B,SNORA25,LRPPRC,RAP1A,ADORA3,WDR77,CEPT1,DRAM2,LRIF1,CD53,KCNA3,CDK12,MED1,FBXL20,STAC2,RPL19,NPEPPS,KPNB1,TBX21,OSBPL7,MRPL10,SP6,PNPO,NFE2L1,CDK5RAP3,SP2,SKAP1,SNX11,MBNL1,P2RY1,RAP2B,LIN28B,POPDC3,KATNAL1,HMGB1,USPL1,ALOX5AP,MEDAG,HSPH1,ACP1,BLZF1,NME7,ATP1B1,DPT,XCL1,TSPO2,TREML1,TREM2,FOXP4,CDC42EP4,COG1,SSTR2,SLC39A11,USP25,MA…
GO:BP	metabolic process	GO:0008152	1.91175e-20	19.7186	12038	371	220	35670	TRMT61B,PPP1CB,SPDYA,PLB1,HNRNPU,HAND1,SAP30L,GALNT10,CAMKMT,PREPL,PPM1B,SNORA25,LRPPRC,ADORA3,WDR77,OVGP1,PGB,CEPT1,CHIA,CHI3L2,DRAM2,LRIF1,CDK12,MED1,FBXL20,RPL19,NPEPPS,TBX21,OSBPL7,MRPL10,SCRN2,SP6,PNPO,NFE2L1,CDK5RAP3,SP2,SKAP1,MBNL1,RAP2B,LIN28B,PREP,HMGB1,USPL1,ALOX5AP,ACP1,NME7,ATP1B1,XCL1,TREM2,FOXP4,COG1,USP25,SSC-LET-7C,MAP3K1,GPBP1,FPGS,ENG,AK1,ST6GALNAC6,ST6GALNAC2,PIP5KL1,DPM2,SLC25…
GO:BP	organic substance metabolic process	GO:0071704	5.27617e-20	19.2777	11596	371	214	35670	TRMT61B,PPP1CB,SPDYA,PLB1,HNRNPU,HAND1,SAP30L,GALNT10,CAMKMT,PREPL,PPM1B,SNORA25,LRPPRC,ADORA3,WDR77,OVGP1,PGB,CEPT1,CHIA,CHI3L2,LRIF1,CDK12,MED1,FBXL20,RPL19,NPEPPS,TBX21,OSBPL7,MRPL10,SCRN2,SP6,PNPO,NFE2L1,CDK5RAP3,SP2,SKAP1,MBNL1,RAP2B,LIN28B,PREP,HMGB1,USPL1,ALOX5AP,ACP1,NME7,ATP1B1,XCL1,TREM2,FOXP4,USP25,SSC-LET-7C,MAP3K1,GPBP1,FPGS,ENG,AK1,ST6GALNAC6,ST6GALNAC2,PIP5KL1,DPM2,SLC25A25,PTGES2,…
GO:BP	biological regulation	GO:0065007	4.72176e-18	17.3259	11675	372	211	35670	PPP1CB,SPDYA,PLB1,HNRNPU,HAND1,SAP30L,PREPL,PPM1B,LRPPRC,RAP1A,ADORA3,WDR77,CHIA,DRAM2,LRIF1,CD53,KCNA3,CDK12,MED1,FBXL20,STAC2,KPNB1,TBX21,OSBPL7,SP6,NFE2L1,CDK5RAP3,SP2,SKAP1,MBNL1,P2RY1,RAP2B,LIN28B,POPDC3,HMGB1,ALOX5AP,MEDAG,ATP1B1,DPT,XCL1,TREML1,TREM2,FOXP4,CDC42EP4,SSTR2,USP25,SSC-LET-7C,GPBP1,ENG,PIP5KL1,DPM2,PTGES2,CIZ1,DNM1,ODF2,GLE1,SPTAN1,PKN3,ZDHHC12,TBC1D13,ENDOG,ATP8A2,RNF6,CDK8,WA…
GO:BP	organonitrogen compound metabolic process	GO:1901564	2.02336e-17	16.6939	5650	369	132	35670	SPDYA,HNRNPU,GALNT10,CAMKMT,PREPL,PPM1B,LRPPRC,PGB,CEPT1,CHIA,CDK12,MED1,FBXL20,RPL19,NPEPPS,TBX21,OSBPL7,MRPL10,SCRN2,PNPO,CDK5RAP3,RAP2B,PREP,HMGB1,USPL1,ACP1,NME7,ATP1B1,TREM2,USP25,MAP3K1,FPGS,ENG,AK1,ST6GALNAC6,ST6GALNAC2,PIP5KL1,DPM2,SLC25A25,URM1,GLE1,PKN3,ZDHHC12,RNF6,CDK8,USP12,DKK1,PRKG1,MMS19,HOGA1,LOXL4,PRDM6,CSNK1G3,SIRT1,HERC4,STOX1,EIF3E,PSMB8,PSMB9,BRD2,RING1,BMP5,HMGCLL1,PSMA4,IR…
GO:BP	primary metabolic process	GO:0044238	6.47732e-16	15.1886	10851	371	196	35670	TRMT61B,PPP1CB,SPDYA,PLB1,HNRNPU,HAND1,SAP30L,GALNT10,CAMKMT,PREPL,PPM1B,SNORA25,LRPPRC,ADORA3,WDR77,OVGP1,PGB,CEPT1,CHIA,CHI3L2,LRIF1,CDK12,MED1,FBXL20,RPL19,NPEPPS,TBX21,OSBPL7,MRPL10,SCRN2,SP6,NFE2L1,CDK5RAP3,SP2,SKAP1,MBNL1,RAP2B,LIN28B,PREP,HMGB1,USPL1,ACP1,NME7,ATP1B1,TREM2,FOXP4,USP25,MAP3K1,GPBP1,FPGS,ENG,AK1,ST6GALNAC6,ST6GALNAC2,PIP5KL1,DPM2,SLC25A25,PTGES2,CIZ1,SWI5,URM1,GLE1,PKN3,ZDHH…
GO:BP	regulation of biological process	GO:0050789	8.04211e-15	14.0946	11216	372	198	35670	PPP1CB,SPDYA,PLB1,HNRNPU,HAND1,SAP30L,PREPL,PPM1B,LRPPRC,RAP1A,ADORA3,WDR77,CHIA,DRAM2,LRIF1,CD53,KCNA3,CDK12,MED1,FBXL20,STAC2,KPNB1,TBX21,OSBPL7,SP6,NFE2L1,CDK5RAP3,SP2,SKAP1,MBNL1,P2RY1,RAP2B,LIN28B,HMGB1,MEDAG,ATP1B1,DPT,XCL1,TREM2,FOXP4,CDC42EP4,SSTR2,USP25,SSC-LET-7C,GPBP1,ENG,PIP5KL1,PTGES2,CIZ1,DNM1,ODF2,GLE1,SPTAN1,PKN3,ZDHHC12,ENDOG,ATP8A2,RNF6,CDK8,WASF3,DKK1,PRKG1,MMS19,ANKRD2,AVPI1,Z…
GO:BP	nitrogen compound metabolic process	GO:0006807	1.80372e-13	12.7438	10348	371	184	35670	TRMT61B,SPDYA,HNRNPU,HAND1,SAP30L,GALNT10,CAMKMT,PREPL,PPM1B,SNORA25,LRPPRC,ADORA3,WDR77,PGB,CEPT1,CHIA,LRIF1,CDK12,MED1,FBXL20,RPL19,NPEPPS,TBX21,OSBPL7,MRPL10,SCRN2,SP6,PNPO,NFE2L1,CDK5RAP3,SP2,SKAP1,MBNL1,RAP2B,LIN28B,PREP,HMGB1,USPL1,ACP1,NME7,ATP1B1,TREM2,FOXP4,USP25,MAP3K1,GPBP1,FPGS,ENG,AK1,ST6GALNAC6,ST6GALNAC2,PIP5KL1,DPM2,SLC25A25,PTGES2,CIZ1,SWI5,URM1,GLE1,PKN3,ZDHHC12,ENDOG,RNF6,CDK8,…
GO:BP	regulation of cellular process	GO:0050794	2.44777e-13	12.6112	10260	372	183	35670	PPP1CB,SPDYA,HNRNPU,HAND1,SAP30L,PREPL,PPM1B,LRPPRC,RAP1A,ADORA3,WDR77,DRAM2,LRIF1,CD53,KCNA3,CDK12,MED1,FBXL20,STAC2,KPNB1,TBX21,SP6,NFE2L1,CDK5RAP3,SP2,SKAP1,MBNL1,P2RY1,RAP2B,LIN28B,HMGB1,MEDAG,ATP1B1,DPT,XCL1,TREM2,FOXP4,CDC42EP4,SSTR2,USP25,GPBP1,ENG,PIP5KL1,PTGES2,CIZ1,DNM1,ODF2,GLE1,SPTAN1,PKN3,ZDHHC12,ENDOG,ATP8A2,RNF6,CDK8,WASF3,DKK1,PRKG1,MMS19,ANKRD2,AVPI1,ZFYVE27,SFRP5,PRDM6,CEP120,CS…
GO:BP	macromolecule metabolic process	GO:0043170	1.90892e-12	11.7192	10236	371	180	35670	TRMT61B,PPP1CB,SPDYA,HNRNPU,HAND1,SAP30L,GALNT10,CAMKMT,PREPL,PPM1B,SNORA25,LRPPRC,ADORA3,WDR77,PGB,CHIA,LRIF1,CDK12,MED1,FBXL20,RPL19,NPEPPS,TBX21,OSBPL7,MRPL10,SCRN2,SP6,NFE2L1,CDK5RAP3,SP2,SKAP1,MBNL1,RAP2B,LIN28B,PREP,HMGB1,USPL1,ACP1,ATP1B1,XCL1,TREM2,FOXP4,USP25,SSC-LET-7C,MAP3K1,GPBP1,ENG,ST6GALNAC6,ST6GALNAC2,PIP5KL1,DPM2,PTGES2,CIZ1,SWI5,URM1,GLE1,PKN3,ZDHHC12,ENDOG,RNF6,CDK8,USP12,DKK1,…
GO:BP	protein metabolic process	GO:0019538	2.46898e-12	11.6075	4886	369	110	35670	SPDYA,HNRNPU,GALNT10,CAMKMT,PREPL,PPM1B,LRPPRC,PGB,CDK12,FBXL20,RPL19,NPEPPS,TBX21,OSBPL7,MRPL10,SCRN2,CDK5RAP3,RAP2B,PREP,HMGB1,USPL1,ACP1,TREM2,USP25,MAP3K1,ENG,ST6GALNAC6,ST6GALNAC2,PIP5KL1,DPM2,URM1,GLE1,PKN3,ZDHHC12,RNF6,CDK8,USP12,DKK1,PRKG1,MMS19,LOXL4,PRDM6,CSNK1G3,SIRT1,HERC4,STOX1,EIF3E,PSMB8,PSMB9,BRD2,RING1,BMP5,PSMA4,IREB2,OVCH2,SKP2,ISL1,MMP13,DCUN1D5,PDGFD,EXT2,BID,CLOCK,TMEM165,PP…
GO:BP	regulation of macromolecule metabolic process	GO:0060255	1.04768e-10	9.97977	5342	371	113	35670	SPDYA,HNRNPU,HAND1,SAP30L,PPM1B,LRPPRC,ADORA3,WDR77,CHIA,LRIF1,CDK12,MED1,FBXL20,TBX21,OSBPL7,SP6,NFE2L1,CDK5RAP3,SP2,SKAP1,MBNL1,RAP2B,LIN28B,HMGB1,ATP1B1,XCL1,TREM2,FOXP4,USP25,SSC-LET-7C,GPBP1,ENG,PIP5KL1,PTGES2,CIZ1,GLE1,ENDOG,RNF6,DKK1,MMS19,ANKRD2,SFRP5,PRDM6,SIRT1,ATOH7,HNRNPH3,CCAR1,STOX1,DDX21,EIF3E,PSMB8,PSMB9,BRD2,RING1,SSC-MIR-219A,RXRB,BMP5,SSC-MIR-206,SSC-MIR-133B,IL17A,IREB2,ZNF215…
GO:BP	response to stimulus	GO:0050896	1.09709e-10	9.95976	8161	371	150	35670	SPDYA,HNRNPU,PPM1B,RAP1A,ADORA3,CHIA,MED1,FBXL20,NPEPPS,KPNB1,TBX21,OSBPL7,NFE2L1,CDK5RAP3,SKAP1,P2RY1,RAP2B,HMGB1,ALOX5AP,ATP1B1,XCL1,TREML1,TREM2,TREM-1,CDC42EP4,SSTR2,USP25,MAP3K1,ENG,SLC25A25,LCN2,SWI5,PKN3,ENDOG,ATP8A2,RNF6,DKK1,PRKG1,SLIT1,MMS19,MORN4,AVPI1,ZFYVE27,SFRP5,CSNK1G3,FLRT2,SIRT1,HERC4,ATOH7,PBLD,STOX1,DDX21,RSPO2,SLA-DOB,TAP2,TAP1,SLA-DMB,SLA-DMA,RXRB,BMP5,GFRAL,IL17A,MCM3,CHRNA…
GO:BP	regulation of metabolic process	GO:0019222	2.74242e-10	9.56187	5743	322	106	35670	SPDYA,HNRNPU,HAND1,SAP30L,PPM1B,LRPPRC,ADORA3,WDR77,CHIA,DRAM2,LRIF1,CDK12,MED1,FBXL20,TBX21,OSBPL7,SP6,NFE2L1,CDK5RAP3,SP2,SKAP1,MBNL1,RAP2B,LIN28B,HMGB1,ATP1B1,XCL1,TREM2,FOXP4,USP25,SSC-LET-7C,GPBP1,ENG,PIP5KL1,PTGES2,CIZ1,GLE1,ENDOG,RNF6,DKK1,MMS19,ANKRD2,SFRP5,PRDM6,SIRT1,ATOH7,HNRNPH3,CCAR1,STOX1,DDX21,EIF3E,PSMB8,PSMB9,BRD2,RING1,SSC-MIR-219A,RXRB,BMP5,SSC-MIR-206,SSC-MIR-133B,IL17A,IREB2,…
GO:BP	biosynthetic process	GO:0009058	3.55138e-10	9.4496	5006	371	107	35670	HNRNPU,HAND1,SAP30L,GALNT10,LRPPRC,ADORA3,WDR77,CEPT1,LRIF1,CDK12,MED1,RPL19,TBX21,MRPL10,SP6,PNPO,NFE2L1,CDK5RAP3,SP2,SKAP1,HMGB1,USPL1,ALOX5AP,NME7,FOXP4,GPBP1,FPGS,ENG,AK1,ST6GALNAC6,ST6GALNAC2,PIP5KL1,DPM2,PTGES2,GLE1,ZDHHC12,RNF6,DKK1,MMS19,ANKRD2,HOGA1,SFRP5,PRDM6,SIRT1,ATOH7,PBLD,CCAR1,STOX1,DDX21,EIF3E,BRD2,RING1,HSD17B8,RXRB,BMP5,HMGCLL1,IL17A,IREB2,ZNF215,NADK2,ISL1,PTGES3,PRIM1,STAT6,Z…
GO:BP	positive regulation of biological process	GO:0048518	9.42343e-10	9.02579	4924	372	105	35670	SPDYA,PLB1,HNRNPU,HAND1,PPM1B,RAP1A,WDR77,CHIA,CD53,CDK12,MED1,STAC2,TBX21,OSBPL7,CDK5RAP3,SKAP1,P2RY1,RAP2B,LIN28B,HMGB1,MEDAG,ATP1B1,XCL1,TREM2,CDC42EP4,GPBP1,ENG,PIP5KL1,PTGES2,CIZ1,ZDHHC12,ENDOG,ATP8A2,RNF6,WASF3,DKK1,MMS19,AVPI1,ZFYVE27,CEP120,CSNK1G3,FLRT2,SIRT1,ATOH7,CCAR1,STOX1,DDX21,EIF3E,RSPO2,SLA-DOB,TAP2,SLA-DMB,SLA-DMA,RXRB,BMP5,GFRAL,IL17A,SYT9,IL7R,SKP2,RANBP3L,ISL1,PTGES3,STAT6,ST…
GO:BP	positive regulation of cellular process	GO:0048522	1.00879e-09	8.9962	4306	377	97	35670	SPDYA,HNRNPU,HAND1,PPM1B,RAP1A,WDR77,CD53,CDK12,MED1,STAC2,TBX21,CDK5RAP3,SKAP1,RAP2B,LIN28B,HMGB1,MEDAG,ATP1B1,XCL1,TREM2,CDC42EP4,GPBP1,ENG,PIP5KL1,PTGES2,CIZ1,ZDHHC12,ENDOG,ATP8A2,RNF6,WASF3,DKK1,MMS19,AVPI1,ZFYVE27,CEP120,CSNK1G3,FLRT2,SIRT1,ATOH7,CCAR1,STOX1,DDX21,EIF3E,RSPO2,SLA-DOB,TAP2,SLA-DMB,SLA-DMA,RXRB,BMP5,GFRAL,IL17A,SYT9,IL7R,SKP2,RANBP3L,ISL1,PTGES3,STAT6,STAC3,PDGFD,MEF2C,BID,CLO…
GO:BP	macromolecule modification	GO:0043412	1.45158e-09	8.83816	3278	329	74	35670	TRMT61B,SPDYA,GALNT10,CAMKMT,PPM1B,CDK12,CDK5RAP3,RAP2B,HMGB1,USPL1,ACP1,TREM2,USP25,MAP3K1,ENG,ST6GALNAC6,ST6GALNAC2,PIP5KL1,DPM2,URM1,PKN3,ZDHHC12,RNF6,CDK8,USP12,DKK1,PRKG1,LOXL4,PRDM6,CSNK1G3,SIRT1,HERC4,STOX1,BRD2,RING1,BMP5,SKP2,ISL1,DCUN1D5,PDGFD,EXT2,CLOCK,TMEM165,PP2D1,KAT2B,ITGA1,FBLL1,MBD2,DCUN1D3,THUMPD1,UMOD,GPRC5B,CRY1,CDKAL1,GCSH,FBXO9,CWH43,DCUN1D4,USP46,MORC3,HLCS,PIGP,TTC3,TTK,T…
GO:BP	cellular metabolic process	GO:0044237	2.08884e-09	8.6801	9603	371	164	35670	TRMT61B,PPP1CB,SPDYA,HNRNPU,HAND1,SAP30L,PPM1B,SNORA25,LRPPRC,ADORA3,WDR77,CEPT1,DRAM2,LRIF1,CDK12,MED1,RPL19,NPEPPS,TBX21,MRPL10,SP6,PNPO,NFE2L1,CDK5RAP3,SP2,SKAP1,MBNL1,RAP2B,LIN28B,HMGB1,USPL1,ALOX5AP,ACP1,NME7,ATP1B1,TREM2,FOXP4,MAP3K1,GPBP1,FPGS,ENG,AK1,ST6GALNAC6,PIP5KL1,DPM2,SLC25A25,PTGES2,CIZ1,SWI5,URM1,GLE1,PKN3,ENDOG,RNF6,CDK8,DKK1,PRKG1,EXOSC1,MMS19,ANKRD2,HOGA1,SFRP5,PRDM6,CSNK1G3,SI…
GO:BP	organic substance biosynthetic process	GO:1901576	2.66022e-09	8.57508	4948	371	104	35670	HNRNPU,HAND1,SAP30L,GALNT10,LRPPRC,ADORA3,WDR77,CEPT1,LRIF1,CDK12,MED1,RPL19,TBX21,MRPL10,SP6,PNPO,NFE2L1,CDK5RAP3,SP2,SKAP1,HMGB1,USPL1,ALOX5AP,NME7,FOXP4,GPBP1,FPGS,ENG,AK1,ST6GALNAC6,ST6GALNAC2,PIP5KL1,DPM2,PTGES2,GLE1,ZDHHC12,RNF6,DKK1,MMS19,ANKRD2,HOGA1,SFRP5,PRDM6,SIRT1,ATOH7,CCAR1,STOX1,DDX21,EIF3E,BRD2,RING1,HSD17B8,RXRB,BMP5,HMGCLL1,IL17A,IREB2,ZNF215,NADK2,ISL1,PTGES3,PRIM1,STAT6,ZBTB39…
GO:BP	protein modification process	GO:0036211	2.74658e-09	8.56121	3106	329	71	35670	SPDYA,GALNT10,CAMKMT,PPM1B,CDK12,CDK5RAP3,RAP2B,HMGB1,USPL1,ACP1,TREM2,USP25,MAP3K1,ENG,ST6GALNAC6,ST6GALNAC2,PIP5KL1,DPM2,URM1,PKN3,ZDHHC12,RNF6,CDK8,USP12,DKK1,PRKG1,LOXL4,PRDM6,CSNK1G3,SIRT1,HERC4,STOX1,BRD2,RING1,BMP5,SKP2,ISL1,DCUN1D5,PDGFD,EXT2,CLOCK,TMEM165,PP2D1,KAT2B,ITGA1,FBLL1,MBD2,DCUN1D3,UMOD,GPRC5B,CRY1,GCSH,FBXO9,CWH43,DCUN1D4,USP46,MORC3,HLCS,PIGP,TTC3,TTK,TRMT112,FKBP2,VEGFB,TRPT…
GO:BP	cellular biosynthetic process	GO:0044249	9.93287e-09	8.00293	4624	371	98	35670	HNRNPU,HAND1,SAP30L,LRPPRC,ADORA3,WDR77,CEPT1,LRIF1,CDK12,MED1,RPL19,TBX21,MRPL10,SP6,PNPO,NFE2L1,CDK5RAP3,SP2,SKAP1,HMGB1,USPL1,ALOX5AP,NME7,FOXP4,GPBP1,FPGS,ENG,AK1,ST6GALNAC6,PIP5KL1,DPM2,PTGES2,GLE1,RNF6,DKK1,MMS19,ANKRD2,HOGA1,SFRP5,PRDM6,SIRT1,ATOH7,CCAR1,STOX1,DDX21,EIF3E,BRD2,RING1,HSD17B8,RXRB,BMP5,HMGCLL1,IL17A,IREB2,ZNF215,NADK2,ISL1,PTGES3,PRIM1,STAT6,ZBTB39,EXT2,MEF2C,CLOCK,POLR2B,KA…
GO:BP	cellular response to stimulus	GO:0051716	1.2373e-07	6.90753	7104	371	128	35670	SPDYA,HNRNPU,PPM1B,RAP1A,ADORA3,MED1,NPEPPS,KPNB1,TBX21,OSBPL7,NFE2L1,CDK5RAP3,SKAP1,P2RY1,RAP2B,HMGB1,ALOX5AP,ATP1B1,XCL1,TREM2,CDC42EP4,SSTR2,USP25,MAP3K1,ENG,SWI5,PKN3,ENDOG,RNF6,DKK1,PRKG1,MMS19,AVPI1,ZFYVE27,SFRP5,CSNK1G3,FLRT2,SIRT1,HERC4,PBLD,STOX1,DDX21,RSPO2,RXRB,BMP5,GFRAL,IL17A,MCM3,CHRNA5,CHRNA3,OLFML1,SYT9,OR10A4,NRG3,IL7R,LMBRD2,SKP2,ISL1,PTGES3,STAT6,TAC3,GPR182,NMUR2,GLRA1,DCUN1D5…
GO:BP	phosphate-containing compound metabolic process	GO:0006796	1.35035e-07	6.86955	2356	323	56	35670	SPDYA,HNRNPU,PPM1B,CEPT1,CDK12,PNPO,CDK5RAP3,SKAP1,RAP2B,HMGB1,ACP1,NME7,ATP1B1,TREM2,MAP3K1,ENG,AK1,PIP5KL1,DPM2,SLC25A25,PKN3,CDK8,DKK1,PRKG1,CSNK1G3,SIRT1,STOX1,BRD2,BMP5,SKP2,NADK2,ISL1,PTGES3,PDGFD,PP2D1,KAT2B,PARG,ALOX5,ITGA1,MOCS2,PANK3,ACSM3,ACSM4,ACSM5,UMOD,GPRC5B,CWH43,MORC3,PIGP,TTK,BAD,PLCB3,PPP1R14B,VEGFB,TRPT1,MARK2
GO:BP	regulation of gene expression	GO:0010468	1.62923e-07	6.78802	4179	282	73	35670	HNRNPU,HAND1,SAP30L,PPM1B,LRPPRC,ADORA3,WDR77,CHIA,LRIF1,CDK12,MED1,TBX21,SP6,NFE2L1,CDK5RAP3,SP2,SKAP1,MBNL1,LIN28B,HMGB1,ATP1B1,XCL1,TREM2,FOXP4,SSC-LET-7C,GPBP1,ENG,PTGES2,GLE1,RNF6,DKK1,MMS19,ANKRD2,SFRP5,PRDM6,SIRT1,ATOH7,HNRNPH3,CCAR1,STOX1,DDX21,EIF3E,BRD2,RING1,SSC-MIR-219A,RXRB,BMP5,SSC-MIR-206,SSC-MIR-133B,IL17A,IREB2,ZNF215,IL7R,ISL1,STAT6,ZBTB39,SSC-MIR-708,MEF2C,IL17RA,CLOCK,KAT2B,NC…
GO:BP	small molecule metabolic process	GO:0044281	1.70688e-07	6.7678	1426	370	45	35670	CEPT1,PNPO,NFE2L1,ALOX5AP,NME7,ATP1B1,FPGS,AK1,DPM2,SLC25A25,PTGES2,HOGA1,SIRT1,HSD17B8,BMP5,HMGCLL1,IREB2,NADK2,PTGES3,HSD17B6,SDR9C7,ACCS,KAT2B,PARG,ALOX5,PANK3,ACSM3,ACSM4,ACSM5,CRY1,GCSH,BCKDHB,SLC22A12,SLC22A11,BAD,MACROD1,FADS2,FADS3,FADS1,DAGLA,DDB1,ADH7,ADH4,ADH5,APOF
GO:BP	regulation of nitrogen compound metabolic process	GO:0051171	1.81496e-07	6.74113	4665	322	86	35670	SPDYA,HNRNPU,HAND1,SAP30L,LRPPRC,ADORA3,WDR77,LRIF1,CDK12,MED1,FBXL20,TBX21,OSBPL7,SP6,NFE2L1,CDK5RAP3,SP2,SKAP1,MBNL1,RAP2B,LIN28B,HMGB1,TREM2,FOXP4,USP25,GPBP1,ENG,PIP5KL1,PTGES2,CIZ1,GLE1,ENDOG,RNF6,DKK1,MMS19,ANKRD2,SFRP5,PRDM6,SIRT1,ATOH7,HNRNPH3,CCAR1,STOX1,DDX21,EIF3E,PSMB8,PSMB9,BRD2,RING1,RXRB,BMP5,IL17A,IREB2,ZNF215,SKP2,ISL1,PTGES3,STAT6,ZBTB39,DCUN1D5,PDGFD,MEF2C,BID,CLOCK,KAT2B,PARG,…
GO:BP	phosphorus metabolic process	GO:0006793	1.98715e-07	6.70177	2380	323	56	35670	SPDYA,HNRNPU,PPM1B,CEPT1,CDK12,PNPO,CDK5RAP3,SKAP1,RAP2B,HMGB1,ACP1,NME7,ATP1B1,TREM2,MAP3K1,ENG,AK1,PIP5KL1,DPM2,SLC25A25,PKN3,CDK8,DKK1,PRKG1,CSNK1G3,SIRT1,STOX1,BRD2,BMP5,SKP2,NADK2,ISL1,PTGES3,PDGFD,PP2D1,KAT2B,PARG,ALOX5,ITGA1,MOCS2,PANK3,ACSM3,ACSM4,ACSM5,UMOD,GPRC5B,CWH43,MORC3,PIGP,TTK,BAD,PLCB3,PPP1R14B,VEGFB,TRPT1,MARK2
GO:BP	multicellular organismal process	GO:0032501	2.8635e-07	6.5431	6480	355	115	35670	SPDYA,HNRNPU,HAND1,PPM1B,RAP1A,WDR77,CHIA,DRAM2,MED1,FBXL20,STAC2,PLXDC1,TBX21,CDK5RAP3,SP2,P2RY1,RAP2B,POPDC3,KATNAL1,ALOX5AP,ATP1B1,XCL1,TSPO2,TREML1,TREM2,ENG,SLC25A25,PKN3,ZDHHC12,ENDOG,ATP8A2,WASF3,KLHL1,DKK1,PRKG1,SLIT1,MARVELD1,ZFYVE27,SFRP5,PRDM6,CEP120,FLRT2,SIRT1,HERC4,ATOH7,PBLD,STOX1,DDX21,RSPO2,SLA-DOB,SLA-DMB,SLA-DMA,BRD2,SLC39A7,COL11A2,BMP5,GFRAL,IL17A,CHRNA5,CHRNA3,IREB2,OR10A4,N…
GO:BP	heterocycle biosynthetic process	GO:0018130	3.60839e-07	6.44269	3374	282	63	35670	HNRNPU,HAND1,SAP30L,ADORA3,WDR77,CEPT1,LRIF1,CDK12,MED1,TBX21,SP6,PNPO,NFE2L1,CDK5RAP3,SP2,SKAP1,HMGB1,USPL1,NME7,FOXP4,GPBP1,FPGS,ENG,AK1,PTGES2,RNF6,DKK1,MMS19,ANKRD2,SFRP5,PRDM6,SIRT1,ATOH7,CCAR1,STOX1,DDX21,BRD2,RING1,RXRB,BMP5,IL17A,IREB2,ZNF215,NADK2,ISL1,PTGES3,PRIM1,STAT6,ZBTB39,MEF2C,CLOCK,POLR2B,KAT2B,NCOA4,ALOX5,MOCS2,PANK3,MBD2,CRY1,MTERF2,RFX4,E2F3,GCM1
GO:BP	organic cyclic compound biosynthetic process	GO:1901362	4.19403e-07	6.37737	3472	282	64	35670	HNRNPU,HAND1,SAP30L,ADORA3,WDR77,CEPT1,LRIF1,CDK12,MED1,TBX21,SP6,PNPO,NFE2L1,CDK5RAP3,SP2,SKAP1,HMGB1,USPL1,NME7,FOXP4,GPBP1,FPGS,ENG,AK1,PTGES2,RNF6,DKK1,MMS19,ANKRD2,SFRP5,PRDM6,SIRT1,ATOH7,CCAR1,STOX1,DDX21,BRD2,RING1,HSD17B8,RXRB,BMP5,IL17A,IREB2,ZNF215,NADK2,ISL1,PTGES3,PRIM1,STAT6,ZBTB39,MEF2C,CLOCK,POLR2B,KAT2B,NCOA4,ALOX5,MOCS2,PANK3,MBD2,CRY1,MTERF2,RFX4,E2F3,GCM1
GO:BP	regulation of primary metabolic process	GO:0080090	7.28946e-07	6.1373	4793	322	86	35670	SPDYA,HNRNPU,HAND1,SAP30L,LRPPRC,ADORA3,WDR77,LRIF1,CDK12,MED1,FBXL20,TBX21,OSBPL7,SP6,NFE2L1,CDK5RAP3,SP2,SKAP1,MBNL1,RAP2B,LIN28B,HMGB1,TREM2,FOXP4,USP25,GPBP1,ENG,PIP5KL1,PTGES2,CIZ1,GLE1,ENDOG,RNF6,DKK1,MMS19,ANKRD2,SFRP5,PRDM6,SIRT1,ATOH7,HNRNPH3,CCAR1,STOX1,DDX21,EIF3E,PSMB8,PSMB9,BRD2,RING1,RXRB,BMP5,IL17A,IREB2,ZNF215,SKP2,ISL1,PTGES3,STAT6,ZBTB39,DCUN1D5,PDGFD,MEF2C,BID,CLOCK,KAT2B,PARG,…
GO:BP	aromatic compound biosynthetic process	GO:0019438	1.0611e-06	5.97424	3378	282	62	35670	HNRNPU,HAND1,SAP30L,ADORA3,WDR77,CEPT1,LRIF1,CDK12,MED1,TBX21,SP6,PNPO,NFE2L1,CDK5RAP3,SP2,SKAP1,HMGB1,USPL1,NME7,FOXP4,GPBP1,FPGS,ENG,AK1,PTGES2,RNF6,DKK1,MMS19,ANKRD2,SFRP5,PRDM6,SIRT1,ATOH7,CCAR1,STOX1,DDX21,BRD2,RING1,RXRB,BMP5,IL17A,IREB2,ZNF215,NADK2,ISL1,PTGES3,PRIM1,STAT6,ZBTB39,MEF2C,CLOCK,POLR2B,KAT2B,NCOA4,ALOX5,PANK3,MBD2,CRY1,MTERF2,RFX4,E2F3,GCM1
GO:BP	regulation of cellular metabolic process	GO:0031323	1.29326e-06	5.88831	4452	371	90	35670	SPDYA,HNRNPU,HAND1,SAP30L,LRPPRC,ADORA3,WDR77,DRAM2,LRIF1,CDK12,MED1,TBX21,SP6,NFE2L1,CDK5RAP3,SP2,SKAP1,MBNL1,RAP2B,LIN28B,HMGB1,TREM2,FOXP4,GPBP1,ENG,PIP5KL1,PTGES2,CIZ1,GLE1,ENDOG,RNF6,DKK1,MMS19,ANKRD2,SFRP5,PRDM6,SIRT1,ATOH7,HNRNPH3,CCAR1,STOX1,DDX21,EIF3E,BRD2,RING1,RXRB,BMP5,IL17A,IREB2,ZNF215,ISL1,PTGES3,STAT6,ZBTB39,PDGFD,MEF2C,CLOCK,KAT2B,PARG,NCOA4,ALOX5,ITGA1,MBD2,GPRC5B,CRY1,MTERF2,R…
GO:BP	developmental process	GO:0032502	2.79665e-06	5.55336	4699	294	78	35670	HNRNPU,HAND1,RAP1A,WDR77,CD53,CDK12,MED1,PLXDC1,TBX21,SP6,CDK5RAP3,SP2,P2RY1,POPDC3,KATNAL1,MEDAG,TSPO2,TREM2,CDC42EP4,ENG,SLC25A25,ZDHHC12,ENDOG,ATP8A2,WASF3,KLHL1,DKK1,PRKG1,SLIT1,MARVELD1,ZFYVE27,SFRP5,PRDM6,CEP120,FLRT2,SIRT1,HERC4,MYPN,ATOH7,HNRNPH3,STOX1,RSPO2,PSMB8,BRD2,SLC39A7,COL11A2,BMP5,GFRAL,IL17A,CHRNA3,IREB2,OR10A4,NRG3,SPEF2,IL7R,RANBP3L,ISL1,PTGES3,STAT6,NMUR2,MMP13,MEF2C,CECR2,CL…
GO:BP	positive regulation of nitrogen compound metabolic process	GO:0051173	4.3461e-06	5.3619	2513	377	61	35670	SPDYA,HNRNPU,HAND1,WDR77,CDK12,MED1,TBX21,OSBPL7,CDK5RAP3,SKAP1,RAP2B,LIN28B,HMGB1,TREM2,GPBP1,ENG,PTGES2,CIZ1,ENDOG,RNF6,DKK1,MMS19,SIRT1,ATOH7,CCAR1,STOX1,DDX21,EIF3E,RXRB,BMP5,IL17A,SKP2,ISL1,PTGES3,STAT6,DCUN1D5,PDGFD,MEF2C,BID,CLOCK,KAT2B,NCOA4,ITGA1,DCUN1D3,GPRC5B,CRY1,RFX4,E2F3,GCM1,DCUN1D4,TRMT112,BAD,VEGFB,DDB1,CNTF,BTBD18,MED19,PAN2,STAT2,TIMELESS,RDX
GO:BP	cellular nitrogen compound biosynthetic process	GO:0044271	4.56373e-06	5.34068	4135	203	55	35670	HNRNPU,HAND1,SAP30L,LRPPRC,ADORA3,WDR77,CEPT1,LRIF1,CDK12,MED1,RPL19,TBX21,MRPL10,SP6,PNPO,NFE2L1,CDK5RAP3,SP2,SKAP1,HMGB1,USPL1,NME7,FOXP4,GPBP1,FPGS,ENG,AK1,ST6GALNAC6,PTGES2,GLE1,RNF6,DKK1,MMS19,ANKRD2,SFRP5,PRDM6,SIRT1,ATOH7,CCAR1,STOX1,DDX21,EIF3E,BRD2,RING1,RXRB,BMP5,IL17A,IREB2,ZNF215,NADK2,ISL1,PTGES3,PRIM1,STAT6,ZBTB39
GO:BP	positive regulation of macromolecule metabolic process	GO:0010604	6.78957e-06	5.16816	2821	285	54	35670	SPDYA,HNRNPU,HAND1,WDR77,CHIA,CDK12,MED1,TBX21,OSBPL7,CDK5RAP3,SKAP1,RAP2B,LIN28B,HMGB1,XCL1,TREM2,GPBP1,ENG,PTGES2,CIZ1,ENDOG,RNF6,DKK1,MMS19,SIRT1,ATOH7,CCAR1,STOX1,DDX21,EIF3E,RXRB,BMP5,IL17A,IL7R,SKP2,ISL1,PTGES3,STAT6,DCUN1D5,PDGFD,MEF2C,IL17RA,BID,CLOCK,KAT2B,NCOA4,ITGA1,DCUN1D3,GPRC5B,CRY1,RFX4,E2F3,GCM1,DCUN1D4
GO:BP	macromolecule biosynthetic process	GO:0009059	8.13921e-06	5.08942	4119	304	72	35670	HNRNPU,HAND1,SAP30L,GALNT10,LRPPRC,ADORA3,WDR77,LRIF1,CDK12,MED1,RPL19,TBX21,MRPL10,SP6,NFE2L1,CDK5RAP3,SP2,SKAP1,HMGB1,USPL1,FOXP4,GPBP1,ENG,ST6GALNAC6,ST6GALNAC2,DPM2,PTGES2,GLE1,ZDHHC12,RNF6,DKK1,MMS19,ANKRD2,SFRP5,PRDM6,SIRT1,ATOH7,CCAR1,STOX1,DDX21,EIF3E,BRD2,RING1,RXRB,BMP5,IL17A,IREB2,ZNF215,ISL1,PTGES3,PRIM1,STAT6,ZBTB39,EXT2,MEF2C,CLOCK,TMEM165,POLR2B,KAT2B,NCOA4,MBD2,CRY1,MTERF2,RFX4,E2…
GO:BP	nucleobase-containing compound biosynthetic process	GO:0034654	9.17061e-06	5.0376	3305	282	59	35670	HNRNPU,HAND1,SAP30L,ADORA3,WDR77,CEPT1,LRIF1,CDK12,MED1,TBX21,SP6,NFE2L1,CDK5RAP3,SP2,SKAP1,HMGB1,USPL1,NME7,FOXP4,GPBP1,ENG,AK1,PTGES2,RNF6,DKK1,MMS19,ANKRD2,SFRP5,PRDM6,SIRT1,ATOH7,CCAR1,STOX1,DDX21,BRD2,RING1,RXRB,BMP5,IL17A,ZNF215,NADK2,ISL1,PTGES3,PRIM1,STAT6,ZBTB39,MEF2C,CLOCK,POLR2B,KAT2B,NCOA4,ALOX5,PANK3,MBD2,CRY1,MTERF2,RFX4,E2F3,GCM1
GO:BP	multicellular organism development	GO:0007275	1.12337e-05	4.94948	3393	325	66	35670	HNRNPU,HAND1,RAP1A,WDR77,MED1,PLXDC1,TBX21,CDK5RAP3,POPDC3,TREM2,ENG,SLC25A25,ZDHHC12,ENDOG,ATP8A2,WASF3,KLHL1,DKK1,PRKG1,SLIT1,MARVELD1,ZFYVE27,SFRP5,PRDM6,CEP120,FLRT2,SIRT1,ATOH7,STOX1,RSPO2,BRD2,COL11A2,BMP5,GFRAL,IL17A,CHRNA3,IREB2,OR10A4,NRG3,IL7R,RANBP3L,ISL1,PTGES3,STAT6,NMUR2,MMP13,MEF2C,CECR2,CLOCK,ALOX5,PELO,ITGA2,SLIT3,FBLL1,TENM2,UMOD,RFX4,GCM1,SGCB,MORC3,SIM2,GPR137,BAD,VEGFB,MARK2,…
GO:BP	negative regulation of biological process	GO:0048519	1.5678e-05	4.80471	4384	371	86	35670	HNRNPU,HAND1,PPM1B,LRPPRC,RAP1A,ADORA3,WDR77,CDK12,MED1,TBX21,CDK5RAP3,SP2,RAP2B,LIN28B,DPT,XCL1,TREM2,FOXP4,USP25,SSC-LET-7C,ENG,PIP5KL1,SPTAN1,ENDOG,DKK1,PRKG1,SFRP5,PRDM6,SIRT1,HERC4,PBLD,CCAR1,STOX1,EIF3E,RSPO2,SLA-DOB,RING1,SSC-MIR-219A,BMP5,SSC-MIR-206,SSC-MIR-133B,IREB2,NRG3,IL7R,RANBP3L,ISL1,STAT6,ZBTB39,GLRA1,SSC-MIR-708,MEF2C,BID,CLOCK,KAT2B,ALOX5,ITGA1,PELO,SLIT3,SSC-MIR-218B,SSC-MIR-1…
GO:BP	localization	GO:0051179	1.62243e-05	4.78983	4401	246	64	35670	HNRNPU,PREPL,RAP1A,KCNA3,MED1,FBXL20,STAC2,KPNB1,OSBPL7,CDK5RAP3,SKAP1,SNX11,P2RY1,BLZF1,ATP1B1,XCL1,TSPO2,TREM2,COG1,SLC39A11,SLC25A25,PTGES2,LCN2,CIZ1,DNM1,ODF2,GLE1,WDR34,ZDHHC12,TBC1D13,ATP8A2,DKK1,SLIT1,ZFYVE27,LOXL4,CEP120,CSNK1G3,SIRT1,SLC25A16,EMC2,TAP2,TAP1,SLC39A7,CHRNA5,CHRNA3,IREB2,SYT9,RANBP3L,NACA,STAC3,NMUR2,GLRA1,SLC16A7,ARMC1,IPO8,ATP6V1E1,BID,MICAL3,CLOCK,TMEM165,EFHB,KAT2B,NCOA…
GO:BP	response to steroid hormone	GO:0048545	2.22988e-05	4.65172	150	363	13	35670	HNRNPU,MED1,SSTR2,RNF6,SIRT1,RXRB,SKP2,PTGES3,CLOCK,SLIT3,CRY1,ESRRA,EIF4E
GO:BP	cellular response to chemical stimulus	GO:0070887	2.66439e-05	4.5744	1975	371	50	35670	HNRNPU,RAP1A,MED1,NPEPPS,TBX21,OSBPL7,NFE2L1,CDK5RAP3,P2RY1,ALOX5AP,XCL1,TREM2,CDC42EP4,SSTR2,RNF6,SIRT1,STOX1,RXRB,IL17A,SYT9,IL7R,SKP2,PTGES3,STAT6,GLRA1,PDGFD,MEF2C,IL17RA,CLOCK,KAT2B,ALOX5,ITGA1,SLIT3,UMOD,CRY1,GSTA4,PRDX5,ESRRA,KCNK4,BAD,VEGFB,STIP1,SYT7,CNTF,ADH4,ADH5,EIF4E,RAP1GDS1,STAT2,TIMELESS
GO:BP	establishment of localization	GO:0051234	2.81113e-05	4.55112	3839	246	58	35670	HNRNPU,PREPL,RAP1A,KCNA3,MED1,FBXL20,STAC2,KPNB1,OSBPL7,SNX11,P2RY1,BLZF1,ATP1B1,XCL1,TSPO2,TREM2,COG1,SLC39A11,SLC25A25,PTGES2,DNM1,GLE1,WDR34,ZDHHC12,TBC1D13,ATP8A2,DKK1,SLIT1,ZFYVE27,LOXL4,CEP120,CSNK1G3,SIRT1,SLC25A16,EMC2,TAP2,TAP1,SLC39A7,CHRNA5,CHRNA3,IREB2,SYT9,RANBP3L,NACA,STAC3,NMUR2,GLRA1,SLC16A7,IPO8,ATP6V1E1,BID,MICAL3,CLOCK,TMEM165,EFHB,KAT2B,NCOA4,ALOX5
GO:BP	regulation of nucleobase-containing compound metabolic process	GO:0019219	3.09409e-05	4.50947	3307	305	61	35670	HNRNPU,HAND1,SAP30L,LRPPRC,ADORA3,WDR77,LRIF1,CDK12,MED1,TBX21,SP6,NFE2L1,CDK5RAP3,SP2,SKAP1,MBNL1,LIN28B,HMGB1,FOXP4,GPBP1,ENG,PTGES2,CIZ1,ENDOG,RNF6,DKK1,MMS19,ANKRD2,SFRP5,PRDM6,SIRT1,ATOH7,HNRNPH3,CCAR1,STOX1,DDX21,BRD2,RING1,RXRB,BMP5,IL17A,ZNF215,ISL1,PTGES3,STAT6,ZBTB39,MEF2C,CLOCK,KAT2B,PARG,NCOA4,MBD2,CRY1,MTERF2,RFX4,E2F3,GCM1,SIM2,PRDX5,ESRRA,TRMT112
GO:BP	regulation of biological quality	GO:0065008	3.15986e-05	4.50033	2138	377	53	35670	HNRNPU,PREPL,RAP1A,MED1,FBXL20,P2RY1,RAP2B,LIN28B,POPDC3,ATP1B1,TREML1,TREM2,CDC42EP4,PIP5KL1,DPM2,SPTAN1,ATP8A2,WASF3,PRKG1,ZFYVE27,FLRT2,SIRT1,STOX1,HSD17B8,BMP5,CHRNA5,CHRNA3,SYT9,IL7R,ISL1,PTGES3,HSD17B6,SDR9C7,NMUR2,GLRA1,BID,CLOCK,TMEM165,ALOX5,UMOD,CRY1,MORC3,KCNK4,BAD,PLCB3,FERMT3,DAGLA,DDB1,CTNND1,ADH7,ADH4,PAN2,RDX
GO:BP	antigen processing and presentation of exogenous peptide antigen	GO:0002478	3.30792e-05	4.48045	16	163	5	35670	SLA-DOB,TAP2,TAP1,SLA-DMB,SLA-DMA
GO:BP	system development	GO:0048731	3.50208e-05	4.45567	2827	372	63	35670	HNRNPU,HAND1,RAP1A,WDR77,MED1,PLXDC1,TBX21,CDK5RAP3,POPDC3,TREM2,ENG,SLC25A25,ZDHHC12,ATP8A2,WASF3,KLHL1,DKK1,PRKG1,SLIT1,MARVELD1,ZFYVE27,SFRP5,PRDM6,CEP120,FLRT2,SIRT1,ATOH7,RSPO2,BRD2,COL11A2,BMP5,GFRAL,CHRNA3,OR10A4,NRG3,IL7R,RANBP3L,ISL1,PTGES3,STAT6,NMUR2,MMP13,MEF2C,CECR2,CLOCK,ALOX5,SLIT3,TENM2,UMOD,RFX4,GCM1,SGCB,SIM2,BAD,VEGFB,MARK2,RTN3,DAGLA,CNTF,CLP1,EIF4E,TIMELESS,MIP
GO:BP	cellular response to steroid hormone stimulus	GO:0071383	3.5705e-05	4.44727	128	363	12	35670	HNRNPU,MED1,SSTR2,RNF6,SIRT1,RXRB,SKP2,PTGES3,CLOCK,CRY1,ESRRA,EIF4E
GO:BP	cell differentiation	GO:0030154	4.23984e-05	4.37265	3084	344	63	35670	HNRNPU,HAND1,RAP1A,WDR77,CD53,CDK12,MED1,TBX21,CDK5RAP3,POPDC3,MEDAG,TSPO2,TREM2,ENG,ATP8A2,WASF3,KLHL1,DKK1,PRKG1,SLIT1,ZFYVE27,SFRP5,PRDM6,CEP120,FLRT2,SIRT1,MYPN,ATOH7,HNRNPH3,RSPO2,PSMB8,SLC39A7,COL11A2,BMP5,IL17A,IREB2,OR10A4,NRG3,SPEF2,IL7R,RANBP3L,ISL1,STAT6,MEF2C,CECR2,CLOCK,ALOX5,PELO,ITGA2,SLIT3,TENM2,PDILT,FBXO9,GCM1,SGCB,SIM2,GPR137,BAD,MARK2,RTN3,DAGLA,DDB1,CNTF
GO:BP	anatomical structure development	GO:0048856	4.74578e-05	4.32369	4360	294	71	35670	HNRNPU,HAND1,RAP1A,WDR77,CD53,MED1,PLXDC1,TBX21,SP6,CDK5RAP3,P2RY1,POPDC3,TSPO2,TREM2,CDC42EP4,ENG,SLC25A25,ZDHHC12,ENDOG,ATP8A2,WASF3,KLHL1,DKK1,PRKG1,SLIT1,MARVELD1,ZFYVE27,SFRP5,PRDM6,CEP120,FLRT2,SIRT1,MYPN,ATOH7,HNRNPH3,STOX1,RSPO2,BRD2,SLC39A7,COL11A2,BMP5,GFRAL,IL17A,CHRNA3,IREB2,OR10A4,NRG3,SPEF2,IL7R,RANBP3L,ISL1,PTGES3,STAT6,NMUR2,MMP13,MEF2C,CECR2,CLOCK,ALOX5,PELO,ITGA2,SLIT3,FBLL1,TEN…
GO:BP	transport	GO:0006810	5.24886e-05	4.27994	3701	246	56	35670	HNRNPU,PREPL,RAP1A,KCNA3,MED1,FBXL20,STAC2,KPNB1,OSBPL7,SNX11,P2RY1,BLZF1,ATP1B1,XCL1,TSPO2,TREM2,COG1,SLC39A11,SLC25A25,PTGES2,DNM1,GLE1,WDR34,ZDHHC12,TBC1D13,ATP8A2,DKK1,SLIT1,ZFYVE27,LOXL4,CEP120,CSNK1G3,SIRT1,SLC25A16,TAP2,TAP1,SLC39A7,CHRNA5,CHRNA3,IREB2,SYT9,RANBP3L,NACA,STAC3,NMUR2,GLRA1,SLC16A7,IPO8,ATP6V1E1,BID,MICAL3,CLOCK,TMEM165,EFHB,NCOA4,ALOX5
GO:BP	fatty acid biosynthetic process	GO:0006633	5.66974e-05	4.24644	117	331	11	35670	PTGES2,SIRT1,HSD17B8,PTGES3,ALOX5,ACSM3,ACSM4,ACSM5,FADS2,FADS3,FADS1
GO:BP	cellular developmental process	GO:0048869	5.74195e-05	4.24094	3109	344	63	35670	HNRNPU,HAND1,RAP1A,WDR77,CD53,CDK12,MED1,TBX21,CDK5RAP3,POPDC3,MEDAG,TSPO2,TREM2,ENG,ATP8A2,WASF3,KLHL1,DKK1,PRKG1,SLIT1,ZFYVE27,SFRP5,PRDM6,CEP120,FLRT2,SIRT1,MYPN,ATOH7,HNRNPH3,RSPO2,PSMB8,SLC39A7,COL11A2,BMP5,IL17A,IREB2,OR10A4,NRG3,SPEF2,IL7R,RANBP3L,ISL1,STAT6,MEF2C,CECR2,CLOCK,ALOX5,PELO,ITGA2,SLIT3,TENM2,PDILT,FBXO9,GCM1,SGCB,SIM2,GPR137,BAD,MARK2,RTN3,DAGLA,DDB1,CNTF
GO:BP	organic cyclic compound metabolic process	GO:1901360	5.83175e-05	4.2342	6755	322	103	35670	TRMT61B,HNRNPU,HAND1,SAP30L,SNORA25,LRPPRC,ADORA3,WDR77,CEPT1,LRIF1,CDK12,MED1,TBX21,SP6,PNPO,NFE2L1,CDK5RAP3,SP2,SKAP1,MBNL1,LIN28B,HMGB1,USPL1,NME7,ATP1B1,FOXP4,GPBP1,FPGS,ENG,AK1,SLC25A25,PTGES2,CIZ1,SWI5,URM1,ENDOG,RNF6,DKK1,EXOSC1,MMS19,ANKRD2,HOGA1,SFRP5,PRDM6,SIRT1,ATOH7,HNRNPH3,CCAR1,STOX1,DDX21,EIF3E,BRD2,RING1,HSD17B8,RXRB,BMP5,IL17A,MCM3,IREB2,ZNF215,NADK2,ISL1,PTGES3,HSD17B6,PRIM1,STA…
GO:BP	positive regulation of metabolic process	GO:0009893	5.97053e-05	4.22399	3046	312	58	35670	SPDYA,HNRNPU,HAND1,WDR77,CHIA,CDK12,MED1,TBX21,OSBPL7,CDK5RAP3,SKAP1,RAP2B,LIN28B,HMGB1,XCL1,TREM2,GPBP1,ENG,PTGES2,CIZ1,ENDOG,RNF6,DKK1,MMS19,SIRT1,ATOH7,CCAR1,STOX1,DDX21,EIF3E,RXRB,BMP5,IL17A,IL7R,SKP2,ISL1,PTGES3,STAT6,DCUN1D5,PDGFD,MEF2C,IL17RA,BID,CLOCK,KAT2B,NCOA4,ITGA1,DCUN1D3,GPRC5B,CRY1,RFX4,E2F3,GCM1,DCUN1D4,MORC3,TRMT112,BAD,VEGFB
GO:BP	small molecule biosynthetic process	GO:0044283	8.49496e-05	4.07084	455	340	20	35670	CEPT1,PNPO,ALOX5AP,PTGES2,HOGA1,SIRT1,HSD17B8,BMP5,HMGCLL1,PTGES3,KAT2B,ALOX5,ACSM3,ACSM4,ACSM5,CRY1,FADS2,FADS3,FADS1,DDB1
GO:BP	antigen processing and presentation of peptide antigen	GO:0048002	8.54814e-05	4.06813	38	163	6	35670	TREM2,SLA-DOB,TAP2,TAP1,SLA-DMB,SLA-DMA
GO:BP	regulation of RNA metabolic process	GO:0051252	8.57207e-05	4.06691	3070	305	57	35670	HNRNPU,HAND1,SAP30L,LRPPRC,ADORA3,WDR77,LRIF1,CDK12,MED1,TBX21,SP6,NFE2L1,CDK5RAP3,SP2,SKAP1,MBNL1,LIN28B,HMGB1,FOXP4,GPBP1,ENG,PTGES2,RNF6,DKK1,MMS19,ANKRD2,SFRP5,PRDM6,SIRT1,ATOH7,HNRNPH3,CCAR1,STOX1,DDX21,BRD2,RING1,RXRB,BMP5,IL17A,ZNF215,ISL1,STAT6,ZBTB39,MEF2C,CLOCK,KAT2B,NCOA4,MBD2,CRY1,MTERF2,RFX4,E2F3,GCM1,SIM2,PRDX5,ESRRA,TRMT112
GO:BP	positive regulation of cellular metabolic process	GO:0031325	8.95194e-05	4.04808	2373	371	55	35670	SPDYA,HNRNPU,HAND1,WDR77,CDK12,MED1,TBX21,CDK5RAP3,SKAP1,RAP2B,LIN28B,HMGB1,TREM2,GPBP1,ENG,PTGES2,CIZ1,ENDOG,RNF6,DKK1,MMS19,SIRT1,ATOH7,CCAR1,STOX1,DDX21,EIF3E,RXRB,BMP5,IL17A,ISL1,PTGES3,STAT6,PDGFD,MEF2C,CLOCK,KAT2B,NCOA4,ITGA1,GPRC5B,CRY1,RFX4,E2F3,GCM1,MORC3,TRMT112,BAD,VEGFB,DDB1,CNTF,BTBD18,MED19,PAN2,STAT2,TIMELESS
GO:BP	cellular response to endogenous stimulus	GO:0071495	9.04191e-05	4.04374	1048	371	33	35670	HNRNPU,RAP1A,MED1,P2RY1,XCL1,SSTR2,ENG,RNF6,ZFYVE27,SFRP5,FLRT2,SIRT1,PBLD,RXRB,BMP5,SKP2,PTGES3,STAT6,GLRA1,PDGFD,MEF2C,CLOCK,KAT2B,PELO,SLIT3,CRY1,RASL11B,ESRRA,VEGFB,LPXN,EIF4E,RAP1GDS1,TIMELESS
GO:BP	monocarboxylic acid biosynthetic process	GO:0072330	0.000103827	3.98369	154	331	12	35670	PTGES2,HOGA1,SIRT1,HSD17B8,PTGES3,ALOX5,ACSM3,ACSM4,ACSM5,FADS2,FADS3,FADS1
GO:BP	signaling	GO:0023052	0.000109203	3.96177	6262	371	108	35670	PREPL,PPM1B,RAP1A,ADORA3,MED1,FBXL20,KPNB1,CDK5RAP3,SKAP1,P2RY1,RAP2B,HMGB1,ATP1B1,XCL1,TREM2,CDC42EP4,SSTR2,ENG,DNM1,PKN3,ZDHHC12,ENDOG,RNF6,DKK1,PRKG1,AVPI1,ZFYVE27,SFRP5,CSNK1G3,FLRT2,SIRT1,HERC4,PBLD,STOX1,DDX21,RSPO2,RXRB,BMP5,GFRAL,IL17A,CHRNA5,CHRNA3,OLFML1,SYT9,OR10A4,NRG3,IL7R,LMBRD2,SKP2,ISL1,PTGES3,STAT6,TAC3,GPR182,NMUR2,GLRA1,PDGFD,MEF2C,PDE7A,IL17RA,BID,NMU,CLOCK,IGFBP7,EFHB,ALOX5,I…
GO:BP	heterocycle metabolic process	GO:0046483	0.000110735	3.95572	6563	322	100	35670	TRMT61B,HNRNPU,HAND1,SAP30L,SNORA25,LRPPRC,ADORA3,WDR77,CEPT1,LRIF1,CDK12,MED1,TBX21,SP6,PNPO,NFE2L1,CDK5RAP3,SP2,SKAP1,MBNL1,LIN28B,HMGB1,USPL1,NME7,ATP1B1,FOXP4,GPBP1,FPGS,ENG,AK1,SLC25A25,PTGES2,CIZ1,SWI5,URM1,ENDOG,RNF6,DKK1,EXOSC1,MMS19,ANKRD2,HOGA1,SFRP5,PRDM6,SIRT1,ATOH7,HNRNPH3,CCAR1,STOX1,DDX21,EIF3E,BRD2,RING1,RXRB,BMP5,IL17A,MCM3,IREB2,ZNF215,NADK2,ISL1,PTGES3,PRIM1,STAT6,ZBTB39,MEF2C,…
GO:BP	regulation of macromolecule biosynthetic process	GO:0010556	0.000116919	3.93212	3189	203	44	35670	HNRNPU,HAND1,SAP30L,LRPPRC,ADORA3,WDR77,LRIF1,CDK12,MED1,TBX21,SP6,NFE2L1,CDK5RAP3,SP2,SKAP1,HMGB1,FOXP4,GPBP1,ENG,PTGES2,GLE1,RNF6,DKK1,MMS19,ANKRD2,SFRP5,PRDM6,SIRT1,ATOH7,CCAR1,STOX1,DDX21,EIF3E,BRD2,RING1,RXRB,BMP5,IL17A,IREB2,ZNF215,ISL1,PTGES3,STAT6,ZBTB39
GO:BP	phosphorylation	GO:0016310	0.00014125	3.85001	1556	323	38	35670	SPDYA,HNRNPU,CDK12,CDK5RAP3,SKAP1,RAP2B,HMGB1,NME7,TREM2,MAP3K1,ENG,AK1,PIP5KL1,PKN3,CDK8,DKK1,PRKG1,CSNK1G3,SIRT1,STOX1,BRD2,BMP5,SKP2,NADK2,ISL1,PTGES3,PDGFD,KAT2B,PANK3,UMOD,GPRC5B,MORC3,TTK,BAD,PPP1R14B,VEGFB,TRPT1,MARK2
GO:BP	RNA biosynthetic process	GO:0032774	0.000148634	3.82788	2966	304	55	35670	HNRNPU,HAND1,SAP30L,ADORA3,WDR77,LRIF1,CDK12,MED1,TBX21,SP6,NFE2L1,CDK5RAP3,SP2,SKAP1,HMGB1,USPL1,FOXP4,GPBP1,ENG,PTGES2,RNF6,DKK1,MMS19,ANKRD2,SFRP5,PRDM6,SIRT1,ATOH7,CCAR1,STOX1,DDX21,BRD2,RING1,RXRB,BMP5,IL17A,ZNF215,ISL1,PRIM1,STAT6,ZBTB39,MEF2C,CLOCK,POLR2B,KAT2B,NCOA4,MBD2,CRY1,MTERF2,RFX4,E2F3,GCM1,SIM2,PRDX5,ESRRA
GO:BP	response to endogenous stimulus	GO:0009719	0.000160443	3.79468	1129	371	34	35670	HNRNPU,RAP1A,MED1,P2RY1,XCL1,TREM2,SSTR2,ENG,RNF6,ZFYVE27,SFRP5,FLRT2,SIRT1,PBLD,RXRB,BMP5,SKP2,PTGES3,STAT6,GLRA1,PDGFD,MEF2C,CLOCK,KAT2B,PELO,SLIT3,CRY1,RASL11B,ESRRA,VEGFB,LPXN,EIF4E,RAP1GDS1,TIMELESS
GO:BP	antigen processing and presentation of exogenous antigen	GO:0019884	0.000195057	3.70984	22	163	5	35670	SLA-DOB,TAP2,TAP1,SLA-DMB,SLA-DMA
GO:BP	regulation of cellular biosynthetic process	GO:0031326	0.000235675	3.62769	3267	203	44	35670	HNRNPU,HAND1,SAP30L,LRPPRC,ADORA3,WDR77,LRIF1,CDK12,MED1,TBX21,SP6,NFE2L1,CDK5RAP3,SP2,SKAP1,HMGB1,FOXP4,GPBP1,ENG,PTGES2,GLE1,RNF6,DKK1,MMS19,ANKRD2,SFRP5,PRDM6,SIRT1,ATOH7,CCAR1,STOX1,DDX21,EIF3E,BRD2,RING1,RXRB,BMP5,IL17A,IREB2,ZNF215,ISL1,PTGES3,STAT6,ZBTB39
GO:BP	response to external stimulus	GO:0009605	0.000248729	3.60427	1935	312	42	35670	PPM1B,MED1,TBX21,HMGB1,XCL1,TREM2,TREM-1,CDC42EP4,MAP3K1,SLC25A25,LCN2,ATP8A2,PRKG1,SLIT1,FLRT2,SIRT1,ATOH7,DDX21,TAP2,IL17A,OR10A4,NRG3,IL7R,SKP2,ISL1,NMUR2,GLRA1,IL17RA,CLOCK,ALOX5,ITGA1,SLIT3,UMOD,CRY1,FBXO9,OCIAD2,USP46,BCKDHB,KCNK4,BAD,PPP1R14B,VEGFB
GO:BP	cell communication	GO:0007154	0.000254364	3.59455	6362	371	108	35670	PREPL,PPM1B,RAP1A,ADORA3,MED1,FBXL20,KPNB1,CDK5RAP3,SKAP1,P2RY1,RAP2B,HMGB1,ATP1B1,XCL1,TREM2,CDC42EP4,SSTR2,ENG,DNM1,PKN3,ZDHHC12,ENDOG,RNF6,DKK1,PRKG1,AVPI1,ZFYVE27,SFRP5,CSNK1G3,FLRT2,SIRT1,HERC4,PBLD,STOX1,DDX21,RSPO2,RXRB,BMP5,GFRAL,IL17A,CHRNA5,CHRNA3,OLFML1,SYT9,OR10A4,NRG3,IL7R,LMBRD2,SKP2,ISL1,PTGES3,STAT6,TAC3,GPR182,NMUR2,GLRA1,PDGFD,MEF2C,PDE7A,IL17RA,BID,NMU,CLOCK,IGFBP7,EFHB,ALOX5,I…
GO:BP	response to organic substance	GO:0010033	0.000280372	3.55227	1936	371	47	35670	HNRNPU,RAP1A,MED1,TBX21,OSBPL7,CDK5RAP3,P2RY1,ALOX5AP,XCL1,TREM2,CDC42EP4,SSTR2,USP25,ENDOG,RNF6,SIRT1,DDX21,TAP2,RXRB,IL17A,SYT9,IL7R,SKP2,PTGES3,STAT6,GLRA1,PDGFD,MEF2C,IL17RA,CLOCK,KAT2B,SLIT3,UMOD,CRY1,USP46,ESRRA,KCNK4,BAD,STIP1,SYT7,CNTF,ADH4,ADH5,EIF4E,RAP1GDS1,STAT2,TIMELESS
GO:BP	DNA-templated transcription	GO:0006351	0.000280653	3.55183	2941	304	54	35670	HNRNPU,HAND1,SAP30L,ADORA3,WDR77,LRIF1,CDK12,MED1,TBX21,SP6,NFE2L1,CDK5RAP3,SP2,SKAP1,HMGB1,USPL1,FOXP4,GPBP1,ENG,PTGES2,RNF6,DKK1,MMS19,ANKRD2,SFRP5,PRDM6,SIRT1,ATOH7,CCAR1,STOX1,DDX21,BRD2,RING1,RXRB,BMP5,IL17A,ZNF215,ISL1,STAT6,ZBTB39,MEF2C,CLOCK,POLR2B,KAT2B,NCOA4,MBD2,CRY1,MTERF2,RFX4,E2F3,GCM1,SIM2,PRDX5,ESRRA
GO:BP	nucleic acid-templated transcription	GO:0097659	0.000283787	3.54701	2942	304	54	35670	HNRNPU,HAND1,SAP30L,ADORA3,WDR77,LRIF1,CDK12,MED1,TBX21,SP6,NFE2L1,CDK5RAP3,SP2,SKAP1,HMGB1,USPL1,FOXP4,GPBP1,ENG,PTGES2,RNF6,DKK1,MMS19,ANKRD2,SFRP5,PRDM6,SIRT1,ATOH7,CCAR1,STOX1,DDX21,BRD2,RING1,RXRB,BMP5,IL17A,ZNF215,ISL1,STAT6,ZBTB39,MEF2C,CLOCK,POLR2B,KAT2B,NCOA4,MBD2,CRY1,MTERF2,RFX4,E2F3,GCM1,SIM2,PRDX5,ESRRA
GO:BP	antigen processing and presentation	GO:0019882	0.000338436	3.47052	79	163	7	35670	TREM2,SLA-DOB,TAP2,PSMB8,TAP1,SLA-DMB,SLA-DMA
GO:BP	regulation of DNA-templated transcription	GO:0006355	0.000402533	3.3952	2810	304	52	35670	HNRNPU,HAND1,SAP30L,ADORA3,WDR77,LRIF1,CDK12,MED1,TBX21,SP6,NFE2L1,CDK5RAP3,SP2,SKAP1,HMGB1,FOXP4,GPBP1,ENG,PTGES2,RNF6,DKK1,MMS19,ANKRD2,SFRP5,PRDM6,SIRT1,ATOH7,CCAR1,STOX1,DDX21,BRD2,RING1,RXRB,BMP5,IL17A,ZNF215,ISL1,STAT6,ZBTB39,MEF2C,CLOCK,KAT2B,NCOA4,MBD2,CRY1,MTERF2,RFX4,E2F3,GCM1,SIM2,PRDX5,ESRRA
GO:BP	regulation of nucleic acid-templated transcription	GO:1903506	0.00041167	3.38545	2812	304	52	35670	HNRNPU,HAND1,SAP30L,ADORA3,WDR77,LRIF1,CDK12,MED1,TBX21,SP6,NFE2L1,CDK5RAP3,SP2,SKAP1,HMGB1,FOXP4,GPBP1,ENG,PTGES2,RNF6,DKK1,MMS19,ANKRD2,SFRP5,PRDM6,SIRT1,ATOH7,CCAR1,STOX1,DDX21,BRD2,RING1,RXRB,BMP5,IL17A,ZNF215,ISL1,STAT6,ZBTB39,MEF2C,CLOCK,KAT2B,NCOA4,MBD2,CRY1,MTERF2,RFX4,E2F3,GCM1,SIM2,PRDX5,ESRRA
GO:BP	regulation of biosynthetic process	GO:0009889	0.000443554	3.35305	3340	203	44	35670	HNRNPU,HAND1,SAP30L,LRPPRC,ADORA3,WDR77,LRIF1,CDK12,MED1,TBX21,SP6,NFE2L1,CDK5RAP3,SP2,SKAP1,HMGB1,FOXP4,GPBP1,ENG,PTGES2,GLE1,RNF6,DKK1,MMS19,ANKRD2,SFRP5,PRDM6,SIRT1,ATOH7,CCAR1,STOX1,DDX21,EIF3E,BRD2,RING1,RXRB,BMP5,IL17A,IREB2,ZNF215,ISL1,PTGES3,STAT6,ZBTB39
GO:BP	negative regulation of cellular process	GO:0048523	0.00044733	3.34937	3617	377	72	35670	HNRNPU,HAND1,PPM1B,LRPPRC,RAP1A,ADORA3,WDR77,CDK12,MED1,TBX21,CDK5RAP3,SP2,RAP2B,LIN28B,DPT,XCL1,TREM2,FOXP4,USP25,ENG,PIP5KL1,SPTAN1,ENDOG,DKK1,PRKG1,SFRP5,PRDM6,SIRT1,HERC4,PBLD,CCAR1,RING1,BMP5,IREB2,NRG3,IL7R,RANBP3L,ISL1,STAT6,ZBTB39,GLRA1,MEF2C,BID,CLOCK,KAT2B,ALOX5,ITGA1,SLIT3,MBD2,DCUN1D3,CRY1,RFX4,E2F3,RASL11B,MORC3,SIM2,TTK,PRDX5,GPR137,BAD,OTUB1,RCOR2,DDB1,CNTF,LPXN,CTNND1,BTBD18,EIF4E…
GO:BP	regulation of RNA biosynthetic process	GO:2001141	0.000470746	3.32721	2824	304	52	35670	HNRNPU,HAND1,SAP30L,ADORA3,WDR77,LRIF1,CDK12,MED1,TBX21,SP6,NFE2L1,CDK5RAP3,SP2,SKAP1,HMGB1,FOXP4,GPBP1,ENG,PTGES2,RNF6,DKK1,MMS19,ANKRD2,SFRP5,PRDM6,SIRT1,ATOH7,CCAR1,STOX1,DDX21,BRD2,RING1,RXRB,BMP5,IL17A,ZNF215,ISL1,STAT6,ZBTB39,MEF2C,CLOCK,KAT2B,NCOA4,MBD2,CRY1,MTERF2,RFX4,E2F3,GCM1,SIM2,PRDX5,ESRRA
GO:BP	catabolic process	GO:0009056	0.000483281	3.3158	2003	377	48	35670	HNRNPU,LRPPRC,CHIA,DRAM2,FBXL20,NPEPPS,TBX21,OSBPL7,CDK5RAP3,LIN28B,HMGB1,TREM2,USP25,ENDOG,RNF6,USP12,EXOSC1,HOGA1,SIRT1,HERC4,EIF3E,PSMB8,PSMB9,HMGCLL1,PSMA4,SKP2,HSD17B6,MMP13,CLOCK,PELO,UMOD,CRY1,GCSH,FBXO9,USP46,BCKDHB,PRDX5,GPR137,BAD,PLCB3,FEN1,DAGLA,DDB1,ADH7,ADH4,ADH5,PAN2,RDX
GO:BP	regulation of cell communication	GO:0010646	0.000496831	3.30379	2581	369	56	35670	PREPL,PPM1B,RAP1A,MED1,FBXL20,CDK5RAP3,XCL1,TREM2,ENG,DNM1,ZDHHC12,ENDOG,RNF6,DKK1,AVPI1,SFRP5,CSNK1G3,SIRT1,HERC4,PBLD,STOX1,DDX21,RSPO2,BMP5,GFRAL,CHRNA5,SYT9,NRG3,IL7R,SKP2,ISL1,GLRA1,PDGFD,BID,CLOCK,IGFBP7,EFHB,ALOX5,ITGA1,PELO,SLIT3,MBD2,CRY1,RFX4,FBXO9,USP46,RASL11B,GPR137,BAD,LPXN,CTNND1,ZDHHC5,EIF4E,TSPAN5,RAP1GDS1,STAT2
GO:BP	lipid metabolic process	GO:0006629	0.000533952	3.2725	1078	370	32	35670	PLB1,CEPT1,MED1,NFE2L1,TREM2,ST6GALNAC6,PIP5KL1,DPM2,PTGES2,SIRT1,HSD17B8,BMP5,HMGCLL1,PTGES3,HSD17B6,SDR9C7,ALOX5,ACSM3,ACSM4,ACSM5,UMOD,CWH43,PIGP,PLCB3,NAA40,FADS2,FADS3,FADS1,DAGLA,ADH7,ADH4,APOF
GO:BP	lipid biosynthetic process	GO:0008610	0.000543744	3.26461	524	331	20	35670	CEPT1,MED1,ST6GALNAC6,PIP5KL1,DPM2,PTGES2,SIRT1,HSD17B8,BMP5,HMGCLL1,PTGES3,ALOX5,ACSM3,ACSM4,ACSM5,CWH43,PIGP,FADS2,FADS3,FADS1
GO:BP	cellular localization	GO:0051641	0.000552096	3.25799	2649	246	43	35670	HNRNPU,PREPL,RAP1A,MED1,FBXL20,STAC2,KPNB1,CDK5RAP3,SKAP1,SNX11,P2RY1,BLZF1,ATP1B1,XCL1,TSPO2,TREM2,COG1,LCN2,CIZ1,DNM1,ODF2,GLE1,WDR34,ZDHHC12,TBC1D13,SLIT1,ZFYVE27,CEP120,EMC2,TAP2,TAP1,CHRNA5,IREB2,SYT9,RANBP3L,NACA,STAC3,IPO8,BID,CLOCK,KAT2B,NCOA4,ALOX5
GO:BP	regulation of response to stimulus	GO:0048583	0.000566142	3.24707	2989	371	62	35670	PPM1B,RAP1A,MED1,TBX21,CDK5RAP3,SKAP1,XCL1,TREM2,USP25,ENG,ENDOG,RNF6,DKK1,PRKG1,MMS19,AVPI1,SFRP5,CSNK1G3,SIRT1,HERC4,ATOH7,PBLD,STOX1,DDX21,RSPO2,TAP2,SLA-DMB,BMP5,GFRAL,IL17A,IL7R,SKP2,ISL1,STAT6,PDGFD,IL17RA,BID,CLOCK,IGFBP7,EFHB,PARG,ALOX5,ITGA1,PELO,SLIT3,MBD2,CRY1,RFX4,FBXO9,RASL11B,GPR137,BAD,VEGFB,OTUB1,DAGLA,LPXN,CTNND1,ZDHHC5,TSPAN5,RAP1GDS1,STAT2,TIMELESS
GO:BP	cellular aromatic compound metabolic process	GO:0006725	0.000620457	3.20729	6606	322	98	35670	TRMT61B,HNRNPU,HAND1,SAP30L,SNORA25,LRPPRC,ADORA3,WDR77,CEPT1,LRIF1,CDK12,MED1,TBX21,SP6,PNPO,NFE2L1,CDK5RAP3,SP2,SKAP1,MBNL1,LIN28B,HMGB1,USPL1,NME7,ATP1B1,FOXP4,GPBP1,FPGS,ENG,AK1,SLC25A25,PTGES2,CIZ1,SWI5,URM1,ENDOG,RNF6,DKK1,EXOSC1,MMS19,ANKRD2,SFRP5,PRDM6,SIRT1,ATOH7,HNRNPH3,CCAR1,STOX1,DDX21,EIF3E,BRD2,RING1,RXRB,BMP5,IL17A,MCM3,IREB2,ZNF215,NADK2,ISL1,PTGES3,PRIM1,STAT6,ZBTB39,MEF2C,SNORA7…
GO:BP	cellular component organization	GO:0016043	0.000624973	3.20414	6165	197	64	35670	CLIP4,TRMT61B,SPDYA,HNRNPU,CAMKMT,RAP1A,LRIF1,CD53,KCNA3,KPNB1,CDK5RAP3,SKAP1,SNX11,KATNAL1,HMGB1,USPL1,ALOX5AP,BLZF1,DPT,TSPO2,TREM2,CDC42EP4,COG1,DNM1,ODF2,GLE1,SPTAN1,WDR34,SET,ZDHHC12,ENDOG,ATP8A2,WASF3,KLHL1,DKK1,PRKG1,SLIT1,MMS19,ZFYVE27,LOXL4,CEP120,FLRT2,SIRT1,MYPN,ATOH7,STOX1,DDX21,EMC2,EIF3E,SLA-DOB,SLA-DMB,SLA-DMA,BRD2,HSD17B8,COL11A2,BMP5,IL17A,MCM3,SYT9,OR10A4,SPEF2,IL7R,ISL1,PTGES3
GO:BP	carboxylic acid biosynthetic process	GO:0046394	0.000651606	3.18601	257	331	14	35670	CEPT1,ALOX5AP,PTGES2,HOGA1,SIRT1,HSD17B8,PTGES3,ALOX5,ACSM3,ACSM4,ACSM5,FADS2,FADS3,FADS1
GO:BP	steroid hormone mediated signaling pathway	GO:0043401	0.000657772	3.18192	97	304	9	35670	MED1,RNF6,SIRT1,RXRB,SKP2,PTGES3,CLOCK,CRY1,ESRRA
GO:BP	organic acid biosynthetic process	GO:0016053	0.000683299	3.16539	258	331	14	35670	CEPT1,ALOX5AP,PTGES2,HOGA1,SIRT1,HSD17B8,PTGES3,ALOX5,ACSM3,ACSM4,ACSM5,FADS2,FADS3,FADS1
GO:BP	purine-containing compound metabolic process	GO:0072521	0.00102801	2.988	367	318	16	35670	CEPT1,NME7,ATP1B1,AK1,SLC25A25,SIRT1,NADK2,PARG,PANK3,ACSM3,ACSM4,ACSM5,SLC22A12,SLC22A11,BAD,MACROD1
GO:BP	hormone-mediated signaling pathway	GO:0009755	0.00113102	2.94653	135	304	10	35670	MED1,SSTR2,RNF6,SIRT1,RXRB,SKP2,PTGES3,CLOCK,CRY1,ESRRA
GO:BP	positive regulation of nucleobase-containing compound metabolic process	GO:0045935	0.00117588	2.92964	1633	243	31	35670	HNRNPU,HAND1,WDR77,CDK12,MED1,TBX21,CDK5RAP3,SKAP1,LIN28B,GPBP1,ENG,PTGES2,CIZ1,ENDOG,RNF6,MMS19,SIRT1,ATOH7,CCAR1,STOX1,DDX21,RXRB,BMP5,IL17A,ISL1,PTGES3,STAT6,MEF2C,CLOCK,KAT2B,NCOA4
GO:BP	regulation of signaling	GO:0023051	0.00121097	2.91687	2584	369	55	35670	PREPL,PPM1B,RAP1A,MED1,FBXL20,CDK5RAP3,XCL1,TREM2,ENG,DNM1,ZDHHC12,ENDOG,RNF6,DKK1,AVPI1,SFRP5,CSNK1G3,SIRT1,HERC4,PBLD,STOX1,DDX21,RSPO2,BMP5,GFRAL,CHRNA5,SYT9,NRG3,IL7R,SKP2,ISL1,PDGFD,BID,CLOCK,IGFBP7,EFHB,ALOX5,ITGA1,PELO,SLIT3,MBD2,CRY1,RFX4,FBXO9,USP46,RASL11B,GPR137,BAD,LPXN,CTNND1,ZDHHC5,EIF4E,TSPAN5,RAP1GDS1,STAT2
GO:BP	unsaturated fatty acid metabolic process	GO:0033559	0.00127488	2.89453	70	333	8	35670	PTGES2,SIRT1,PTGES3,ALOX5,FADS2,FADS3,FADS1,DAGLA
GO:BP	organic substance catabolic process	GO:1901575	0.00136825	2.86384	1696	377	42	35670	HNRNPU,LRPPRC,CHIA,FBXL20,NPEPPS,TBX21,OSBPL7,CDK5RAP3,LIN28B,USP25,ENDOG,RNF6,USP12,EXOSC1,HOGA1,SIRT1,HERC4,EIF3E,PSMB8,PSMB9,HMGCLL1,PSMA4,SKP2,HSD17B6,CLOCK,PELO,UMOD,GCSH,FBXO9,USP46,BCKDHB,PRDX5,BAD,PLCB3,FEN1,DAGLA,DDB1,ADH7,ADH4,ADH5,PAN2,RDX
GO:BP	cell surface receptor signaling pathway	GO:0007166	0.00168532	2.77332	2204	369	49	35670	PPM1B,ADORA3,MED1,SKAP1,P2RY1,XCL1,TREM2,ENG,DKK1,ZFYVE27,SFRP5,CSNK1G3,FLRT2,SIRT1,HERC4,PBLD,RSPO2,BMP5,GFRAL,IL17A,CHRNA5,CHRNA3,NRG3,IL7R,ISL1,STAT6,GLRA1,PDGFD,IL17RA,BID,ITGA1,PELO,ITGA2,SLIT3,MBD2,UMOD,BTBD11,RFX4,RASL11B,BAD,VEGFB,FERMT3,DAGLA,DDB1,CNTF,LPXN,CTNND1,TSPAN5,STAT2
GO:BP	cellular nitrogen compound metabolic process	GO:0034641	0.0017188	2.76478	7120	322	102	35670	TRMT61B,HNRNPU,HAND1,SAP30L,SNORA25,LRPPRC,ADORA3,WDR77,CEPT1,LRIF1,CDK12,MED1,RPL19,TBX21,MRPL10,SP6,PNPO,NFE2L1,CDK5RAP3,SP2,SKAP1,MBNL1,LIN28B,HMGB1,USPL1,NME7,ATP1B1,FOXP4,GPBP1,FPGS,ENG,AK1,ST6GALNAC6,SLC25A25,PTGES2,CIZ1,SWI5,URM1,GLE1,ENDOG,RNF6,DKK1,EXOSC1,MMS19,ANKRD2,SFRP5,PRDM6,SIRT1,ATOH7,HNRNPH3,CCAR1,STOX1,DDX21,EIF3E,BRD2,RING1,RXRB,BMP5,IL17A,MCM3,IREB2,ZNF215,NADK2,ISL1,PTGES3,PR…
GO:BP	positive regulation of cellular biosynthetic process	GO:0031328	0.00175673	2.7553	1580	282	33	35670	HNRNPU,HAND1,WDR77,CDK12,MED1,TBX21,CDK5RAP3,SKAP1,GPBP1,ENG,PTGES2,RNF6,MMS19,SIRT1,ATOH7,CCAR1,STOX1,DDX21,EIF3E,RXRB,BMP5,IL17A,ISL1,PTGES3,STAT6,MEF2C,CLOCK,KAT2B,NCOA4,CRY1,RFX4,E2F3,GCM1
GO:BP	cellular response to lipid	GO:0071396	0.0018882	2.72395	348	308	15	35670	HNRNPU,MED1,OSBPL7,TREM2,SSTR2,RNF6,SIRT1,RXRB,SKP2,PTGES3,CLOCK,CRY1,ESRRA,KCNK4,BAD
GO:BP	cellular component organization or biogenesis	GO:0071840	0.00191196	2.71852	6355	197	64	35670	CLIP4,TRMT61B,SPDYA,HNRNPU,CAMKMT,RAP1A,LRIF1,CD53,KCNA3,KPNB1,CDK5RAP3,SKAP1,SNX11,KATNAL1,HMGB1,USPL1,ALOX5AP,BLZF1,DPT,TSPO2,TREM2,CDC42EP4,COG1,DNM1,ODF2,GLE1,SPTAN1,WDR34,SET,ZDHHC12,ENDOG,ATP8A2,WASF3,KLHL1,DKK1,PRKG1,SLIT1,MMS19,ZFYVE27,LOXL4,CEP120,FLRT2,SIRT1,MYPN,ATOH7,STOX1,DDX21,EMC2,EIF3E,SLA-DOB,SLA-DMB,SLA-DMA,BRD2,HSD17B8,COL11A2,BMP5,IL17A,MCM3,SYT9,OR10A4,SPEF2,IL7R,ISL1,PTGES3
GO:BP	response to stress	GO:0006950	0.00196319	2.70704	2817	371	58	35670	SPDYA,PPM1B,CHIA,MED1,FBXL20,NPEPPS,NFE2L1,CDK5RAP3,P2RY1,RAP2B,HMGB1,ALOX5AP,XCL1,TREML1,TREM2,TREM-1,CDC42EP4,USP25,LCN2,SWI5,PRKG1,MMS19,MORN4,SIRT1,STOX1,TAP1,IL17A,MCM3,IL7R,SKP2,ISL1,STAT6,NMUR2,DCUN1D5,IL17RA,BID,CLOCK,PARG,ALOX5,UMOD,CRY1,FBXO9,USP46,MORC3,PRDX5,BAD,PPP1R14B,VEGFB,FERMT3,MACROD1,OTUB1,FEN1,DAGLA,DDB1,ZDHHC5,EIF4E,STAT2,TIMELESS
GO:BP	positive regulation of nucleic acid-templated transcription	GO:1903508	0.00200167	2.69861	1360	282	30	35670	HNRNPU,HAND1,WDR77,CDK12,MED1,TBX21,CDK5RAP3,SKAP1,GPBP1,ENG,PTGES2,RNF6,MMS19,SIRT1,ATOH7,CCAR1,STOX1,DDX21,RXRB,BMP5,IL17A,ISL1,STAT6,MEF2C,CLOCK,KAT2B,NCOA4,RFX4,E2F3,GCM1
GO:BP	positive regulation of DNA-templated transcription	GO:0045893	0.00200167	2.69861	1360	282	30	35670	HNRNPU,HAND1,WDR77,CDK12,MED1,TBX21,CDK5RAP3,SKAP1,GPBP1,ENG,PTGES2,RNF6,MMS19,SIRT1,ATOH7,CCAR1,STOX1,DDX21,RXRB,BMP5,IL17A,ISL1,STAT6,MEF2C,CLOCK,KAT2B,NCOA4,RFX4,E2F3,GCM1
GO:BP	response to chemical	GO:0042221	0.00200581	2.69771	3825	371	72	35670	HNRNPU,RAP1A,MED1,NPEPPS,TBX21,OSBPL7,NFE2L1,CDK5RAP3,P2RY1,HMGB1,ALOX5AP,XCL1,TREM2,CDC42EP4,SSTR2,USP25,SLC25A25,ENDOG,RNF6,SLIT1,FLRT2,SIRT1,ATOH7,STOX1,DDX21,TAP2,RXRB,IL17A,CHRNA5,CHRNA3,SYT9,OR10A4,NRG3,IL7R,SKP2,ISL1,PTGES3,STAT6,GLRA1,PDGFD,MEF2C,IL17RA,CLOCK,KAT2B,ALOX5,ITGA1,SLIT3,UMOD,CRY1,GSTA4,USP46,BCKDHB,SLC22A12,PRDX5,ESRRA,KCNK4,BAD,VEGFB,STIP1,SYT7,CNTF,OR5B21,OR5B3,OR10Q1,OR9Q2…
GO:BP	cellular response to hormone stimulus	GO:0032870	0.00209201	2.67944	380	365	17	35670	HNRNPU,MED1,SSTR2,RNF6,SIRT1,RXRB,SKP2,PTGES3,STAT6,MEF2C,CLOCK,KAT2B,SLIT3,CRY1,ESRRA,EIF4E,RAP1GDS1
GO:BP	carbohydrate derivative metabolic process	GO:1901135	0.00215755	2.66604	857	329	25	35670	GALNT10,CEPT1,CHIA,NME7,ATP1B1,AK1,ST6GALNAC6,ST6GALNAC2,DPM2,SLC25A25,SIRT1,EXT2,TMEM165,PARG,ALOX5,PANK3,ACSM3,ACSM4,ACSM5,CWH43,PIGP,BAD,VEGFB,MACROD1,TMEM258
GO:BP	positive regulation of RNA biosynthetic process	GO:1902680	0.00222663	2.65235	1367	282	30	35670	HNRNPU,HAND1,WDR77,CDK12,MED1,TBX21,CDK5RAP3,SKAP1,GPBP1,ENG,PTGES2,RNF6,MMS19,SIRT1,ATOH7,CCAR1,STOX1,DDX21,RXRB,BMP5,IL17A,ISL1,STAT6,MEF2C,CLOCK,KAT2B,NCOA4,RFX4,E2F3,GCM1
GO:BP	positive regulation of macromolecule biosynthetic process	GO:0010557	0.00224701	2.6484	1520	282	32	35670	HNRNPU,HAND1,WDR77,CDK12,MED1,TBX21,CDK5RAP3,SKAP1,GPBP1,ENG,PTGES2,RNF6,MMS19,SIRT1,ATOH7,CCAR1,STOX1,DDX21,EIF3E,RXRB,BMP5,IL17A,ISL1,PTGES3,STAT6,MEF2C,CLOCK,KAT2B,NCOA4,RFX4,E2F3,GCM1
GO:BP	cell population proliferation	GO:0008283	0.002362	2.62672	1443	312	33	35670	SPDYA,HNRNPU,ADORA3,WDR77,MED1,CDK5RAP3,USPL1,DPT,XCL1,PRKG1,SFRP5,CEP120,SIRT1,CCAR1,SLA-DMB,BMP5,IL7R,ISL1,PTGES3,STAT6,PDGFD,MEF2C,BID,KAT2B,ALOX5,ITGA1,PELO,SLIT3,MBD2,E2F3,MORC3,BAD,VEGFB
GO:BP	response to lipid	GO:0033993	0.0023923	2.62118	455	308	17	35670	HNRNPU,MED1,OSBPL7,TREM2,SSTR2,RNF6,SIRT1,RXRB,SKP2,PTGES3,CLOCK,SLIT3,UMOD,CRY1,ESRRA,KCNK4,BAD
GO:BP	signal transduction	GO:0007165	0.00240091	2.61962	5922	371	99	35670	PPM1B,RAP1A,ADORA3,MED1,KPNB1,CDK5RAP3,SKAP1,P2RY1,RAP2B,HMGB1,ATP1B1,XCL1,TREM2,CDC42EP4,SSTR2,ENG,PKN3,ENDOG,RNF6,DKK1,PRKG1,AVPI1,ZFYVE27,SFRP5,CSNK1G3,FLRT2,SIRT1,HERC4,PBLD,STOX1,DDX21,RSPO2,RXRB,BMP5,GFRAL,IL17A,CHRNA5,CHRNA3,OLFML1,OR10A4,NRG3,IL7R,LMBRD2,SKP2,ISL1,PTGES3,STAT6,TAC3,GPR182,NMUR2,GLRA1,PDGFD,MEF2C,PDE7A,IL17RA,BID,NMU,CLOCK,IGFBP7,EFHB,ITGA1,PELO,ITGA2,SLIT3,TENM2,MBD2,UMOD…
GO:BP	protein localization to plasma membrane	GO:0072659	0.00266761	2.57388	230	76	7	35670	PREPL,RAP1A,STAC2,SKAP1,BLZF1,ATP1B1,TREM2
GO:BP	positive regulation of biosynthetic process	GO:0009891	0.00277674	2.55646	1613	282	33	35670	HNRNPU,HAND1,WDR77,CDK12,MED1,TBX21,CDK5RAP3,SKAP1,GPBP1,ENG,PTGES2,RNF6,MMS19,SIRT1,ATOH7,CCAR1,STOX1,DDX21,EIF3E,RXRB,BMP5,IL17A,ISL1,PTGES3,STAT6,MEF2C,CLOCK,KAT2B,NCOA4,CRY1,RFX4,E2F3,GCM1
GO:BP	cellular response to organic substance	GO:0071310	0.00310006	2.50863	1465	371	37	35670	HNRNPU,RAP1A,MED1,TBX21,OSBPL7,CDK5RAP3,P2RY1,XCL1,TREM2,CDC42EP4,SSTR2,RNF6,SIRT1,RXRB,IL17A,IL7R,SKP2,PTGES3,STAT6,GLRA1,PDGFD,MEF2C,IL17RA,CLOCK,KAT2B,SLIT3,UMOD,CRY1,ESRRA,KCNK4,BAD,STIP1,CNTF,EIF4E,RAP1GDS1,STAT2,TIMELESS
GO:BP	positive regulation of RNA metabolic process	GO:0051254	0.00340283	2.46816	1472	282	31	35670	HNRNPU,HAND1,WDR77,CDK12,MED1,TBX21,CDK5RAP3,SKAP1,LIN28B,GPBP1,ENG,PTGES2,RNF6,MMS19,SIRT1,ATOH7,CCAR1,STOX1,DDX21,RXRB,BMP5,IL17A,ISL1,STAT6,MEF2C,CLOCK,KAT2B,NCOA4,RFX4,E2F3,GCM1
GO:BP	transcription by RNA polymerase II	GO:0006366	0.00410985	2.38617	2051	304	40	35670	HNRNPU,HAND1,WDR77,CDK12,MED1,TBX21,SP6,NFE2L1,CDK5RAP3,SP2,SKAP1,HMGB1,FOXP4,GPBP1,ENG,DKK1,ANKRD2,PRDM6,SIRT1,ATOH7,STOX1,DDX21,BRD2,RXRB,BMP5,IL17A,ISL1,STAT6,ZBTB39,MEF2C,CLOCK,POLR2B,KAT2B,MBD2,CRY1,RFX4,E2F3,GCM1,SIM2,ESRRA
GO:BP	nucleobase-containing compound metabolic process	GO:0006139	0.00431843	2.36467	6445	282	84	35670	TRMT61B,HNRNPU,HAND1,SAP30L,SNORA25,LRPPRC,ADORA3,WDR77,CEPT1,LRIF1,CDK12,MED1,TBX21,SP6,NFE2L1,CDK5RAP3,SP2,SKAP1,MBNL1,LIN28B,HMGB1,USPL1,NME7,ATP1B1,FOXP4,GPBP1,ENG,AK1,SLC25A25,PTGES2,CIZ1,SWI5,URM1,ENDOG,RNF6,DKK1,EXOSC1,MMS19,ANKRD2,SFRP5,PRDM6,SIRT1,ATOH7,HNRNPH3,CCAR1,STOX1,DDX21,EIF3E,BRD2,RING1,RXRB,BMP5,IL17A,MCM3,ZNF215,NADK2,ISL1,PTGES3,PRIM1,STAT6,ZBTB39,MEF2C,SNORA79,CLOCK,POLR2B,K…
GO:BP	regulation of developmental process	GO:0050793	0.00467067	2.33062	1796	201	28	35670	HNRNPU,RAP1A,WDR77,CD53,CDK12,MED1,TBX21,SP6,P2RY1,MEDAG,CDC42EP4,ENG,ATP8A2,WASF3,DKK1,ZFYVE27,SFRP5,PRDM6,FLRT2,SIRT1,STOX1,RSPO2,BMP5,IL17A,IL7R,RANBP3L,ISL1,STAT6
GO:BP	antigen processing and presentation of peptide antigen via MHC class II	GO:0002495	0.00515	2.28819	18	163	4	35670	TREM2,SLA-DOB,SLA-DMB,SLA-DMA
GO:BP	positive regulation of response to stimulus	GO:0048584	0.00655718	2.18328	1665	258	31	35670	PPM1B,RAP1A,MED1,TBX21,CDK5RAP3,SKAP1,XCL1,TREM2,ENG,DKK1,MMS19,AVPI1,CSNK1G3,SIRT1,STOX1,DDX21,RSPO2,TAP2,SLA-DMB,BMP5,GFRAL,IL17A,IL7R,SKP2,STAT6,PDGFD,IL17RA,BID,CLOCK,PELO,MBD2
GO:BP	unsaturated fatty acid biosynthetic process	GO:0006636	0.00755882	2.12155	40	331	6	35670	PTGES2,SIRT1,PTGES3,FADS2,FADS3,FADS1
GO:BP	protein localization to cell periphery	GO:1990778	0.0075765	2.12053	269	76	7	35670	PREPL,RAP1A,STAC2,SKAP1,BLZF1,ATP1B1,TREM2
GO:BP	adaptive immune response	GO:0002250	0.00762004	2.11804	312	201	11	35670	TBX21,SKAP1,XCL1,SIRT1,SLA-DOB,TAP2,TAP1,SLA-DMB,SLA-DMA,IL7R,STAT6
GO:BP	ribonucleotide metabolic process	GO:0009259	0.00807546	2.09283	293	308	13	35670	CEPT1,NME7,ATP1B1,AK1,SLC25A25,SIRT1,PARG,ALOX5,PANK3,ACSM3,ACSM4,ACSM5,BAD
GO:BP	positive regulation of protein neddylation	GO:2000436	0.0084496	2.07316	4	285	3	35670	DCUN1D5,DCUN1D3,DCUN1D4
GO:BP	regulation of cell population proliferation	GO:0042127	0.00859061	2.06598	1178	312	28	35670	SPDYA,HNRNPU,ADORA3,WDR77,MED1,DPT,XCL1,PRKG1,SFRP5,SIRT1,CCAR1,SLA-DMB,BMP5,IL7R,ISL1,STAT6,PDGFD,MEF2C,BID,KAT2B,ALOX5,ITGA1,SLIT3,MBD2,E2F3,MORC3,BAD,VEGFB
GO:BP	carboxylic acid metabolic process	GO:0019752	0.00884686	2.05321	735	360	23	35670	CEPT1,ALOX5AP,FPGS,PTGES2,HOGA1,SIRT1,HSD17B8,HMGCLL1,IREB2,PTGES3,ACCS,ALOX5,ACSM3,ACSM4,ACSM5,GCSH,BCKDHB,FADS2,FADS3,FADS1,DAGLA,ADH7,ADH4
GO:BP	icosanoid biosynthetic process	GO:0046456	0.00925486	2.03363	31	246	5	35670	ALOX5AP,PTGES2,SIRT1,PTGES3,ALOX5
GO:BP	regulation of protein metabolic process	GO:0051246	0.0101963	1.99156	2030	377	45	35670	SPDYA,HNRNPU,LRPPRC,CDK12,FBXL20,OSBPL7,CDK5RAP3,RAP2B,HMGB1,TREM2,USP25,ENG,PIP5KL1,GLE1,DKK1,SIRT1,STOX1,EIF3E,PSMB8,PSMB9,BMP5,IREB2,SKP2,ISL1,DCUN1D5,PDGFD,BID,KAT2B,ITGA1,DCUN1D3,GPRC5B,CRY1,RFX4,DCUN1D4,PRDX5,BAD,VEGFB,TRPT1,OTUB1,DDB1,CNTF,EIF4E,PAN2,STAT2,RDX
GO:BP	ribose phosphate metabolic process	GO:0019693	0.0108586	1.96423	301	308	13	35670	CEPT1,NME7,ATP1B1,AK1,SLC25A25,SIRT1,PARG,ALOX5,PANK3,ACSM3,ACSM4,ACSM5,BAD
GO:BP	regulation of transcription by RNA polymerase II	GO:0006357	0.0109722	1.95971	1976	304	38	35670	HNRNPU,HAND1,WDR77,CDK12,MED1,TBX21,SP6,NFE2L1,CDK5RAP3,SP2,SKAP1,HMGB1,FOXP4,GPBP1,ENG,DKK1,ANKRD2,PRDM6,SIRT1,ATOH7,STOX1,BRD2,RXRB,BMP5,IL17A,ISL1,STAT6,ZBTB39,MEF2C,CLOCK,KAT2B,MBD2,CRY1,RFX4,E2F3,GCM1,SIM2,ESRRA
GO:BP	macromolecule catabolic process	GO:0009057	0.0123142	1.90959	1111	193	20	35670	HNRNPU,LRPPRC,CHIA,FBXL20,TBX21,OSBPL7,CDK5RAP3,LIN28B,USP25,ENDOG,RNF6,USP12,EXOSC1,SIRT1,HERC4,EIF3E,PSMB8,PSMB9,PSMA4,SKP2
GO:BP	oxoacid metabolic process	GO:0043436	0.012363	1.90788	750	360	23	35670	CEPT1,ALOX5AP,FPGS,PTGES2,HOGA1,SIRT1,HSD17B8,HMGCLL1,IREB2,PTGES3,ACCS,ALOX5,ACSM3,ACSM4,ACSM5,GCSH,BCKDHB,FADS2,FADS3,FADS1,DAGLA,ADH7,ADH4
GO:BP	organic acid metabolic process	GO:0006082	0.0134951	1.86982	754	360	23	35670	CEPT1,ALOX5AP,FPGS,PTGES2,HOGA1,SIRT1,HSD17B8,HMGCLL1,IREB2,PTGES3,ACCS,ALOX5,ACSM3,ACSM4,ACSM5,GCSH,BCKDHB,FADS2,FADS3,FADS1,DAGLA,ADH7,ADH4
GO:BP	MHC class II protein complex assembly	GO:0002399	0.0136192	1.86585	7	163	3	35670	SLA-DOB,SLA-DMB,SLA-DMA
GO:BP	peptide antigen assembly with MHC class II protein complex	GO:0002503	0.0136192	1.86585	7	163	3	35670	SLA-DOB,SLA-DMB,SLA-DMA
GO:BP	antigen processing and presentation of peptide or polysaccharide antigen via MHC class II	GO:0002504	0.0146397	1.83447	23	163	4	35670	TREM2,SLA-DOB,SLA-DMB,SLA-DMA
GO:BP	intracellular steroid hormone receptor signaling pathway	GO:0030518	0.0173658	1.76031	85	272	7	35670	MED1,RNF6,SIRT1,SKP2,PTGES3,CLOCK,CRY1
GO:BP	gene expression	GO:0010467	0.0177171	1.75161	7093	371	110	35670	TRMT61B,HNRNPU,HAND1,SAP30L,PPM1B,SNORA25,LRPPRC,ADORA3,WDR77,CHIA,LRIF1,CDK12,MED1,RPL19,TBX21,MRPL10,SP6,NFE2L1,CDK5RAP3,SP2,SKAP1,MBNL1,LIN28B,HMGB1,USPL1,ATP1B1,XCL1,TREM2,FOXP4,SSC-LET-7C,GPBP1,ENG,PTGES2,URM1,GLE1,RNF6,DKK1,EXOSC1,MMS19,ANKRD2,SFRP5,PRDM6,SIRT1,ATOH7,HNRNPH3,CCAR1,STOX1,DDX21,EIF3E,BRD2,RING1,SSC-MIR-219A,RXRB,BMP5,SSC-MIR-206,SSC-MIR-133B,IL17A,IREB2,ZNF215,IL7R,ISL1,STAT6…
GO:BP	positive regulation of multicellular organismal process	GO:0051240	0.0181765	1.74049	1139	227	22	35670	CHIA,MED1,TBX21,XCL1,TREM2,ENG,ATP8A2,WASF3,ZFYVE27,FLRT2,SIRT1,STOX1,DDX21,SLA-DOB,SLA-DMB,SLA-DMA,IL17A,IL7R,ISL1,STAT6,MEF2C,IL17RA
GO:BP	organic substance transport	GO:0071702	0.018517	1.73243	2073	308	39	35670	PREPL,MED1,STAC2,KPNB1,OSBPL7,SNX11,BLZF1,ATP1B1,XCL1,TSPO2,TREM2,COG1,SLC25A25,GLE1,ZDHHC12,TBC1D13,ATP8A2,SIRT1,TAP2,TAP1,SYT9,RANBP3L,NACA,STAC3,NMUR2,SLC16A7,IPO8,BID,CLOCK,TMEM165,EFHB,NCOA4,ALOX5,UMOD,CRY1,E2F3,SLC22A12,SLC22A11,BAD
GO:BP	cellular response to organic cyclic compound	GO:0071407	0.019006	1.72111	372	304	14	35670	HNRNPU,RAP1A,MED1,OSBPL7,P2RY1,SSTR2,RNF6,SIRT1,RXRB,SKP2,PTGES3,CLOCK,CRY1,ESRRA
GO:BP	animal organ development	GO:0048513	0.0191065	1.71882	2206	312	41	35670	HNRNPU,HAND1,WDR77,MED1,SP6,CDK5RAP3,POPDC3,ENG,SLC25A25,ATP8A2,KLHL1,DKK1,PRKG1,SLIT1,CEP120,FLRT2,SIRT1,ATOH7,STOX1,RSPO2,COL11A2,BMP5,NRG3,IL7R,RANBP3L,ISL1,PTGES3,STAT6,MMP13,MEF2C,CECR2,CLOCK,ALOX5,SLIT3,UMOD,RFX4,GCM1,SGCB,SIM2,BAD,VEGFB
GO:BP	organophosphate metabolic process	GO:0019637	0.0226988	1.644	779	309	21	35670	CEPT1,PNPO,NME7,ATP1B1,AK1,PIP5KL1,DPM2,SLC25A25,SIRT1,NADK2,PARG,ALOX5,MOCS2,PANK3,ACSM3,ACSM4,ACSM5,CWH43,PIGP,BAD,PLCB3
GO:BP	positive regulation of gluconeogenesis	GO:0045722	0.0228107	1.64186	13	340	4	35670	SIRT1,KAT2B,CRY1,DDB1
GO:BP	macromolecule localization	GO:0033036	0.0230378	1.63756	2253	308	41	35670	HNRNPU,PREPL,RAP1A,MED1,STAC2,KPNB1,OSBPL7,CDK5RAP3,SKAP1,SNX11,BLZF1,ATP1B1,TSPO2,TREM2,COG1,CIZ1,ODF2,GLE1,ZDHHC12,TBC1D13,ATP8A2,ZFYVE27,CEP120,SIRT1,EMC2,SYT9,RANBP3L,NACA,STAC3,NMUR2,IPO8,BID,CLOCK,NCOA4,ALOX5,UMOD,CRY1,E2F3,MORC3,TTK,BAD
GO:BP	purine ribonucleotide metabolic process	GO:0009150	0.023769	1.62399	275	308	12	35670	CEPT1,NME7,ATP1B1,AK1,SLC25A25,SIRT1,PARG,PANK3,ACSM3,ACSM4,ACSM5,BAD
GO:BP	response to hormone	GO:0009725	0.0244733	1.61131	456	365	17	35670	HNRNPU,MED1,SSTR2,RNF6,SIRT1,RXRB,SKP2,PTGES3,STAT6,MEF2C,CLOCK,KAT2B,SLIT3,CRY1,ESRRA,EIF4E,RAP1GDS1
GO:BP	positive regulation of developmental process	GO:0051094	0.0254083	1.59502	932	220	19	35670	HNRNPU,RAP1A,CD53,MED1,TBX21,MEDAG,ENG,ATP8A2,ZFYVE27,FLRT2,SIRT1,STOX1,BMP5,IL17A,IL7R,RANBP3L,ISL1,STAT6,MEF2C
GO:BP	negative regulation of macromolecule metabolic process	GO:0010605	0.0264007	1.57839	2413	260	38	35670	HNRNPU,HAND1,PPM1B,LRPPRC,MED1,TBX21,CDK5RAP3,SP2,LIN28B,FOXP4,USP25,SSC-LET-7C,ENG,PIP5KL1,DKK1,PRDM6,SIRT1,CCAR1,STOX1,EIF3E,RING1,SSC-MIR-219A,SSC-MIR-206,SSC-MIR-133B,IREB2,ISL1,STAT6,ZBTB39,SSC-MIR-708,MEF2C,CLOCK,KAT2B,PELO,SLIT3,SSC-MIR-218B,SSC-MIR-103-1,MBD2,DCUN1D3
GO:BP	positive regulation of adaptive immune response	GO:0002821	0.0285628	1.5442	81	201	6	35670	TBX21,SKAP1,XCL1,SIRT1,TAP2,STAT6
GO:BP	muscle structure development	GO:0061061	0.0287771	1.54095	462	220	13	35670	HNRNPU,HAND1,CD53,MED1,POPDC3,ENG,DKK1,PRDM6,SIRT1,MYPN,RANBP3L,ISL1,MEF2C
GO:BP	response to organic cyclic compound	GO:0014070	0.0305322	1.51524	499	304	16	35670	HNRNPU,RAP1A,MED1,OSBPL7,P2RY1,SSTR2,RNF6,SIRT1,DDX21,RXRB,SKP2,PTGES3,CLOCK,SLIT3,CRY1,ESRRA
GO:BP	regulation of intracellular steroid hormone receptor signaling pathway	GO:0033143	0.0305992	1.51429	61	272	6	35670	MED1,RNF6,SIRT1,SKP2,CLOCK,CRY1
GO:BP	regulation of synaptic vesicle exocytosis	GO:2000300	0.0316069	1.50022	41	33	3	35670	PREPL,RAP1A,FBXL20
GO:BP	positive regulation of transcription by RNA polymerase II	GO:0045944	0.0325949	1.48685	1020	282	23	35670	HNRNPU,HAND1,CDK12,MED1,TBX21,CDK5RAP3,SKAP1,GPBP1,ENG,SIRT1,ATOH7,STOX1,RXRB,BMP5,IL17A,ISL1,STAT6,MEF2C,CLOCK,KAT2B,RFX4,E2F3,GCM1
GO:BP	cell migration	GO:0016477	0.0332323	1.47844	1154	268	24	35670	ADORA3,TBX21,RAP2B,XCL1,TREM2,ENG,PIP5KL1,PKN3,PRKG1,SLIT1,FLRT2,SIRT1,CCAR1,IL17A,NRG3,ISL1,PDGFD,MEF2C,ALOX5,ITGA1,ITGA2,UMOD,PDILT,GP2
GO:BP	positive regulation of immune effector process	GO:0002699	0.0364715	1.43805	179	201	8	35670	TBX21,XCL1,SIRT1,DDX21,TAP2,SLA-DMB,IL17A,STAT6
GO:BP	fatty acid metabolic process	GO:0006631	0.0376975	1.42369	289	360	13	35670	PTGES2,SIRT1,HSD17B8,PTGES3,ALOX5,ACSM3,ACSM4,ACSM5,FADS2,FADS3,FADS1,DAGLA,ADH4
GO:BP	nervous system development	GO:0007399	0.0392431	1.40624	1674	363	37	35670	RAP1A,MED1,TREM2,ZDHHC12,ATP8A2,WASF3,KLHL1,PRKG1,SLIT1,MARVELD1,ZFYVE27,PRDM6,CEP120,FLRT2,ATOH7,RSPO2,BRD2,BMP5,GFRAL,CHRNA3,OR10A4,NRG3,ISL1,NMUR2,MEF2C,CECR2,SLIT3,TENM2,RFX4,GCM1,SIM2,MARK2,RTN3,DAGLA,CNTF,CLP1,EIF4E
GO:BP	muscle cell differentiation	GO:0042692	0.0393854	1.40467	276	220	10	35670	HNRNPU,CD53,POPDC3,ENG,DKK1,PRDM6,SIRT1,MYPN,ISL1,MEF2C
GO:BP	protein localization to membrane	GO:0072657	0.0395272	1.4031	458	377	17	35670	PREPL,RAP1A,STAC2,SKAP1,BLZF1,ATP1B1,TREM2,ZDHHC12,ZFYVE27,EMC2,NACA,STAC3,BID,UMOD,ZDHHC5,TSPAN5,RDX
GO:BP	nucleotide metabolic process	GO:0009117	0.0411358	1.38578	396	265	13	35670	CEPT1,NME7,ATP1B1,AK1,SLC25A25,SIRT1,NADK2,PARG,ALOX5,PANK3,ACSM3,ACSM4,ACSM5
GO:BP	anatomical structure morphogenesis	GO:0009653	0.0442535	1.35405	2064	252	33	35670	HAND1,RAP1A,CD53,MED1,PLXDC1,SP6,P2RY1,CDC42EP4,ENG,ATP8A2,WASF3,DKK1,SLIT1,ZFYVE27,SFRP5,FLRT2,SIRT1,MYPN,ATOH7,STOX1,RSPO2,BRD2,COL11A2,OR10A4,NRG3,IL7R,ISL1,STAT6,MMP13,CECR2,ALOX5,ITGA2,SLIT3
GO:BP	negative regulation of metabolic process	GO:0009892	0.0466648	1.33101	2571	260	39	35670	HNRNPU,HAND1,PPM1B,LRPPRC,MED1,TBX21,CDK5RAP3,SP2,LIN28B,FOXP4,USP25,SSC-LET-7C,ENG,PIP5KL1,DKK1,PRDM6,SIRT1,CCAR1,STOX1,EIF3E,RING1,SSC-MIR-219A,BMP5,SSC-MIR-206,SSC-MIR-133B,IREB2,ISL1,STAT6,ZBTB39,SSC-MIR-708,MEF2C,CLOCK,KAT2B,PELO,SLIT3,SSC-MIR-218B,SSC-MIR-103-1,MBD2,DCUN1D3
GO:BP	purine nucleotide metabolic process	GO:0006163	0.0472463	1.32563	345	308	13	35670	CEPT1,NME7,ATP1B1,AK1,SLC25A25,SIRT1,NADK2,PARG,PANK3,ACSM3,ACSM4,ACSM5,BAD
GO:BP	establishment of localization in cell	GO:0051649	0.0482611	1.3164	1670	243	28	35670	HNRNPU,PREPL,RAP1A,MED1,FBXL20,KPNB1,SNX11,P2RY1,XCL1,TSPO2,DNM1,GLE1,WDR34,ZDHHC12,TBC1D13,SLIT1,CEP120,TAP2,TAP1,CHRNA5,IREB2,SYT9,RANBP3L,NACA,IPO8,BID,KAT2B,NCOA4
GO:BP	immune system process	GO:0002376	0.0486296	1.3131	1818	312	35	35670	MED1,TBX21,CDK5RAP3,SKAP1,HMGB1,XCL1,TSPO2,TREM2,TREM-1,CDC42EP4,SIRT1,DDX21,SLA-DOB,TAP2,PSMB8,TAP1,PSMB9,SLA-DMB,SLA-DMA,SLC39A7,IL17A,IREB2,IL7R,SKP2,STAT6,BID,ALOX5,ITGA1,UMOD,GP2,FBXO9,GPR137,BAD,PPP1R14B,VEGFB
GO:BP	locomotion	GO:0040011	0.0498554	1.30229	1010	252	21	35670	ADORA3,RAP2B,HMGB1,XCL1,TREM2,ENG,PIP5KL1,PRKG1,SLIT1,FLRT2,SIRT1,ATOH7,CCAR1,OR10A4,NRG3,ISL1,PDGFD,MEF2C,ALOX5,ITGA1,SLIT3
GO:CC	cellular_component	GO:0005575	9.14715e-43	42.0387	19669	377	334	35670	CLIP4,TRMT61B,PPP1CB,SPDYA,HNRNPU,EFCAB2,HAND1,SAP30L,GALNT10,MFAP3,CAMKMT,PREPL,PPM1B,SNORA25,LRPPRC,RAP1A,ADORA3,WDR77,OVGP1,CEPT1,CHIA,CHI3L2,DRAM2,LRIF1,CD53,KCNA3,CDK12,MED1,FBXL20,STAC2,RPL19,PLXDC1,NPEPPS,KPNB1,TBX21,OSBPL7,MRPL10,NFE2L1,CDK5RAP3,SP2,SKAP1,SNX11,MBNL1,P2RY1,RAP2B,LIN28B,POPDC3,PREP,KATNAL1,HMGB1,USPL1,ALOX5AP,MEDAG,HSPH1,ACP1,CCDC181,BLZF1,NME7,ATP1B1,DPT,XCL1,TSPO2,TREML1…
GO:CC	cellular anatomical entity	GO:0110165	6.81722e-39	38.1664	19297	377	326	35670	CLIP4,TRMT61B,PPP1CB,SPDYA,HNRNPU,EFCAB2,HAND1,SAP30L,GALNT10,MFAP3,CAMKMT,PREPL,PPM1B,SNORA25,LRPPRC,RAP1A,ADORA3,WDR77,OVGP1,CEPT1,CHIA,CHI3L2,DRAM2,LRIF1,CD53,KCNA3,CDK12,MED1,FBXL20,STAC2,RPL19,PLXDC1,NPEPPS,KPNB1,TBX21,OSBPL7,MRPL10,NFE2L1,CDK5RAP3,SP2,SKAP1,SNX11,MBNL1,P2RY1,RAP2B,LIN28B,POPDC3,PREP,KATNAL1,HMGB1,USPL1,ALOX5AP,MEDAG,HSPH1,ACP1,CCDC181,BLZF1,NME7,ATP1B1,DPT,XCL1,TSPO2,TREML1…
GO:CC	membrane-bounded organelle	GO:0043227	3.3757e-24	23.4716	11539	340	206	35670	CLIP4,TRMT61B,PPP1CB,SPDYA,HNRNPU,EFCAB2,HAND1,SAP30L,GALNT10,MFAP3,CAMKMT,PREPL,PPM1B,SNORA25,LRPPRC,RAP1A,WDR77,OVGP1,CEPT1,DRAM2,LRIF1,CDK12,MED1,KPNB1,TBX21,OSBPL7,MRPL10,NFE2L1,CDK5RAP3,SP2,SKAP1,SNX11,MBNL1,P2RY1,RAP2B,LIN28B,PREP,HMGB1,USPL1,ALOX5AP,HSPH1,CCDC181,BLZF1,ATP1B1,TSPO2,TREML1,FOXP4,CDC42EP4,COG1,SLC39A11,USP25,MIER3,GPBP1,FPGS,ENG,AK1,ST6GALNAC6,ST6GALNAC2,DPM2,SLC25A25,PTGES2…
GO:CC	intracellular anatomical structure	GO:0005622	4.10441e-24	23.3867	13965	377	250	35670	CLIP4,TRMT61B,PPP1CB,SPDYA,HNRNPU,HAND1,SAP30L,GALNT10,MFAP3,CAMKMT,PREPL,PPM1B,SNORA25,LRPPRC,RAP1A,WDR77,OVGP1,CEPT1,DRAM2,LRIF1,CDK12,MED1,RPL19,PLXDC1,NPEPPS,KPNB1,TBX21,OSBPL7,MRPL10,NFE2L1,CDK5RAP3,SP2,SKAP1,SNX11,MBNL1,RAP2B,LIN28B,PREP,KATNAL1,HMGB1,USPL1,ALOX5AP,MEDAG,HSPH1,ACP1,CCDC181,BLZF1,NME7,TSPO2,TREML1,FOXP4,CDC42EP4,COG1,SSTR2,SLC39A11,USP25,MIER3,GPBP1,FPGS,ENG,AK1,ST6GALNAC6,S…
GO:CC	cytoplasm	GO:0005737	1.86582e-23	22.7291	9056	377	191	35670	CLIP4,TRMT61B,PPP1CB,HNRNPU,HAND1,GALNT10,MFAP3,CAMKMT,PREPL,PPM1B,LRPPRC,RAP1A,WDR77,CEPT1,DRAM2,RPL19,PLXDC1,NPEPPS,KPNB1,OSBPL7,MRPL10,NFE2L1,CDK5RAP3,SKAP1,SNX11,MBNL1,RAP2B,LIN28B,PREP,KATNAL1,HMGB1,ALOX5AP,MEDAG,HSPH1,ACP1,CCDC181,BLZF1,TSPO2,TREML1,CDC42EP4,COG1,SSTR2,SLC39A11,USP25,GPBP1,FPGS,AK1,ST6GALNAC6,ST6GALNAC2,PIP5KL1,DPM2,SLC25A25,PTGES2,DNM1,URM1,ODF2,GLE1,SPTAN1,WDR34,ZDHHC12,T…
GO:CC	organelle	GO:0043226	4.84413e-23	22.3148	12726	340	216	35670	CLIP4,TRMT61B,PPP1CB,SPDYA,HNRNPU,EFCAB2,HAND1,SAP30L,GALNT10,MFAP3,CAMKMT,PREPL,PPM1B,SNORA25,LRPPRC,RAP1A,WDR77,OVGP1,CEPT1,DRAM2,LRIF1,CDK12,MED1,RPL19,KPNB1,TBX21,OSBPL7,MRPL10,NFE2L1,CDK5RAP3,SP2,SKAP1,SNX11,MBNL1,P2RY1,RAP2B,LIN28B,PREP,KATNAL1,HMGB1,USPL1,ALOX5AP,HSPH1,CCDC181,BLZF1,NME7,ATP1B1,TSPO2,TREML1,FOXP4,CDC42EP4,COG1,SLC39A11,USP25,MIER3,GPBP1,FPGS,ENG,AK1,ST6GALNAC6,ST6GALNAC2,D…
GO:CC	intracellular membrane-bounded organelle	GO:0043231	7.38552e-22	21.1316	11131	340	197	35670	CLIP4,TRMT61B,PPP1CB,SPDYA,HNRNPU,HAND1,SAP30L,GALNT10,MFAP3,CAMKMT,PREPL,PPM1B,SNORA25,LRPPRC,WDR77,OVGP1,CEPT1,DRAM2,LRIF1,CDK12,MED1,KPNB1,TBX21,OSBPL7,MRPL10,NFE2L1,CDK5RAP3,SP2,SKAP1,SNX11,MBNL1,RAP2B,LIN28B,PREP,HMGB1,USPL1,ALOX5AP,HSPH1,BLZF1,TSPO2,TREML1,FOXP4,CDC42EP4,COG1,SLC39A11,USP25,MIER3,GPBP1,FPGS,ENG,ST6GALNAC6,ST6GALNAC2,DPM2,SLC25A25,PTGES2,CIZ1,SWI5,URM1,ODF2,GLE1,SPTAN1,SET,P…
GO:CC	intracellular organelle	GO:0043229	1.79037e-21	20.7471	12448	340	210	35670	CLIP4,TRMT61B,PPP1CB,SPDYA,HNRNPU,HAND1,SAP30L,GALNT10,MFAP3,CAMKMT,PREPL,PPM1B,SNORA25,LRPPRC,WDR77,OVGP1,CEPT1,DRAM2,LRIF1,CDK12,MED1,RPL19,KPNB1,TBX21,OSBPL7,MRPL10,NFE2L1,CDK5RAP3,SP2,SKAP1,SNX11,MBNL1,RAP2B,LIN28B,PREP,KATNAL1,HMGB1,USPL1,ALOX5AP,HSPH1,CCDC181,BLZF1,NME7,TSPO2,TREML1,FOXP4,CDC42EP4,COG1,SLC39A11,USP25,MIER3,GPBP1,FPGS,ENG,AK1,ST6GALNAC6,ST6GALNAC2,DPM2,SLC25A25,PTGES2,CIZ1,D…
GO:CC	cytosol	GO:0005829	4.65654e-13	12.3319	3025	374	82	35670	PPP1CB,HNRNPU,PREPL,PPM1B,WDR77,RPL19,NPEPPS,KPNB1,OSBPL7,NFE2L1,CDK5RAP3,SKAP1,MBNL1,RAP2B,LIN28B,PREP,HSPH1,ACP1,TREML1,SSTR2,USP25,GPBP1,FPGS,AK1,PIP5KL1,PTGES2,URM1,GLE1,WDR34,TBC1D13,USP12,RRP12,EXOSC1,MMS19,ZFYVE27,SIRT1,HERC4,STOX1,DDX21,EIF3E,PSMB9,RING1,HMGCLL1,PSMA4,IREB2,IL7R,SKP2,PTGES3,STAT6,MTFR1,ARMC1,IPO8,ATP6V1E1,BID,MICAL3,CLOCK,KAT2B,PARG,ALOX5,MOCS2,PANK3,MBD2,GPRC5B,RIC8B,USP…
GO:CC	membrane-enclosed lumen	GO:0031974	5.02061e-13	12.2992	4364	323	93	35670	PPP1CB,SPDYA,HNRNPU,HAND1,SAP30L,CAMKMT,PPM1B,SNORA25,LRPPRC,WDR77,LRIF1,CDK12,MED1,KPNB1,OSBPL7,MRPL10,NFE2L1,CDK5RAP3,SP2,SKAP1,MBNL1,LIN28B,USPL1,HSPH1,BLZF1,TREML1,MIER3,ENG,CIZ1,SWI5,GLE1,ATP8A2,RNF6,CDK8,RRP12,EXOSC1,MMS19,ZFYVE27,SIRT1,HERC4,HNRNPH3,CCAR1,STOX1,DDX50,DDX21,EIF3E,TAP2,BRD2,RING1,HSD17B8,SLC39A7,RXRB,GFRAL,MCM3,CHRNA3,PSMA4,IL7R,SKP2,PRIM1,STAT6,ZBTB39,SLC16A7,MEF2C,SNORA79,…
GO:CC	organelle lumen	GO:0043233	5.02061e-13	12.2992	4364	323	93	35670	PPP1CB,SPDYA,HNRNPU,HAND1,SAP30L,CAMKMT,PPM1B,SNORA25,LRPPRC,WDR77,LRIF1,CDK12,MED1,KPNB1,OSBPL7,MRPL10,NFE2L1,CDK5RAP3,SP2,SKAP1,MBNL1,LIN28B,USPL1,HSPH1,BLZF1,TREML1,MIER3,ENG,CIZ1,SWI5,GLE1,ATP8A2,RNF6,CDK8,RRP12,EXOSC1,MMS19,ZFYVE27,SIRT1,HERC4,HNRNPH3,CCAR1,STOX1,DDX50,DDX21,EIF3E,TAP2,BRD2,RING1,HSD17B8,SLC39A7,RXRB,GFRAL,MCM3,CHRNA3,PSMA4,IL7R,SKP2,PRIM1,STAT6,ZBTB39,SLC16A7,MEF2C,SNORA79,…
GO:CC	intracellular organelle lumen	GO:0070013	5.02061e-13	12.2992	4364	323	93	35670	PPP1CB,SPDYA,HNRNPU,HAND1,SAP30L,CAMKMT,PPM1B,SNORA25,LRPPRC,WDR77,LRIF1,CDK12,MED1,KPNB1,OSBPL7,MRPL10,NFE2L1,CDK5RAP3,SP2,SKAP1,MBNL1,LIN28B,USPL1,HSPH1,BLZF1,TREML1,MIER3,ENG,CIZ1,SWI5,GLE1,ATP8A2,RNF6,CDK8,RRP12,EXOSC1,MMS19,ZFYVE27,SIRT1,HERC4,HNRNPH3,CCAR1,STOX1,DDX50,DDX21,EIF3E,TAP2,BRD2,RING1,HSD17B8,SLC39A7,RXRB,GFRAL,MCM3,CHRNA3,PSMA4,IL7R,SKP2,PRIM1,STAT6,ZBTB39,SLC16A7,MEF2C,SNORA79,…
GO:CC	nucleoplasm	GO:0005654	8.12625e-12	11.0901	3079	323	73	35670	PPP1CB,SPDYA,HNRNPU,HAND1,SAP30L,CAMKMT,WDR77,LRIF1,CDK12,MED1,KPNB1,OSBPL7,MRPL10,NFE2L1,SP2,SKAP1,MBNL1,LIN28B,USPL1,HSPH1,BLZF1,TREML1,MIER3,ENG,CIZ1,ATP8A2,RNF6,MMS19,ZFYVE27,SIRT1,HNRNPH3,STOX1,DDX21,EIF3E,TAP2,BRD2,RING1,SLC39A7,RXRB,GFRAL,MCM3,CHRNA3,PSMA4,IL7R,SKP2,STAT6,ZBTB39,SLC16A7,MEF2C,MICAL3,CLOCK,POLR2B,KAT2B,PARG,ALOX5,ZNF22,MOCS2,FBLL1,MBD2,LYRM1,GPRC5B,CBR3,MORC3,CHAF1B,SIM2,BC…
GO:CC	nuclear lumen	GO:0031981	9.37239e-12	11.0281	4043	345	90	35670	PPP1CB,SPDYA,HNRNPU,HAND1,SAP30L,CAMKMT,PPM1B,SNORA25,LRPPRC,WDR77,LRIF1,CDK12,MED1,KPNB1,OSBPL7,MRPL10,NFE2L1,CDK5RAP3,SP2,SKAP1,MBNL1,LIN28B,USPL1,HSPH1,BLZF1,TREML1,MIER3,ENG,CIZ1,SWI5,GLE1,ATP8A2,RNF6,CDK8,RRP12,EXOSC1,MMS19,ZFYVE27,SIRT1,HERC4,HNRNPH3,STOX1,DDX50,DDX21,EIF3E,TAP2,BRD2,RING1,SLC39A7,RXRB,GFRAL,MCM3,CHRNA3,PSMA4,IL7R,SKP2,PRIM1,STAT6,ZBTB39,SLC16A7,MEF2C,SNORA79,MICAL3,CLOCK,P…
GO:CC	nucleus	GO:0005634	3.83723e-11	10.416	7674	376	144	35670	CLIP4,PPP1CB,SPDYA,HNRNPU,HAND1,SAP30L,MFAP3,CAMKMT,PPM1B,SNORA25,LRPPRC,WDR77,LRIF1,CDK12,MED1,KPNB1,TBX21,OSBPL7,MRPL10,NFE2L1,CDK5RAP3,SP2,SKAP1,MBNL1,LIN28B,PREP,HMGB1,USPL1,ALOX5AP,HSPH1,BLZF1,TREML1,FOXP4,SLC39A11,MIER3,GPBP1,ENG,PTGES2,CIZ1,SWI5,URM1,GLE1,SET,PKN3,ENDOG,ATP8A2,RNF6,CDK8,USP12,RRP12,EXOSC1,MMS19,ANKRD2,ZFYVE27,PRDM6,CSNK1G3,SIRT1,HERC4,ATOH7,HNRNPH3,CCAR1,STOX1,DDX50,DDX21,…
GO:CC	membrane	GO:0016020	1.22986e-10	9.91015	9011	351	151	35670	PPP1CB,GALNT10,MFAP3,PPM1B,RAP1A,ADORA3,CEPT1,DRAM2,CD53,KCNA3,STAC2,PLXDC1,NPEPPS,KPNB1,OSBPL7,NFE2L1,SKAP1,SNX11,P2RY1,RAP2B,LIN28B,POPDC3,HMGB1,ALOX5AP,ACP1,BLZF1,ATP1B1,TSPO2,TREML1,TREM2,TREM-1,CDC42EP4,C17ORF80,COG1,SSTR2,SLC39A11,GPBP1,ENG,ST6GALNAC6,ST6GALNAC2,PIP5KL1,DPM2,SLC25A25,PTGES2,LCN2,CIZ1,DNM1,GLE1,SPTAN1,ZDHHC12,TBC1D13,ENDOG,ATP8A2,RNF6,DKK1,PRKG1,RRP12,EXOSC1,MARVELD1,ZFYVE27…
GO:CC	protein-containing complex	GO:0032991	1.5365e-07	6.81347	6218	373	114	35670	TRMT61B,PPP1CB,HNRNPU,HAND1,SAP30L,CAMKMT,LRPPRC,RAP1A,WDR77,KCNA3,CDK12,MED1,FBXL20,RPL19,PLXDC1,KPNB1,MRPL10,CDK5RAP3,SKAP1,KATNAL1,HSPH1,ATP1B1,COG1,SSC-LET-7C,MIER3,ENG,DPM2,DNM1,SWI5,ODF2,GLE1,WDR34,ATP8A2,CDK8,WASF3,EXOSC1,MMS19,LOXL4,SIRT1,HNRNPH3,DDX21,EMC2,EIF3E,SLA-DOB,TAP2,PSMB8,TAP1,PSMB9,SLA-DMB,SLA-DMA,RING1,SSC-MIR-219A,HSD17B8,RXRB,COL11A2,GFRAL,SSC-MIR-206,SSC-MIR-133B,MCM3,CHRNA…
GO:CC	plasma membrane	GO:0005886	2.74852e-05	4.5609	4647	377	87	35670	PPP1CB,MFAP3,RAP1A,ADORA3,DRAM2,CD53,KCNA3,STAC2,PLXDC1,OSBPL7,SKAP1,P2RY1,RAP2B,POPDC3,HMGB1,ACP1,ATP1B1,TSPO2,TREML1,TREM2,TREM-1,CDC42EP4,SSTR2,SLC39A11,GPBP1,ENG,PIP5KL1,CIZ1,DNM1,SPTAN1,ATP8A2,DKK1,PRKG1,RRP12,ZFYVE27,CSNK1G3,DDX50,SLA-DOB,SLA-DMB,SLA-DMA,HSD17B8,GFRAL,IL17A,CHRNA5,CHRNA3,OVCH2,SYT9,OR10A4,IL7R,STAC3,NMUR2,GLRA1,SLC16A7,CD82,MTFR1,IL17RA,ATP6V1E1,MICAL3,ITGA1,ITGA2,TENM2,DCU…
GO:CC	microtubule cytoskeleton	GO:0015630	3.77023e-05	4.42363	1081	189	22	35670	CLIP4,HNRNPU,LRPPRC,OVGP1,LRIF1,CDK5RAP3,KATNAL1,HSPH1,CCDC181,NME7,CDC42EP4,DNM1,ODF2,GLE1,SPTAN1,WDR34,MMS19,CEP120,STOX1,TAP1,MCM3,SPEF2
GO:CC	endomembrane system	GO:0012505	3.791e-05	4.42125	3009	339	59	35670	GALNT10,PREPL,WDR77,CEPT1,DRAM2,KPNB1,OSBPL7,NFE2L1,SNX11,RAP2B,ALOX5AP,BLZF1,TSPO2,TREML1,CDC42EP4,COG1,SLC39A11,USP25,ST6GALNAC6,ST6GALNAC2,DPM2,PTGES2,GLE1,ZDHHC12,ATP8A2,RNF6,PRKG1,ZFYVE27,SIRT1,CCAR1,EMC2,TAP2,TAP1,SLA-DMB,SLA-DMA,SLC39A7,HMGCLL1,SYT9,RANBP3L,IPO8,ATP6V1E1,TMEM165,ALOX5,UMOD,PDILT,GP2,CDKAL1,CWH43,PIGP,FKBP2,RTN3,FADS2,FADS3,RAB3IL1,TMEM258,FADS1,DAGLA,SYT7,CYB561A3
GO:CC	intracellular non-membrane-bounded organelle	GO:0043232	6.03035e-05	4.21966	4564	153	44	35670	CLIP4,PPP1CB,HNRNPU,HAND1,SAP30L,PREPL,PPM1B,SNORA25,LRPPRC,OVGP1,LRIF1,MED1,RPL19,KPNB1,MRPL10,CDK5RAP3,MBNL1,LIN28B,KATNAL1,HMGB1,HSPH1,CCDC181,NME7,CDC42EP4,AK1,DNM1,SWI5,ODF2,GLE1,SPTAN1,WDR34,SET,CDK8,WASF3,RRP12,EXOSC1,MMS19,CEP120,SIRT1,HERC4,MYPN,STOX1,DDX50,DDX21
GO:CC	non-membrane-bounded organelle	GO:0043228	6.0685e-05	4.21692	4565	153	44	35670	CLIP4,PPP1CB,HNRNPU,HAND1,SAP30L,PREPL,PPM1B,SNORA25,LRPPRC,OVGP1,LRIF1,MED1,RPL19,KPNB1,MRPL10,CDK5RAP3,MBNL1,LIN28B,KATNAL1,HMGB1,HSPH1,CCDC181,NME7,CDC42EP4,AK1,DNM1,SWI5,ODF2,GLE1,SPTAN1,WDR34,SET,CDK8,WASF3,RRP12,EXOSC1,MMS19,CEP120,SIRT1,HERC4,MYPN,STOX1,DDX50,DDX21
GO:CC	cell periphery	GO:0071944	6.54765e-05	4.18391	5039	377	91	35670	PPP1CB,MFAP3,RAP1A,ADORA3,DRAM2,CD53,KCNA3,STAC2,PLXDC1,OSBPL7,SKAP1,P2RY1,RAP2B,POPDC3,HMGB1,ACP1,ATP1B1,TSPO2,TREML1,TREM2,TREM-1,CDC42EP4,SSTR2,SLC39A11,GPBP1,ENG,PIP5KL1,CIZ1,DNM1,SPTAN1,ATP8A2,DKK1,PRKG1,RRP12,ZFYVE27,LOXL4,CSNK1G3,STOX1,DDX50,SLA-DOB,SLA-DMB,SLA-DMA,HSD17B8,COL11A2,GFRAL,IL17A,CHRNA5,CHRNA3,OVCH2,SYT9,OR10A4,IL7R,STAC3,NMUR2,GLRA1,SLC16A7,MMP13,CD82,MTFR1,IL17RA,ATP6V1E1,MI…
GO:CC	catalytic complex	GO:1902494	0.000256794	3.59042	1584	298	34	35670	TRMT61B,PPP1CB,HNRNPU,SAP30L,WDR77,CDK12,FBXL20,DPM2,WDR34,EXOSC1,SIRT1,DDX21,PSMB8,PSMB9,RING1,HSD17B8,PSMA4,SKP2,PTGES3,PRIM1,NDUFA4L2,DCUN1D5,CECR2,ATP6V1E1,POLR2B,KAT2B,MOCS2,MBD2,DCUN1D3,GCSH,FBXO9,DCUN1D4,PIGP,BCKDHB
GO:CC	organelle membrane	GO:0031090	0.000303206	3.51826	2154	339	45	35670	GALNT10,CEPT1,KPNB1,NFE2L1,RAP2B,LIN28B,ALOX5AP,BLZF1,ATP1B1,TSPO2,DPM2,SLC25A25,PTGES2,GLE1,ENDOG,RNF6,EXOSC1,ZFYVE27,SIRT1,SLC25A16,CCAR1,EMC2,TAP2,TAP1,SLA-DMB,SLA-DMA,MCM3,NDUFA4L2,ARMC1,BID,TMEM165,ALOX5,UMOD,CDKAL1,PIGP,GPR137,BAD,RTN3,FADS2,FADS3,TMEM258,FADS1,DAGLA,TMEM138,CYB561A3
GO:CC	sperm flagellum	GO:0036126	0.00061618	3.21029	115	106	6	35670	EFCAB2,RAP1A,CCDC181,ATP1B1,AK1,ODF2
GO:CC	9+2 motile cilium	GO:0097729	0.00115125	2.93883	128	106	6	35670	EFCAB2,RAP1A,CCDC181,ATP1B1,AK1,ODF2
GO:CC	intracellular protein-containing complex	GO:0140535	0.00176495	2.75327	810	363	24	35670	HNRNPU,RAP1A,FBXL20,DPM2,ODF2,MMS19,PSMB8,PSMB9,RING1,PSMA4,SKP2,PTGES3,PRIM1,DCUN1D5,POLR2B,KAT2B,MOCS2,DCUN1D3,FBXO9,DCUN1D4,STIP1,DDB1,CLP1,EIF4E
GO:CC	cytoskeleton	GO:0005856	0.00192677	2.71517	1821	177	25	35670	CLIP4,HNRNPU,PREPL,LRPPRC,OVGP1,LRIF1,CDK5RAP3,KATNAL1,HSPH1,CCDC181,NME7,CDC42EP4,AK1,DNM1,ODF2,GLE1,SPTAN1,WDR34,WASF3,MMS19,CEP120,STOX1,TAP1,GFRAL,MCM3
GO:CC	Golgi apparatus	GO:0005794	0.00285924	2.54375	1097	123	15	35670	GALNT10,PREPL,WDR77,CEPT1,DRAM2,BLZF1,TREML1,COG1,SLC39A11,ST6GALNAC6,ST6GALNAC2,PTGES2,ZDHHC12,ATP8A2,PRKG1
GO:CC	extracellular region	GO:0005576	0.00838397	2.07655	1620	270	29	35670	CHIA,CHI3L2,RAP2B,HMGB1,DPT,XCL1,ENG,LCN2,DKK1,SLIT1,SFRP5,LOXL4,FLRT2,RSPO2,COL11A2,BMP5,IL17A,OLFML1,NRG3,TAC3,MMP13,PDGFD,NMU,IGFBP7,MSMB,SLIT3,UMOD,GP2,GPRC5B
GO:CC	cell projection	GO:0042995	0.00925707	2.03353	1558	145	19	35670	HNRNPU,EFCAB2,RAP1A,KCNA3,P2RY1,CCDC181,ATP1B1,SSTR2,AK1,PIP5KL1,ODF2,GLE1,SPTAN1,WDR34,WASF3,KLHL1,MORN4,ZFYVE27,ATOH7
GO:CC	motile cilium	GO:0031514	0.00979255	2.0091	186	106	6	35670	EFCAB2,RAP1A,CCDC181,ATP1B1,AK1,ODF2
GO:CC	microtubule	GO:0005874	0.0101	1.99568	303	66	6	35670	CLIP4,HNRNPU,LRPPRC,CDK5RAP3,KATNAL1,HSPH1
GO:CC	sarcolemma	GO:0042383	0.0106913	1.97097	82	71	4	35670	STAC2,POPDC3,ACP1,ATP1B1
GO:CC	centrosome	GO:0005813	0.0116815	1.9325	557	177	12	35670	HNRNPU,LRIF1,CDK5RAP3,KATNAL1,NME7,ODF2,GLE1,WDR34,CEP120,STOX1,TAP1,MCM3
GO:CC	MHC class II protein complex	GO:0042613	0.0123571	1.90808	13	163	3	35670	SLA-DOB,SLA-DMB,SLA-DMA
GO:CC	MHC protein complex	GO:0042611	0.0195273	1.70936	15	163	3	35670	SLA-DOB,SLA-DMB,SLA-DMA
GO:CC	cilium	GO:0005929	0.0243336	1.61379	546	110	9	35670	EFCAB2,RAP1A,P2RY1,CCDC181,ATP1B1,AK1,ODF2,GLE1,WDR34
GO:CC	TAP complex	GO:0042825	0.0285285	1.54472	3	160	2	35670	TAP2,TAP1
GO:CC	endoplasmic reticulum	GO:0005783	0.0389908	1.40904	1218	331	26	35670	CEPT1,KPNB1,OSBPL7,NFE2L1,ALOX5AP,TSPO2,USP25,DPM2,ZDHHC12,ZFYVE27,EMC2,TAP2,TAP1,SLC39A7,HMGCLL1,UMOD,PDILT,CDKAL1,CWH43,PIGP,FKBP2,RTN3,FADS2,FADS3,TMEM258,FADS1
GO:CC	extracellular space	GO:0005615	0.0412527	1.38455	1163	270	22	35670	CHIA,CHI3L2,RAP2B,XCL1,ENG,LCN2,DKK1,SLIT1,SFRP5,LOXL4,FLRT2,COL11A2,BMP5,IL17A,OLFML1,NRG3,PDGFD,IGFBP7,SLIT3,UMOD,GP2,GPRC5B
KEGG	KEGG root term	KEGG:00000	1.30395e-12	11.8847	6289	369	127	35670	PPP1CB,HAND1,SAP30L,GALNT10,CAMKMT,RAP1A,ADORA3,CEPT1,CHIA,MED1,KPNB1,TBX21,MRPL10,PNPO,SKAP1,P2RY1,POPDC3,PREP,HMGB1,ALOX5AP,HSPH1,ACP1,NME7,TSPO2,TREM2,SSTR2,SLC39A11,USP25,SSC-LET-7C,MAP3K1,FPGS,AK1,ST6GALNAC2,DPM2,PTGES2,LCN2,DNM1,GLE1,ENDOG,WASF3,PRKG1,SLIT1,ZFYVE27,PRDM6,CSNK1G3,SIRT1,HERC4,EIF3E,SLA-DOB,PSMB8,PSMB9,SLA-DMB,SLA-DMA,HSD17B8,SLC39A7,RXRB,COL11A2,BMP5,HMGCLL1,SSC-MIR-206,SSC-M…
KEGG	Metabolic pathways	KEGG:01100	1.22088e-09	8.91333	1116	298	36	35670	GALNT10,CAMKMT,CEPT1,CHIA,PNPO,ACP1,NME7,FPGS,AK1,ST6GALNAC2,DPM2,PTGES2,PRDM6,SIRT1,HSD17B8,HMGCLL1,HYKK,NADK2,PTGES3,HSD17B6,RDH16,NDUFA4L2,PDE7A,ATP6V1E1,ALOX5,MOCS2,PANK3,ACSM3,ACSM4,ACSM5,GCSH,GSTA4,CBR3,HLCS,PIGP,BCKDHB
KEGG	Inflammatory bowel disease	KEGG:05321	3.98276e-05	4.39982	44	201	6	35670	TBX21,SLA-DOB,SLA-DMB,SLA-DMA,IL17A,STAT6
KEGG	Th17 cell differentiation	KEGG:04659	9.01266e-05	4.04515	81	201	7	35670	TBX21,SLA-DOB,SLA-DMB,SLA-DMA,RXRB,IL17A,STAT6
KEGG	Biosynthesis of cofactors	KEGG:01240	0.000238604	3.62232	107	254	8	35670	PNPO,NME7,FPGS,AK1,NADK2,HSD17B6,MOCS2,PANK3
KEGG	Butanoate metabolism	KEGG:00650	0.00149096	2.82653	17	265	4	35670	HMGCLL1,ACSM3,ACSM4,ACSM5
KEGG	Th1 and Th2 cell differentiation	KEGG:04658	0.0110311	1.95738	70	201	5	35670	TBX21,SLA-DOB,SLA-DMB,SLA-DMA,STAT6
KEGG	Asthma	KEGG:05310	0.011399	1.94313	16	163	3	35670	SLA-DOB,SLA-DMB,SLA-DMA
KEGG	Rheumatoid arthritis	KEGG:05323	0.0143046	1.84452	65	229	5	35670	SLA-DOB,SLA-DMB,SLA-DMA,IL17A,ATP6V1E1
KEGG	IL-17 signaling pathway	KEGG:04657	0.0158814	1.79911	67	227	5	35670	USP25,LCN2,IL17A,MMP13,IL17RA
KEGG	Graft-versus-host disease	KEGG:05332	0.0307216	1.51256	22	163	3	35670	SLA-DOB,SLA-DMB,SLA-DMA
KEGG	Viral myocarditis	KEGG:05416	0.032639	1.48626	41	231	4	35670	SLA-DOB,SLA-DMB,SLA-DMA,BID
KEGG	Allograft rejection	KEGG:05330	0.0352115	1.45332	23	163	3	35670	SLA-DOB,SLA-DMB,SLA-DMA
